# Supplementary material for: The Co(ii)/spiroBox-catalyzed enantioselective Mukaiyama-Mannich reaction for the synthesis of quaternary α-amino acid derivatives
Source: Royal Society of Chemistry journal article supplement (doi:10.1039/d2nj00623e), 2022-01-01
Supplement: d2nj00623e1.pdf [file d2nj00623e1.pdf]

# **Co(II)/SpiroBox-catalyzed Enantioselective Mukaiyama-Mannich Reaction for the Synthesis of Quaternary $\alpha$ -Amino Acid Derivatives**

Yanshun Li, Nanxing Gao, Guorui Cao, Dawei Teng\*

College of Chemical Engineering, Qingdao University of Science and Technology

E-mail: dteng@qust.edu.cn

## **Table of Contents**

|                                                                                    |     |
|------------------------------------------------------------------------------------|-----|
| 1. Experimental Section .....                                                      | S2  |
| 1.1. General.....                                                                  | S2  |
| 1.2. General procedure for synthesis of ligands <b>L1a-L1c</b> and <b>L2</b> ..... | S3  |
| 1.3. General procedure for synthesis of ligand <b>L3</b> .....                     | S5  |
| 1.4. General procedure for synthesis of ligand <b>L4</b> .....                     | S6  |
| 2. General procedure for asymmetric Mukaiyama-Mannich reaction .....               | S8  |
| 3. NMR spectrum and HPLC trace of compounds.....                                   | S26 |
| 5. References .....                                                                | S84 |

## 1. Experimental Section

### 1.1. General

All the reagents were purchased from Aldrich, TCI, Energy chemical and other local suppliers, and used without purification. Toluene, methanol, dichloromethane, chloroform, acetonitrile and tetrahydrofuran were used without purification unless otherwise stated. All reactions were monitored by TLC. Chromatography refers to open column chromatography on silica gel (200-300mesh). <sup>1</sup>H NMR spectra were recorded on 500 or 400 MHz, <sup>13</sup>C NMR spectra were recorded on 126 or 101 MHz by using a Bruker Avance spectrometer. Chemical shifts were reported in parts per million (δ) relative to tetramethylsilane (TMS). Mass spectra were performed on an Ultima Global spectrometer with an ESI source. Optical rotations were measured on Rudolph Autopol IV-Tautomatic polarimeter and reported as follows:  $[\alpha]_D^{20}$  (c g/100 mL, solvent). Chiral HPLC analysis was performed using a Shimadzu LC-20AT UFLC. Substrates silyl enol ethers were synthesized according to the already reported literatures<sup>[1]</sup>. Substrates cyclic *N*-sulfonyl ketimino ester were synthesized according to the known procedures<sup>[2]</sup>. The (*R*)-indane-based chiral amino alcohol was synthesized according to reported literature<sup>[3]</sup> and our pioneering studies<sup>[4]</sup>.

## 1.2. General procedure for synthesis of ligands **L1a-L1c** and **L2**

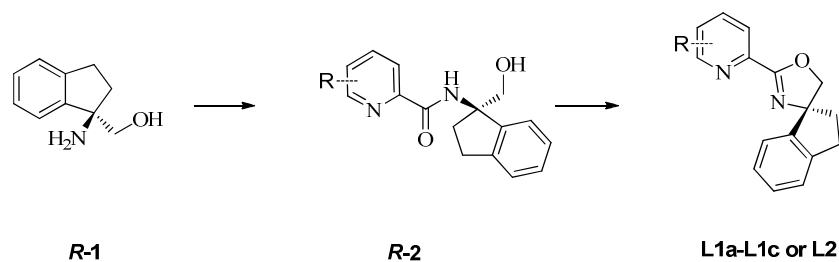

To a solution of substituted 2-pyridine carboxylic acid or 2-Quinoline carboxylic acid (2.62 mmol) in anhydrous DCM (10 mL) was added *N*-hydroxybenzotriazole (HOBT) (2.88 mmol), *N*-(3-dimethylaminopropyl)-*N'*-ethylcarbodiimide hydrochloride (EDCI·HCl) (2.88 mol), and triethylamine (4.32 mmol) at 0 °C sequentially. The reaction mixture was stirred at room temperature for 1 hour. Then chiral amino alcohol **R-1** (2.62 mmol) was added and the reaction mixture was allowed warm to room temperature and stirred for 3 hours. The solvent was evaporated to obtain the intermediate **R-2**. The intermediate **R-2** was used directly without further purification. To a solution of triphenylphosphine (3.14 mmol), and 2,3-dichloro-5,6-dicyano-1,4-benzoquinon (DDQ, 3.14 mmol) in DCM (10 mL) was added the intermediate **R-2** slowly at 0 °C. The reaction mixture was warmed to room temperature and monitored by TLC. The reaction mixture was filtrated through celite, washed with 5% sodium hydroxide. The aqueous phase was extracted with DCM. The combined organic layers were dried over anhydrous sodium sulfate, filtrated, and concentrated under reduced pressure. The residue was purified by chromatography with petroleum ether/ethyl acetate 3:1 (v/v) to give **L1a-L1c** or **L2**.

**(R)-2'-(Pyridin-2-yl)-2,3-dihydro-5'H-spiro[indene-1,4'-oxazole] (L1a)** Yellow oil,  $[\alpha]_{\text{D}}^{20} = +70.2$  (c = 0.4, MeOH), 49% yield.  $^1\text{H}$  NMR (500 MHz,  $\text{CDCl}_3$ )  $\delta$  8.74 (d,  $J = 4.9$  Hz, 1H), 8.13 (d,  $J = 7.9$  Hz, 1H), 7.78 (t,  $J = 7.8$  Hz, 1H), 7.43-7.40 (m, 1H), 7.27 (d,  $J = 11.5$  Hz, 4H), 4.69 (d,  $J = 8.8$  Hz, 1H), 4.59 (d,  $J = 8.8$  Hz, 1H), 3.23-3.18 (m, 1H), 3.00-2.98 (m, 1H), 2.59-2.55 (m, 1H), 2.30-2.26 (m, 1H).  $^{13}\text{C}$  NMR (126 MHz,  $\text{CDCl}_3$ )  $\delta$  162.36, 149.96, 147.02, 145.93, 143.61, 136.83, 128.49, 127.39, 125.83, 124.92, 124.39, 123.60, 81.21, 79.12, 40.38, 30.44. HRMS (ESI): calcd for  $\text{C}_{16}\text{H}_{14}\text{N}_2\text{O}$   $[\text{M}+\text{Na}]^+$  : 273.1004, found 273.1008.

**(R)-2'-(5-(Trifluoromethyl)pyridin-2-yl)-2,3-dihydro-5'H-spiro[indene-1,4'-oxazole] (L1b)** White solid, m.p.: 104.5-105.3 °C,  $[\alpha]_{\text{D}}^{20} = +87.5$  (c = 0.2, MeOH), 55% yield.  $^1\text{H}$  NMR (500 MHz,  $\text{CDCl}_3$ )  $\delta$  8.90 (s, 1H), 8.17 (d,  $J = 8.2$  Hz, 1H), 7.95 (dd,  $J = 8.3, 2.3$  Hz, 1H), 7.23-7.12 (m, 4H), 4.64 (d,  $J = 8.8$  Hz, 1H), 4.53 (d,  $J = 8.9$  Hz, 1H), 3.17-3.11 (m, 1H), 2.92-2.89 (m, 1H), 2.53-2.47 (m, 1H), 2.23-2.18 (m, 1H).  $^{13}\text{C}$  NMR (126 MHz,  $\text{CDCl}_3$ )  $\delta$  161.09, 149.96, 146.62 (q,  $J = 4.1$  Hz), 145.32, 143.46, 133.96 (q,  $J = 3.6$  Hz), 128.49, 128.10 (q,  $J = 33.2$  Hz), 127.27, 124.83, 123.94, 123.31, 123.14 (q,  $J = 273.4$  Hz), 81.24, 79.09, 40.14, 30.25. HRMS (ESI): calcd for  $\text{C}_{17}\text{H}_{13}\text{F}_3\text{N}_2\text{O}$   $[\text{M}+\text{Na}]^+$  : 341.0878, found 341.0883.

**(R)-2'-(5-Methoxypyridin-2-yl)-2,3-dihydro-5'H-spiro[indene-1,4'-oxazole] (L1c)** White solid, m.p.: 107.7-108.5 °C,  $[\alpha]_{\text{D}}^{20} = +46.4$  (c = 0.2, MeOH), 56% yield.  $^1\text{H}$  NMR (500 MHz,  $\text{CDCl}_3$ )  $\delta$  8.40 (d,  $J = 2.9$  Hz, 1H), 8.08 (d,  $J = 8.7$  Hz, 1H), 7.28-7.20 (m, 5H), 4.65 (d,  $J = 8.7$  Hz, 1H), 4.56 (d,  $J = 8.4$  Hz, 1H), 3.92 (s, 3H),

3.24-3.18 (m, 1H), 3.01-2.95 (m, 1H), 2.59-2.54 (m, 1H), 2.30-2.25 (m, 1H).  $^{13}\text{C}$  NMR (126 MHz,  $\text{CDCl}_3$ )  $\delta$  161.96, 157.23, 145.95, 143.37, 139.11, 137.81, 128.20, 127.16, 125.15, 124.69, 123.41, 120.08, 80.91, 78.87, 55.75, 40.20, 30.24. HRMS (ESI): calcd for  $\text{C}_{17}\text{H}_{16}\text{N}_2\text{O}_2$   $[\text{M}+\text{H}]^+$ : 281.1290, found 281.1288,  $[\text{M}+\text{Na}]^+$ : 303.1109, found 303.1106.

**(R)-2'-(Quinolin-2-yl)-2,3-dihydro-5'H-spiro[indene-1,4'-oxazole] (L2)** White solid, m.p.: 132.5-133.2 °C,  $[\alpha]_{\text{D}}^{20} = +89.7$  (c = 0.3, MeOH), 67% yield.  $^1\text{H}$  NMR (500 MHz,  $\text{CDCl}_3$ )  $\delta$  8.31 (d,  $J = 8.5$  Hz, 1H), 8.27-8.22 (m, 2H), 7.87 (d,  $J = 8.2$  Hz, 1H), 7.78 (t,  $J = 7.8$  Hz, 1H), 7.62 (t,  $J = 7.5$  Hz, 1H), 7.29-7.26 (m, 4H), 4.76 (d,  $J = 8.8$  Hz, 1H), 4.67 (d,  $J = 8.8$  Hz, 1H), 3.25-3.19 (m, 1H), 3.04-3.00 (m, 1H), 2.64-2.59 (m, 1H), 2.34-2.29 (m, 1H).  $^{13}\text{C}$  NMR (126 MHz,  $\text{CDCl}_3$ )  $\delta$  162.51, 147.63, 146.95, 145.74, 143.44, 136.72, 130.38, 130.08, 128.83, 128.38, 127.99, 127.57, 127.30, 124.80, 123.49, 121.14, 81.17, 79.27, 40.30, 30.30. HRMS (ESI): calcd for  $\text{C}_{16}\text{H}_{14}\text{N}_2\text{O}$   $[\text{M}+\text{Na}]^+$ : 323.1160, found 323.1162.

### 1.3. General procedure for synthesis of ligand L3

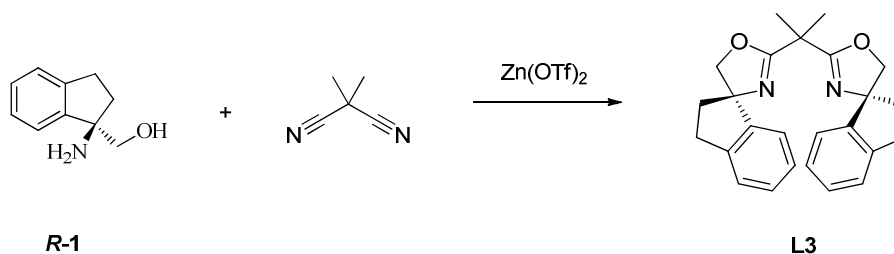

A 100-ml three-necked round-bottomed flask fitted with a reflux condenser was charged with 2, 2-dimethyl malononitrile (1.31 mmol),  $\text{Zn}(\text{OTf})_2$  (1.31 mmol) and

chiral amino alcohol *R*-1 (2.62 mmol). The system was purged with argon and toluene (50 mL) was added. The solution was heated under reflux for 48 h. The reaction mixture was concentrated under reduced pressure. The residue was purified by chromatography with petroleum ether/ethyl acetate 3:1 (v/v) to give **L3**.

**Bis((*R*)-2,3-dihydro-5'*H*-spiro[indene-1,4'-oxazol]-2'-yl)propane (**L3**)** White solid, m.p.: 66.1-67.5 °C,  $[\alpha]_D^{20} = +18.4$  (c= 0.3, MeOH), 69% yield. <sup>1</sup>H NMR (500 MHz, CDCl<sub>3</sub>) δ 7.25-7.16 (m, 8H), 4.40 (d, *J* = 8.5 Hz, 2H), 4.34 (d, *J* = 8.5 Hz, 2H), 3.13-3.07 (m, 2H), 2.97-2.90 (m, 2H), 2.53-2.47 (m, 2H), 2.21-2.15 (m, 2H), 1.64 (s, 6H). <sup>13</sup>C NMR (126 MHz, CDCl<sub>3</sub>) δ 169.05, 146.30, 142.98, 128.11, 127.19, 124.60, 123.31, 80.28, 79.48, 39.58, 38.72, 30.21, 24.66. HRMS (ESI): calcd for C<sub>25</sub>H<sub>27</sub>N<sub>2</sub>O<sub>2</sub> [M+H]<sup>+</sup>: 387.2073, found 387.2065, [M+Na]<sup>+</sup>: 409.1892, found 409.1881.

#### 1.4. General procedure for synthesis of ligand **L4**

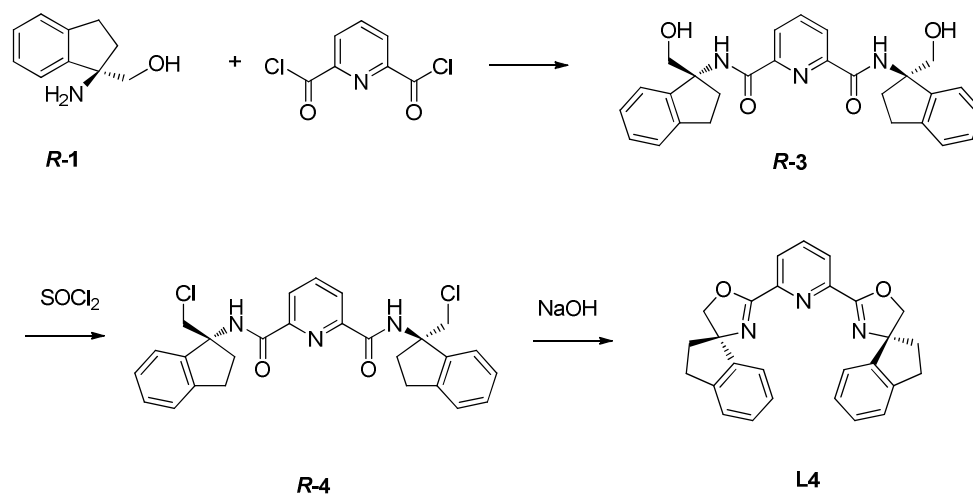

Pyridine-2,6-dicarboxylic acid (5 mmol) was treated with SOCl<sub>2</sub> (10 mL) at 80 °C over night. Excess SOCl<sub>2</sub> was then removed under reduced pressure to give the acid

chloride as a white solid (100% yield). A solution of crude 2,6-pyridine carbonyl dichloride in DCM was slowly added to a solution of *R*-1 (10 mmol) and triethylamine (30 mmol) in DCM (20 mL) at 0 °C for 2h. The reaction mixture was warmed to room temperature, SOCl<sub>2</sub> (20 mmol) was added. The mixture was heated to reflux for 2 h and then poured into ice water. The organic layer was washed with brine and Na<sub>2</sub>CO<sub>3</sub> aqueous and then dried over anhydrous Na<sub>2</sub>SO<sub>4</sub>. After evaporating the solvent, The solid was treated with alcohol (20 mL) and NaOH (40 mmol) at room temperature for 24h. The mixture was extracted with DCM and brine, the organic layer was dried over Na<sub>2</sub>SO<sub>4</sub>. After evaporating the solvent, the crude product was purified by chromatography with ether/ethyl acetate 2:1 (v/v) to give **L4** as white solid.

**2,6-Bis((*R*)-2,3-dihydro-5'*H*-spiro[indene-1,4'-oxazol]-2'-yl)pyridine (L4)**

White solid, m.p.: 177.1-176.4 °C,  $[\alpha]_D^{20} = +16.5$  (c = 0.3, MeOH), 47% yield. <sup>1</sup>H NMR (500 MHz, CDCl<sub>3</sub>) δ 8.28 (d, *J* = 7.8 Hz, 2H), 7.86 (t, *J* = 7.8 Hz, 1H), 7.25 (dd, *J* = 14.4, 2.5 Hz, 8H), 4.68 (d, *J* = 8.9 Hz, 2H), 4.61 (d, *J* = 8.8 Hz, 2H), 3.20-3.14 (m, 2H), 3.01-2.95 (m, 2H), 2.55-2.50 (m, 2H), 2.29-2.24 (m, 2H). <sup>13</sup>C NMR (126 MHz, CDCl<sub>3</sub>) δ 161.90, 146.81, 145.60, 143.40, 137.40, 128.39, 127.30, 126.27, 124.81, 123.46, 81.01, 79.19, 40.33, 30.23. HRMS (ESI): calcd for C<sub>27</sub>H<sub>23</sub>N<sub>3</sub>O<sub>2</sub> [M+H]<sup>+</sup> : 422.1869, found 422.1866, [M+Na]<sup>+</sup> : 444.1688, found 444.1679.

## 2. General procedure for asymmetric Mukaiyama-Mannich reaction

**L3** (2.3 mg, 0.006 mmol) and  $\text{Co}(\text{ClO}_4)_2 \cdot 6\text{H}_2\text{O}$  (1.8 mg, 0.005 mmol) were dissolved in  $\text{CHCl}_3$  (1.0 mL) in a Schlenk tube under an Ar atmosphere at room temperature for 1h. Then cyclic *N*-sulfonyl ketimino ester (0.1 mmol) was added and the mixture was stirred at 0 °C for 30 min before enol silyl ether (0.2 mmol) was added. The mixture was stirred at 0 °C until the reaction was completed (monitored by TLC). The solvent was removed under vacuum, and the residue was purified by chromatography on silica gel with petroleum ether/ethyl acetate 3:1 (v/v) to give the product.

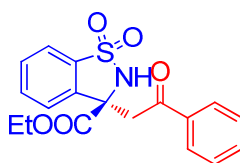

**(*R*)-ethyl 3-(2-oxo-2-phenylethyl)-2,3-dihydrobenzo[*d*]isothiazole-3-carboxylate 1,1-dioxide (1aa)** White solid, m.p.: 83.5-84.9 °C,  $[\alpha]_{\text{D}}^{20} = +155.7$  ( $c = 0.15$ , DCM), 98% yield and 99% ee, determined by chiral HPLC analysis (Chiralcel OD-H hexane/isopropanol, 80:20 v/v, 1.0 mL/min, UV 254 nm), retention times:  $t_{\text{r}} = 15.142$  min for (*S*)-isomer (minor),  $t_{\text{r}} = 19.892$  min for (*R*)-isomer (major).  $^1\text{H}$  NMR (400 MHz, Chloroform-*d*)  $\delta$  7.95-7.89 (m, 2H), 7.84 (dt,  $J = 7.6, 1.0$  Hz, 1H), 7.71 (d,  $J = 3.7$  Hz, 2H), 7.67-7.57 (m, 2H), 7.47 (t,  $J = 7.8$  Hz, 2H), 6.07 (s, 1H), 4.40-4.25 (m, 2H), 4.09 (d,  $J = 17.7$  Hz, 1H), 3.73 (d,  $J = 17.7$  Hz, 1H), 1.31 (t,  $J = 7.1$  Hz, 3H).  $^{13}\text{C}$  NMR (101 MHz,  $\text{CDCl}_3$ )  $\delta$  195.95, 169.61, 136.95, 135.62, 134.02, 133.66, 130.83, 128.81, 128.21, 124.25, 121.91, 65.48, 63.52,



49.16, 13.96. HRMS (ESI): calcd for C<sub>18</sub>H<sub>17</sub>NO<sub>5</sub>S [M+Na]<sup>+</sup> : 382.0725, found 382.0721.

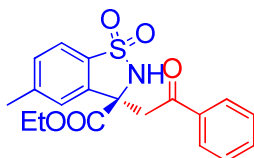

**(R)-ethyl 5-methyl-3-(2-oxo-2-phenylethyl)-2,3-dihydrobenzo[d]isothiazole-3-carboxylate 1,1-dioxide (1ba)** White solid, m.p.: 90.8-92.2 °C,  $[\alpha]_{\text{D}}^{20} = +134.6$  (c = 0.22, DCM), 98% yield and 99% ee, determined by chiral HPLC analysis (Chiralcel OD-H hexane/isopropanol, 80:20 v/v, 1.0 mL/min, UV 254 nm), retention times:  $t_{\text{r}} = 11.937$  min for (*S*)-isomer (minor),  $t_{\text{r}} = 16.372$  min for (*R*)-isomer (major). <sup>1</sup>H NMR (500 MHz, Chloroform-*d*)  $\delta$  7.85 (d,  $J = 7.7$  Hz, 2H), 7.64 (d,  $J = 8.0$  Hz, 1H), 7.53 (t,  $J = 7.4$  Hz, 1H), 7.45-7.33 (m, 4H), 5.96 (s, 1H), 4.32-4.16 (m, 1H), 4.25-4.18 (m, 1H), 4.02 (d,  $J = 17.7$  Hz, 1H), 3.63 (d,  $J = 17.7$  Hz, 1H), 2.43 (s, 3H), 1.25 (t,  $J = 7.1$  Hz, 3H). <sup>13</sup>C NMR (126 MHz, CDCl<sub>3</sub>)  $\delta$  196.09, 169.75, 144.88, 137.20, 135.62, 134.00, 132.85, 131.77, 128.79, 128.20, 124.39, 121.63, 65.32, 63.45, 49.31, 21.90, 13.97. HRMS (ESI): calcd for C<sub>19</sub>H<sub>19</sub>NO<sub>5</sub>S [M+Na]<sup>+</sup> :396.0082, found 396.0077.

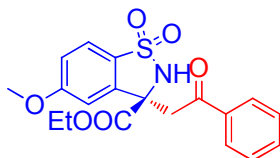

**(R)-ethyl 5-methoxy-3-(2-oxo-2-phenylethyl)-2,3-dihydrobenzo[d]isothiazole-3-carboxylate 1,1-dioxide (1ca)** White solid, m.p.: 144.1-145.6 °C,  $[\alpha]_{\text{D}}^{20} = +174.4$  (c = 0.35, DCM), 98% yield and 98% ee, determined by chiral HPLC analysis (Chiralcel OD-H hexane/isopropanol, 80:20 v/v, 1.0 mL/min, UV 254

nm), retention times:  $t_r = 15.062$  min for (*S*)-isomer (minor),  $t_r = 19.906$  min for (*R*)-isomer (major).  $^1\text{H}$  NMR (400 MHz, Chloroform-*d*)  $\delta$  7.91 (d,  $J = 7.0$  Hz, 2H), 7.73 (d,  $J = 8.2$  Hz, 1H), 7.60 (t,  $J = 7.4$  Hz, 1H), 7.47 (t,  $J = 7.7$  Hz, 2H), 7.12 (d,  $J = 8.2$  Hz, 2H), 6.03 (s, 1H), 4.43-4.24 (m, 2H), 4.05 (d,  $J = 17.7$  Hz, 1H), 3.91 (s, 3H), 3.74 (d,  $J = 17.7$  Hz, 1H), 1.32 (t,  $J = 7.1$  Hz, 3H).  $^{13}\text{C}$  NMR (101 MHz,  $\text{CDCl}_3$ )  $\delta$  195.97, 169.61, 163.94, 139.54, 135.63, 134.01, 128.81, 128.21, 127.58, 123.31, 117.24, 108.60, 65.17, 63.49, 56.06, 49.33, 14.02. HRMS (ESI): calcd for  $\text{C}_{19}\text{H}_{19}\text{NO}_6\text{S}$   $[\text{M}+\text{Na}]^+$ : 412.0831, found 412.0822

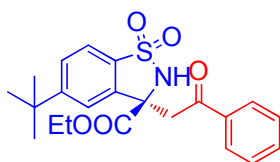

**(*R*)-ethyl 5-(*tert*-butyl)-3-(2-oxo-2-phenylethyl)-2,3-dihydrobenzo[*d*]isothiazole-3-carboxylate 1,1-dioxide (1da)** White solid, m.p.: 136.7-137.9 °C,  $[\alpha]_{\text{D}}^{20} = +136.9$  ( $c = 0.17$ , DCM), 97% yield and 98% ee, determined by chiral HPLC analysis (Chiralcel OD-H hexane/isopropanol, 80:20 v/v, 1.0 mL/min, UV 254 nm), retention times:  $t_r = 7.487$  min for (*S*)-isomer (minor),  $t_r = 13.062$  min for (*R*)-isomer (major).  $^1\text{H}$  NMR (500 MHz, Chloroform-*d*)  $\delta$  7.86 (d,  $J = 7.7$  Hz, 2H), 7.68 (d,  $J = 8.3$  Hz, 1H), 7.60 (d,  $J = 7.5$  Hz, 2H), 7.53 (t,  $J = 7.4$  Hz, 1H), 7.40 (t,  $J = 7.6$  Hz, 2H), 5.98 (s, 1H), 4.38-4.31 (m, 1H), 4.22-4.15 (m, 1H), 3.99 (d,  $J = 17.7$  Hz, 1H), 3.68 (d,  $J = 17.7$  Hz, 1H), 1.31 (s, 9H), 1.24 (t,  $J = 7.1$  Hz, 3H).  $^{13}\text{C}$  NMR (126 MHz,  $\text{CDCl}_3$ )  $\delta$  196.06, 169.75, 158.15, 137.08, 135.66, 133.99, 132.84, 128.79, 128.50, 128.24, 121.42, 120.61, 65.52, 63.33, 49.26, 35.63, 31.21, 14.05. HRMS (ESI): calcd for  $\text{C}_{22}\text{H}_{25}\text{NO}_5\text{S}$   $[\text{M}+\text{Na}]^+$ : 438.1351, found 438.1344.

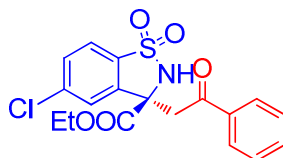

**(R)-ethyl 5-chloro-3-(2-oxo-2-phenylethyl)-2,3-dihydrobenzo[d]isothiazole-3-carboxylate 1,1-dioxide (1ea)** White solid, m.p.: 87.8-88.6 °C,  $[\alpha]_D^{20} = +139.3$  (c = 0.18, DCM), 99% yield and 99% ee, determined by chiral HPLC analysis (Chiralcel OD-H hexane/isopropanol, 80:20 v/v, 1.0 mL/min, UV 254 nm), retention times:  $t_r = 15.386$  min for (*S*)-isomer (minor),  $t_r = 21.657$  min for (*R*)-isomer (major).  $^1\text{H}$  NMR (500 MHz, Chloroform-*d*)  $\delta$  7.92 (d,  $J = 6.9$  Hz, 2H), 7.77 (d,  $J = 8.3$  Hz, 1H), 7.68 (d,  $J = 1.7$  Hz, 1H), 7.65-7.57 (m, 2H), 7.48 (t,  $J = 7.8$  Hz, 2H), 6.11 (s, 1H), 4.43-4.27 (m, 2H), 4.05 (d,  $J = 17.5$  Hz, 1H), 3.74 (d,  $J = 17.6$  Hz, 1H), 1.33 (t,  $J = 7.1$  Hz, 3H).  $^{13}\text{C}$  NMR (126 MHz,  $\text{CDCl}_3$ )  $\delta$  195.64, 169.11, 140.14, 139.00, 135.45, 134.21, 134.15, 131.33, 128.86, 128.23, 124.59, 123.11, 65.10, 63.83, 49.05, 13.96. HRMS (ESI): calcd for  $\text{C}_{18}\text{H}_{16}\text{ClNO}_5\text{S}$   $[\text{M}+\text{Na}]^+$ : 416.0335, found 416.0326.

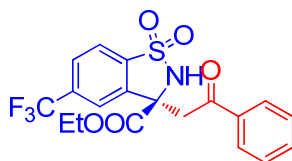

**(R)-ethyl 3-(2-oxo-2-phenylethyl)-5-(trifluoromethyl)-2,3-dihydrobenzo[d]isothiazole-3-carboxylate 1,1-dioxide (1fa)** White solid, m.p.: 99.3-100.7 °C,  $[\alpha]_D^{20} = +117.7$  (c = 0.32, DCM), 69% yield and 99% ee, determined by chiral HPLC analysis (Chiralcel OD-H hexane/isopropanol, 80:20 v/v, 1.0 mL/min, UV 254 nm), retention times:  $t_r = 8.895$  min for (*S*)-isomer (minor),  $t_r = 16.202$  min for (*R*)-isomer (major).  $^1\text{H}$  NMR (500 MHz,

Chloroform-*d*)  $\delta$  7.98 (d,  $J = 7.5$  Hz, 2H), 7.95-7.89 (m, 3H), 7.62 (t,  $J = 7.4$  Hz, 1H), 7.49 (t,  $J = 7.8$  Hz, 2H), 6.20 (s, 1H), 4.45-4.39 (m, 1H), 4.35-4.28 (m, 1H), 4.10 (d,  $J = 17.6$  Hz, 1H), 3.77 (d,  $J = 17.6$  Hz, 1H), 1.33 (t,  $J = 7.1$  Hz, 3H).  $^{13}\text{C}$  NMR (126 MHz,  $\text{CDCl}_3$ )  $\delta$  196.08, 169.50, 139.58, 138.62, 136.30 (d,  $J = 33.4$  Hz), 135.92, 134.77, 129.43, 128.80, 128.70 (q,  $J = 3.5$  Hz), 123.39, 122.44 (q,  $J = 274.7$  Hz), 122.29 (q,  $J = 3.8$  Hz), 65.94, 64.47, 49.50, 14.47. HRMS (ESI): calcd for  $\text{C}_{19}\text{H}_{16}\text{F}_3\text{NO}_5\text{S}$   $[\text{M}+\text{Na}]^+$  :450.0599, found 450.0591.

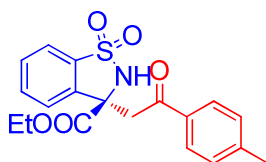

**(*R*)-ethyl 3-(2-oxo-2-(4-tolyl)ethyl)-2,3-dihydrobenzo[*d*]isothiazole-3-carboxylate 1,1-dioxide (1ab)** White solid, m.p.: 76.2-77.7 °C,  $[\alpha]_{\text{D}}^{20} = +47.9$  ( $c = 0.16$ , DCM), 99% yield and 96% ee, determined by chiral HPLC analysis (Chiralcel OD-H hexane/isopropanol, 80:20 v/v, 1.0 mL/min, UV 254 nm), retention times:  $t_{\text{r}} = 20.138$  min for (*S*)-isomer (minor),  $t_{\text{r}} = 22.912$  min for (*R*)-isomer (major).  $^1\text{H}$  NMR (500 MHz,  $\text{DMSO-}d_6$ )  $\delta$  8.42 (s, 1H), 7.81 (dd,  $J = 15.2, 8.0$  Hz, 3H), 7.75-7.68 (m, 2H), 7.64-7.59 (m, 1H), 7.26 (d,  $J = 8.0$  Hz, 2H), 4.25 (d,  $J = 18.1$  Hz, 1H), 4.09-3.99 (m, 2H), 3.53 (d,  $J = 18.5$  Hz, 1H), 2.30 (s, 3H), 1.05 (t,  $J = 7.0$  Hz, 3H).  $^{13}\text{C}$  NMR (126 MHz,  $\text{DMSO-}d_6$ )  $\delta$  195.59, 169.74, 144.36, 136.16, 135.04, 133.43, 133.03, 130.74, 129.31, 128.27, 124.76, 120.97, 64.91, 61.87, 49.09, 21.16, 13.72. HRMS (ESI): calcd for  $\text{C}_{19}\text{H}_{19}\text{NO}_5\text{S}$   $[\text{M}+\text{Na}]^+$  :396.0882, found 396.0877.

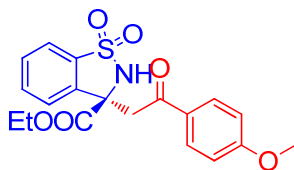

**(R)-ethyl 3-(2-(4-methoxyphenyl)-2-oxoethyl)-2,3-dihydrobenzo[d]isothiazole-3-carboxylate 1,1-dioxide (1ac)** White solid, m.p.: 66.3-67.6 °C,  $[\alpha]_{\text{D}}^{20} = +79.8$  (c = 0.12, DCM), 96% yield and 99% ee, determined by chiral HPLC analysis (Chiralcel OD-H hexane/isopropanol, 80:20 v/v, 1.0 mL/min, UV 254 nm), retention times:  $t_{\text{r}} = 22.639$  min for (*R*)-isomer (major),  $t_{\text{r}} = 29.657$  min for (*S*)-isomer (minor).  $^1\text{H}$  NMR (400 MHz, Chloroform-*d*)  $\delta$  7.89 (d,  $J = 8.9$  Hz, 2H), 7.84 (d,  $J = 7.4$  Hz, 1H), 7.70 (d,  $J = 2.5$  Hz, 2H), 7.66-7.62 (m, 1H), 6.93 (d,  $J = 8.9$  Hz, 2H), 6.07 (s, 1H), 4.40-4.23 (m, 2H), 4.04 (d,  $J = 17.5$  Hz, 1H), 3.88 (s, 3H), 3.68 (d,  $J = 17.5$  Hz, 1H), 1.31 (t,  $J = 7.1$  Hz, 3H).  $^{13}\text{C}$  NMR (101 MHz,  $\text{CDCl}_3$ )  $\delta$  194.36, 169.73, 164.20, 137.01, 135.59, 133.61, 130.76, 130.57, 128.71, 124.28, 121.86, 113.97, 65.60, 63.43, 55.56, 48.83, 13.96. HRMS (ESI): calcd for  $\text{C}_{19}\text{H}_{19}\text{NO}_6\text{S}$   $[\text{M}+\text{Na}]^+$ : 412.0831, found 412.0822.

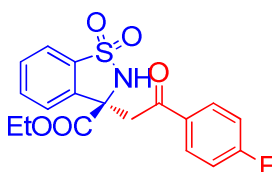

**(R)-ethyl 3-(2-(4-fluorophenyl)-2-oxoethyl)-2,3-dihydrobenzo[d]isothiazole-3-carboxylate 1,1-dioxide (1ad)** White solid, m.p.: 71.4-72.3 °C,  $[\alpha]_{\text{D}}^{20} = +123.9$  (c = 0.27, DCM), 93% yield and 97% ee, determined by chiral HPLC analysis (Chiralcel OD-H hexane/isopropanol, 80:20 v/v, 1.0 mL/min, UV 254 nm), retention times:  $t_{\text{r}} = 13.268$  min for (*R*)-isomer (major),  $t_{\text{r}} = 19.243$  min for

(*S*)-isomer (minor).  $^1\text{H}$  NMR (400 MHz, Chloroform-*d*)  $\delta$  7.99-7.92 (m, 2H), 7.84 (d,  $J = 7.5$  Hz, 1H), 7.70 (d,  $J = 4.4$  Hz, 2H), 7.68-7.62 (m, 1H), 7.14 (t,  $J = 8.6$  Hz, 2H), 6.05 (s, 1H), 4.41-4.25 (m, 2H), 4.04 (d,  $J = 17.6$  Hz, 1H), 3.70 (d,  $J = 17.6$  Hz, 1H), 1.32 (t,  $J = 7.1$  Hz, 3H).  $^{13}\text{C}$  NMR (126 MHz,  $\text{CDCl}_3$ )  $\delta$  194.37, 169.51, 166.25 (d,  $J = 256.5$  Hz), 136.88, 135.65, 133.68, 132.12 (d,  $J = 3.0$  Hz), 130.99, 130.90 (d,  $J = 5.5$  Hz), 124.21, 121.92, 116.02 (d,  $J = 22.0$  Hz), 65.44, 63.58, 49.00, 13.96. HRMS (ESI): calcd for  $\text{C}_{18}\text{H}_{16}\text{FNO}_5\text{S}$   $[\text{M}+\text{Na}]^+$ : 400.0631, found 400.0623.

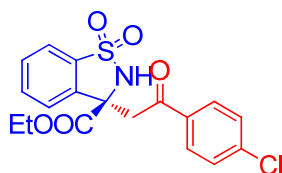

**(*R*)-ethyl 3-(2-(4-chlorophenyl)-2-oxoethyl)-2,3-dihydrobenzo[*d*]isothiazole-3-carboxylate 1,1-dioxide (1ae)** White solid, m.p.: 88.1-89.3 °C,  $[\alpha]_{\text{D}}^{20} = +119.1$  ( $c = 0.35$ , DCM), 98% yield and 97% ee, determined by chiral HPLC analysis (Chiralcel OD-H hexane/isopropanol, 80:20 v/v, 1.0 mL/min, UV 254 nm), retention times:  $t_{\text{r}} = 15.342$  min for (*R*)-isomer (major),  $t_{\text{r}} = 21.386$  min for (*S*)-isomer (minor).  $^1\text{H}$  NMR (400 MHz, Chloroform-*d*)  $\delta$  7.89-7.81 (m, 3H), 7.70 (d,  $J = 3.1$  Hz, 2H), 7.67-7.63 (m, 1H), 7.45 (d,  $J = 8.3$  Hz, 2H), 6.05 (s, 1H), 4.41-4.25 (m, 2H), 4.03 (d,  $J = 17.6$  Hz, 1H), 3.69 (d,  $J = 17.4$  Hz, 1H), 1.31 (t,  $J = 7.1$  Hz, 3H).  $^{13}\text{C}$  NMR (101 MHz,  $\text{CDCl}_3$ )  $\delta$  194.79, 169.46, 140.59, 136.84, 135.63, 133.95, 133.71, 130.90, 129.62, 129.17, 124.22, 121.92, 65.40, 63.61, 49.03, 13.97. HRMS (ESI): calcd for  $\text{C}_{18}\text{H}_{16}\text{ClNO}_5\text{S}$   $[\text{M}+\text{Na}]^+$ : 416.0335, found 416.0329.

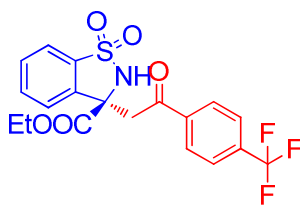

**(R)-ethyl 3-(2-oxo-2-(4-(trifluoromethyl)phenyl)ethyl)-2,3-dihydrobenzo[d]isothiazole-3-carboxylate 1,1-dioxide (1af)** White solid, m.p.: 54.4-55.6 °C,  $[\alpha]_D^{20} = +106.3$  ( $c = 0.22$ , DCM), 85% yield and 99% ee, determined by chiral HPLC analysis (Chiralcel OD-H hexane/isopropanol, 80:20 v/v, 1.0 mL/min, UV 254 nm), retention times:  $t_r = 15.730$  min for (*R*)-isomer (major),  $t_r = 21.503$  min for (*S*)-isomer (minor).  $^1\text{H NMR}$  (500 MHz, Chloroform-*d*)  $\delta$  7.96 (d,  $J = 8.2$  Hz, 2H), 7.78 (d,  $J = 7.7$  Hz, 1H), 7.67 (d,  $J = 8.2$  Hz, 2H), 7.64 (d,  $J = 2.5$  Hz, 2H), 7.61-7.57 (m, 1H), 5.99 (s, 1H), 4.35-4.20 (m, 2H), 3.99 (d,  $J = 17.7$  Hz, 1H), 3.68 (d,  $J = 17.8$  Hz, 1H), 1.25 (t,  $J = 7.1$  Hz, 3H).  $^{13}\text{C NMR}$  (126 MHz,  $\text{CDCl}_3$ )  $\delta$  194.65, 168.84, 137.75, 136.29, 135.18, 134.71 (q,  $J = 32.6$  Hz), 133.26, 130.47, 128.10, 125.40 (q,  $J = 3.8$  Hz), 123.69, 122.91 (q,  $J = 273.4$  Hz), 121.45, 64.83, 63.20, 48.73, 13.46. HRMS (ESI): calcd for  $\text{C}_{19}\text{H}_{16}\text{F}_3\text{NO}_5\text{S}$   $[\text{M}+\text{Na}]^+$ : 450.0599, found 450.0592.

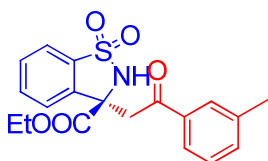

**(R)-ethyl 3-(2-oxo-2-(3-tolyl)ethyl)-2,3-dihydrobenzo[d]isothiazole-3-carboxylate 1,1-dioxide (1ag)** White solid, m.p.: 77.9-79.3 °C,  $[\alpha]_D^{20} = +122.1$  ( $c = 0.28$ , DCM), 99% yield and 94% ee, determined by chiral HPLC analysis (Chiralcel OD-H hexane/isopropanol, 80:20 v/v, 1.0 mL/min, UV 254 nm), retention times:  $t_r = 15.028$  min for (*S*)-isomer (minor),  $t_r = 24.494$  min for (*R*)-isomer (major).  $^1\text{H NMR}$  (500 MHz,  $\text{DMSO}-d_6$ )  $\delta$  8.54 (s, 1H), 7.92-7.78 (m,

5H), 7.75-7.69 (m, 1H), 7.51 (d,  $J = 7.5$  Hz, 1H), 7.44 (t,  $J = 7.6$  Hz, 1H), 4.37 (d,  $J = 18.4$  Hz, 1H), 4.20-4.19 (m, 2H), 3.66 (d,  $J = 18.4$  Hz, 1H), 2.38 (s, 3H), 1.15 (t,  $J = 7.1$  Hz, 3H).  $^{13}\text{C}$  NMR (126 MHz,  $\text{DMSO-}d_6$ )  $\delta$  196.65, 170.21, 138.75, 136.66, 135.99, 135.55, 134.92, 133.94, 131.26, 129.19, 129.16, 125.76, 125.27, 121.48, 65.39, 62.39, 49.75, 21.23, 14.23. HRMS (ESI): calcd for  $\text{C}_{19}\text{H}_{19}\text{NO}_5\text{S}$   $[\text{M}+\text{Na}]^+$ : 396.0882, found 396.0877.

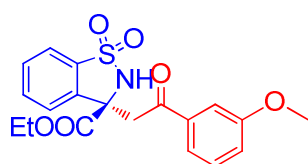

**(*R*)-ethyl 3-(2-(3-methoxyphenyl)-2-oxoethyl)-2,3-dihydrobenzo[*d*]isothiazole-3-carboxylate 1,1-dioxide (1ah)** White solid, m.p.: 65.1-66.5 °C,  $[\alpha]_{\text{D}}^{20} = +159.5$  ( $c = 0.13$ , DCM), 98% yield and 95% ee, determined by chiral HPLC analysis (Chiralcel OD-H hexane/isopropanol, 70:30 v/v, 1.0 mL/min, UV 254 nm), retention times:  $t_{\text{r}} = 13.381$  min for (*S*)-isomer (minor),  $t_{\text{r}} = 40.464$  min for (*R*)-isomer (major).  $^1\text{H}$  NMR (500 MHz,  $\text{DMSO-}d_6$ )  $\delta$  8.53 (s, 1H), 7.89 (d,  $J = 7.7$  Hz, 1H), 7.82 (q,  $J = 8.2$  Hz, 2H), 7.73 (d,  $J = 6.8$  Hz, 1H), 7.61 (d,  $J = 7.7$  Hz, 1H), 7.48 (dd,  $J = 17.1, 9.1$  Hz, 2H), 7.26 (dd,  $J = 8.2, 2.7$  Hz, 1H), 4.39 (d,  $J = 18.5$  Hz, 1H), 4.20-4.09 (m, 2H), 3.83 (s, 3H), 3.69 (d,  $J = 18.6$  Hz, 1H), 1.15 (t,  $J = 7.1$  Hz, 3H).  $^{13}\text{C}$  NMR (126 MHz,  $\text{DMSO-}d_6$ )  $\delta$  196.47, 170.23, 159.93, 137.35, 136.61, 135.54, 133.94, 131.26, 130.45, 125.29, 121.48, 121.14, 120.58, 112.95, 65.42, 62.40, 55.87, 49.77, 14.22. HRMS (ESI): calcd for  $\text{C}_{19}\text{H}_{19}\text{NO}_6\text{S}$   $[\text{M}+\text{Na}]^+$ : 412.0831, found 412.0823.



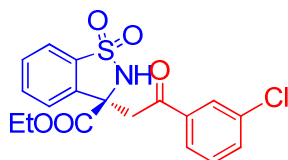

**(R)-ethyl 3-(2-(3-chlorophenyl)-2-oxoethyl)-2,3-dihydrobenzo[d]isothiazole-3-carboxylate 1,1-dioxide (1ai)** White solid, m.p.: 81.1-82.7 °C,  $[\alpha]_D^{20} = +109.8$  (c = 0.16, DCM), 97% yield and 95% ee, determined by chiral HPLC analysis (Chiralcel OD-H hexane/isopropanol, 80:20 v/v, 1.0 mL/min, UV 254 nm), retention times:  $t_r = 21.784$  min for (*S*)-isomer (minor),  $t_r = 33.071$  min for (*R*)-isomer (major).  $^1\text{H}$  NMR (400 MHz, Chloroform-*d*)  $\delta$  7.89 (s, 1H), 7.84 (d,  $J = 7.9$  Hz, 1H), 7.79 (d,  $J = 7.9$  Hz, 1H), 7.70 (d,  $J = 2.9$  Hz, 2H), 7.67-7.63 (m, 1H), 7.58 (d,  $J = 8.0$  Hz, 1H), 7.42 (t,  $J = 7.8$  Hz, 1H), 6.04 (s, 1H), 4.41-4.25 (m, 2H), 4.04 (d,  $J = 17.7$  Hz, 1H), 3.70 (d,  $J = 17.7$  Hz, 1H), 1.32 (t,  $J = 7.1$  Hz, 3H).  $^{13}\text{C}$  NMR (101 MHz,  $\text{CDCl}_3$ )  $\delta$  194.77, 169.40, 137.09, 136.80, 135.66, 135.21, 133.93, 133.73, 130.92, 130.18, 128.31, 126.30, 124.22, 121.94, 65.34, 63.64, 49.16, 13.97. HRMS (ESI): calcd for  $\text{C}_{18}\text{H}_{16}\text{ClNO}_5\text{S}$   $[\text{M}+\text{Na}]^+$ : 416.0335, found 416.0326.

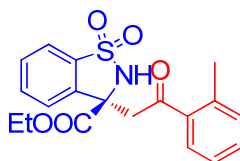

**(R)-ethyl 3-(2-(2-tolylethyl)-2-oxoethyl)-2,3-dihydrobenzo[d]isothiazole-3-carboxylate 1,1-dioxide (1aj)** White solid, m.p.: 66.7-67.7 °C,  $[\alpha]_D^{20} = +102.9$  (c = 0.37, DCM), 95% yield and 97% ee, determined by chiral HPLC analysis (Chiralcel OD-H hexane/isopropanol, 80:20 v/v, 1.0 mL/min, UV 254 nm), retention times:  $t_r = 11.334$  min for (*S*)-isomer (minor),  $t_r = 16.863$  min for (*R*)-isomer (major).  $^1\text{H}$  NMR (400 MHz, Chloroform-*d*)  $\delta$  7.83 (d,  $J = 7.6$  Hz, 1H),

7.72-7.60 (m, 4H), 7.41 (t,  $J = 7.5$  Hz, 1H), 7.31-7.21 (m, 2H), 6.09 (s, 1H), 4.41-4.27 (m, 2H), 4.04 (d,  $J = 17.7$  Hz, 1H), 3.65 (d,  $J = 17.7$  Hz, 1H), 2.53 (s, 3H), 1.33 (t,  $J = 7.2$  Hz, 3H).  $^{13}\text{C}$  NMR (101 MHz,  $\text{CDCl}_3$ )  $\delta$  198.81, 169.33, 138.80, 136.63, 135.35, 135.26, 133.24, 131.97, 131.93, 130.39, 128.67, 125.48, 123.85, 121.51, 65.32, 63.11, 51.03, 21.20, 13.62. HRMS (ESI): calcd for  $\text{C}_{19}\text{H}_{19}\text{NO}_5\text{S}$   $[\text{M}+\text{Na}]^+$ : 396.0882, found 396.0877.

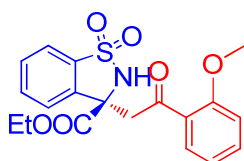

**(*R*)-ethyl 3-(2-(2-methoxyphenyl)-2-oxoethyl)-2,3-dihydrobenzo[*d*]isothiazole-1,1-dioxide-3-carboxylate (1ak)** White solid, m.p.: 99.7-100.8 °C,  $[\alpha]_{\text{D}}^{20} = +143.6$  ( $c = 0.23$ , DCM), 98% yield and 95% ee, determined by chiral HPLC analysis (Chiralcel AD-H hexane/isopropanol, 70:30 v/v, 1.0 mL/min, UV 254 nm), retention times:  $t_{\text{r}} = 38.396$  min for (*S*)-isomer (minor),  $t_{\text{r}} = 50.468$  min for (*R*)-isomer (major).  $^1\text{H}$  NMR (500 MHz, Chloroform-*d*)  $\delta$  7.86 (dd,  $J = 7.9, 1.9$  Hz, 1H), 7.82 (d,  $J = 7.7$  Hz, 1H), 7.69 (d,  $J = 5.6$  Hz, 2H), 7.64-7.61 (m 1H), 7.54-7.47 (m, 1H), 7.03 (t,  $J = 7.6$  Hz, 1H), 6.96 (d,  $J = 8.3$  Hz, 1H), 6.05 (s, 1H), 4.38-4.24 (m, 2H), 4.12 (d,  $J = 18.4$  Hz, 1H), 3.86 (s, 3H), 3.74 (d,  $J = 18.6$  Hz, 1H), 1.30 (t,  $J = 7.1$  Hz, 3H).  $^{13}\text{C}$  NMR (126 MHz,  $\text{CDCl}_3$ )  $\delta$  196.32, 169.48, 158.98, 136.71, 135.03, 134.51, 133.07, 130.41, 130.11, 125.26, 123.88, 121.29, 120.35, 111.19, 65.42, 62.77, 55.07, 54.01, 13.48. HRMS (ESI): calcd for  $\text{C}_{19}\text{H}_{19}\text{NO}_6\text{S}$   $[\text{M}+\text{Na}]^+$ : 412.0831, found 412.0822.

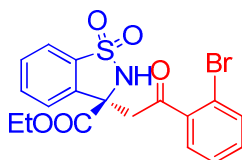

**(R)-ethyl 3-(2-(2-bromophenyl)-2-oxoethyl)-2,3-dihydrobenzo[d]isothiazole-3-carboxylate 1,1-dioxide (1a)** White solid, m.p.: 75.4-77.1 °C,  $[\alpha]_D^{20} = +110.7$  (c = 0.22, DCM), 93% yield and 96% ee, determined by chiral HPLC analysis (Chiralcel OD-H hexane/isopropanol, 80:20 v/v, 1.0 mL/min, UV 254 nm), retention times:  $t_r = 18.290$  min for (*S*)-isomer (minor),  $t_r = 36.347$  min for (*R*)-isomer (major).  $^1\text{H}$  NMR (400 MHz, Chloroform-*d*)  $\delta$  7.82 (d,  $J = 7.5$  Hz, 1H), 7.68 (d,  $J = 4.2$  Hz, 2H), 7.63 (dd,  $J = 8.0, 4.3$  Hz, 2H), 7.52 (dd,  $J = 7.7, 1.8$  Hz, 1H), 7.39 (t,  $J = 7.5$  Hz, 1H), 7.33 (td,  $J = 7.6, 1.8$  Hz, 1H), 6.07 (s, 1H), 4.43-4.32 (m, 2H), 4.09 (d,  $J = 17.9$  Hz, 1H), 3.67 (d,  $J = 18.0$  Hz, 1H), 1.36 (t,  $J = 7.1$  Hz, 3H).  $^{13}\text{C}$  NMR (101 MHz,  $\text{CDCl}_3$ )  $\delta$  199.11, 169.28, 139.34, 136.84, 135.65, 134.10, 133.68, 132.56, 130.86, 129.32, 127.63, 124.20, 121.88, 119.12, 65.54, 63.74, 52.29, 14.04. HRMS (ESI): calcd for  $\text{C}_{18}\text{H}_{16}\text{BrNO}_5\text{S}$   $[\text{M}+\text{Na}]^+$ : 459.9830, found 459.9821.

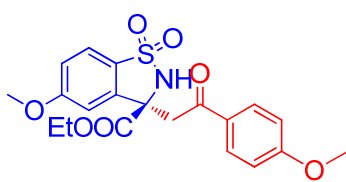

**(R)-ethyl 5-methoxy-3-(2-(4-methoxyphenyl)-2-oxoethyl)-2,3-dihydrobenzo[d]isothiazole-3-carboxylate 1,1-dioxide (1am)** White solid, m.p.: 131.1-132.3 °C,  $[\alpha]_D^{20} = +147.7$  (c = 0.14, DCM), 97% yield and 97% ee, determined by chiral HPLC analysis (Chiralcel OD-H hexane/isopropanol, 80:20 v/v, 1.0 mL/min, UV 254 nm), retention times:  $t_r = 18.830$  min for (*R*)-isomer (major),  $t_r = 28.530$  min for (*S*)-isomer (minor).  $^1\text{H}$  NMR (500 MHz,

DMSO-*d*<sub>6</sub>)  $\delta$  8.29 (s, 1H), 7.98 (d,  $J$  = 8.4 Hz, 2H), 7.78 (d,  $J$  = 8.5 Hz, 1H), 7.27 (s, 1H), 7.23 (d,  $J$  = 8.7 Hz, 1H), 7.05 (d,  $J$  = 8.4 Hz, 2H), 4.38 (d,  $J$  = 18.3 Hz, 1H), 4.24-4.04 (m, 2H), 3.89 (s, 3H), 3.85 (s, 3H), 3.56 (d,  $J$  = 18.3 Hz, 1H), 1.15 (t,  $J$  = 7.0 Hz, 3H). <sup>13</sup>C NMR (126 MHz, DMSO-*d*<sub>6</sub>)  $\delta$  194.93, 170.25, 164.08, 163.50, 139.34, 131.05, 128.98, 127.66, 122.99, 117.89, 114.44, 109.36, 65.21, 62.31, 56.53, 56.08, 49.49, 14.28. HRMS (ESI): calcd for C<sub>20</sub>H<sub>21</sub>NO<sub>7</sub>S [M+Na]<sup>+</sup> : 442.0936, found 442.0929.

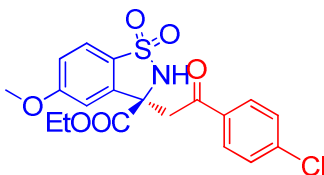

**(*R*)-ethyl 3-(2-(4-chlorophenyl)-2-oxoethyl)-5-methoxy-2,3-dihydrobenzo[*d*]isothiazole-3-carboxylate 1,1-dioxide (1an)** White solid, m.p.: 103.8-104.9 °C,  $[\alpha]_D^{20}$  = +139.2 (c = 0.35, DCM), 98% yield and 99% ee, determined by chiral HPLC analysis (Chiralcel OD-H hexane/isopropanol, 80:20 v/v, 1.0 mL/min, UV 254 nm), retention times:  $t_r$  = 16.984 min for (*S*)-isomer (minor),  $t_r$  = 20.709 min for (*R*)-isomer (major). <sup>1</sup>H NMR (500 MHz, DMSO-*d*<sub>6</sub>)  $\delta$  8.26 (s, 1H), 7.94 (d,  $J$  = 8.5 Hz, 2H), 7.70 (d,  $J$  = 8.6 Hz, 1H), 7.54 (d,  $J$  = 8.6 Hz, 2H), 7.20 (d,  $J$  = 2.3 Hz, 1H), 7.14 (dd,  $J$  = 8.6, 2.3 Hz, 1H), 4.39 (d,  $J$  = 18.8 Hz, 1H), 4.12-3.95 (m, 2H), 3.80 (s, 3H), 3.54 (d,  $J$  = 18.5 Hz, 1H), 1.05 (t,  $J$  = 7.1 Hz, 3H). <sup>13</sup>C NMR (126 MHz, DMSO-*d*<sub>6</sub>)  $\delta$  195.75, 170.14, 163.53, 139.26, 134.70, 130.60, 129.39, 127.62, 123.01, 117.96, 109.35, 65.09, 62.40, 56.55, 49.65, 14.27. HRMS (ESI): calcd for C<sub>19</sub>H<sub>18</sub>ClNO<sub>6</sub>S [M+Na]<sup>+</sup> : 446.0441, found 446.0433

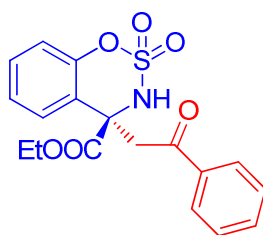

**(R)-ethyl 4-(2-oxo-2-phenylethyl)-3,4-dihydrobenzo[e][1,2,3]oxathiazine-4-carboxylate 2,2-dioxide (1ga)** White solid, m.p.: 97.7-98.5 °C,  $[\alpha]_D^{20} = -33.1$  (c = 0.35, DCM), 83% yield and 73% ee, determined by chiral HPLC analysis (Chiralcel AD-H hexane/isopropanol, 80:20 v/v, 1.0 mL/min, UV 254 nm), retention times:  $t_r = 21.361$  min for (*R*)-isomer (major),  $t_r = 30.033$  min for (*S*)-isomer (minor).  $^1\text{H}$  NMR (500 MHz, Chloroform-*d*)  $\delta$  7.94 (d,  $J = 8.5$  Hz, 2H), 7.65 (d,  $J = 8.1$  Hz, 1H), 7.60 (t,  $J = 7.4$  Hz, 1H), 7.48 (t,  $J = 7.8$  Hz, 2H), 7.44-7.38 (m, 1H), 7.27 (d,  $J = 7.6$  Hz, 2H), 7.09 (d,  $J = 8.2$  Hz, 1H), 6.43 (s, 1H), 4.56 (d,  $J = 17.9$  Hz, 1H), 4.37 (q,  $J = 7.1$  Hz, 2H), 3.83 (d,  $J = 17.9$  Hz, 1H), 1.32 (t,  $J = 7.1$  Hz, 3H).  $^{13}\text{C}$  NMR (126 MHz,  $\text{CDCl}_3$ )  $\delta$  195.23, 169.43, 150.74, 135.96, 133.87, 130.89, 128.80, 128.19, 127.31, 125.85, 120.03, 119.45, 99.99, 65.27, 63.94, 47.07, 13.90. HRMS (ESI): calcd for  $\text{C}_{18}\text{H}_{17}\text{NO}_6\text{S}$   $[\text{M}+\text{Na}]^+$ : 398.0674, found 398.066.

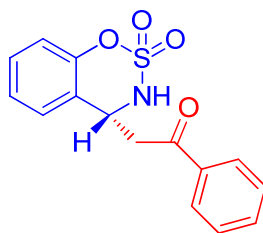

**(R)-2-(2,2-dioxido-3,4-dihydrobenzo[e][1,2,3]oxathiazin-4-yl)-1-phenylethanone (1ha)** White solid, m.p.: 79.2-81.1 °C,  $[\alpha]_D^{20} = -11.2$  (c = 0.35, DCM), 56% yield and 16% ee, determined by chiral HPLC analysis (Chiralcel OD-H hexane/isopropanol, 80:20 v/v, 1.0 mL/min, UV 254 nm), retention times:  $t_r =$

12.003 min for (*R*)-isomer (major),  $t_r = 14.367$  min for (*S*)-isomer (minor).  $^1\text{H}$  NMR (500 MHz, Chloroform-*d*)  $\delta$  7.98 (d,  $J = 6.9$  Hz, 2H), 7.63 (t,  $J = 7.4$  Hz, 1H), 7.50 (t,  $J = 7.7$  Hz, 2H), 7.34-7.31 (m 1H), 7.15 (d,  $J = 4.4$  Hz, 2H), 7.07 (d,  $J = 8.3$  Hz, 1H), 5.84 (d,  $J = 8.2$  Hz, 1H), 5.42 (td,  $J = 7.6, 3.7$  Hz, 1H), 4.29 (dd,  $J = 18.2, 7.2$  Hz, 1H), 3.43 (dd,  $J = 18.2, 3.8$  Hz, 1H).  $^{13}\text{C}$  NMR (126 MHz,  $\text{CDCl}_3$ )  $\delta$  197.77, 151.24, 136.14, 134.16, 129.62, 128.92, 128.25, 125.95, 125.47, 121.61, 119.14, 53.67, 41.80. HRMS (ESI): calcd for  $\text{C}_{15}\text{H}_{13}\text{NO}_4\text{S}$   $[\text{M}+\text{Na}]^+$ : 326.0463, found 326.0459.

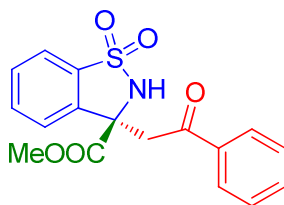

**(*R*)-methyl 3-(2-oxo-2-phenylethyl)-2,3-dihydrobenzo[*d*]isothiazole**

**-3-carboxylate 1,1-dioxide (1ia)** White solid, m.p.: 129.4-130.5 °C,  $[\alpha]_{\text{D}}^{20} = +109.4$  ( $c = 0.53$ , DCM), 98% yield and 98% ee, determined by chiral HPLC analysis (Chiralcel AD-H hexane/isopropanol, 80:20 v/v, 1.0 mL/min, UV 254 nm), retention times:  $t_r = 22.754$  min for (*S*)-isomer (minor),  $t_r = 44.140$  min (major) for (*R*)-isomer.  $^1\text{H}$  NMR (500 MHz, Chloroform-*d*)  $\delta$  7.91 (d,  $J = 4.9$  Hz, 2H), 7.84 (dd,  $J = 7.7, 3.4$  Hz, 1H), 7.71 (t,  $J = 3.9$  Hz, 2H), 7.67-7.64 (m, 1H), 7.60 (q,  $J = 4.4$  Hz, 1H), 7.49-7.45 (m, 2H), 6.09 (s, 1H), 4.12 (dd,  $J = 17.8, 3.5$  Hz, 1H), 3.86 (d,  $J = 3.6$  Hz, 3H), 3.73 (dd,  $J = 17.8, 3.5$  Hz, 1H).  $^{13}\text{C}$  NMR (126 MHz,  $\text{CDCl}_3$ )  $\delta$  196.11, 170.25, 136.64, 135.50, 134.10, 133.74, 130.90, 128.82, 128.24, 126.42, 124.31, 121.91, 65.43, 54.15, 49.28. HRMS (ESI): calcd for  $\text{C}_{17}\text{H}_{15}\text{NO}_5\text{S}$   $[\text{M}+\text{Na}]^+$ : 368.0569, found 368.0568.

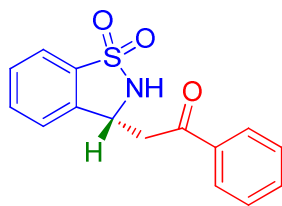

**(R)-2-(1,1-dioxido-2,3-dihydrobenzo[d]isothiazol-3-yl)-1-phenylethanone (1ja)**

White solid, m.p.: 158.5-159.8 °C,  $[\alpha]_D^{20} = +139.2$  ( $c = 0.35$ , DCM), 94% yield and 66% ee, determined by chiral HPLC analysis (Chiralcel AD-H hexane/isopropanol, 80:20 v/v, 1.0 mL/min, UV 254 nm), retention times:  $t_r = 38.289$  min for (*S*)-isomer (minor),  $t_r = 46.120$  min (major) for (*R*)-isomer.  $^1\text{H}$  NMR (500 MHz, DMSO- $d_6$ )  $\delta$  8.00-7.86 (m, 3H), 7.74 (d,  $J = 7.8$  Hz, 1H), 7.67-7.60 (m, 2H), 7.58 (t,  $J = 7.3$  Hz, 1H), 7.53-7.49 (m, 1H), 7.46 (t,  $J = 7.8$  Hz, 2H), 5.11 (dd,  $J = 9.1, 4.3$  Hz, 1H), 3.61 (dd,  $J = 17.7, 3.2$  Hz, 1H), 3.41 (dd,  $J = 17.7, 9.6$  Hz, 1H).  $^{13}\text{C}$  NMR (126 MHz, DMSO- $d_6$ )  $\delta$  196.87, 140.55, 136.36, 136.27, 133.51, 132.88, 129.29, 128.89, 128.76, 128.08, 125.53, 125.08, 120.47, 52.75, 44.67. HRMS (ESI): calcd for  $\text{C}_{15}\text{H}_{13}\text{NO}_3\text{S}$   $[\text{M}+\text{Na}]^+$ : 310.0514, found 310.0506.

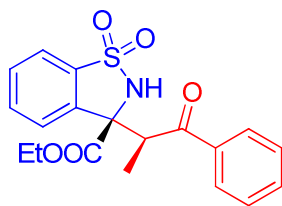

**(R)-ethyl 3-((S)-1-oxo-1-phenylpropan-2-yl)-2,3-dihydrobenzo[d]isothiazole-3-carboxylate 1,1-dioxide (1ap)** White solid, m.p.: 97.6-98.8 °C,  $[\alpha]_D^{20} = +50.3$  ( $c = 0.10$ , DCM), 37% yield and 94% ee, determined by chiral HPLC analysis (Chiralcel OD-H hexane/isopropanol, 90:10 v/v, 1.0 mL/min, UV 254 nm), retention times:  $t_r = 16.675$  min for (*S*)-isomer (minor),  $t_r = 22.439$  min for (*R*)-isomer (major).  $^1\text{H}$  NMR (500 MHz, Chloroform- $d$ )  $\delta$  7.93 (d,  $J = 8.4$  Hz, 2H),

7.81 (t,  $J = 7.2$  Hz, 2H), 7.65-7.56 (m, 3H), 7.46 (t,  $J = 7.7$  Hz, 2H), 6.14 (s, 1H), 4.44 (q,  $J = 7.1$  Hz, 2H), 4.27 (q,  $J = 7.4$  Hz, 1H), 1.49 (d,  $J = 7.4$  Hz, 3H), 1.42 (t,  $J = 7.1$  Hz, 3H).  $^{13}\text{C}$  NMR (126 MHz,  $\text{CDCl}_3$ )  $\delta$  201.14, 169.13, 137.32, 137.30, 135.74, 133.69, 132.67, 130.57, 128.84, 128.62, 126.41, 121.68, 68.92, 63.53, 50.32, 14.73, 14.07. HRMS (ESI): calcd for  $\text{C}_{19}\text{H}_{19}\text{NO}_5\text{S}$   $[\text{M}+\text{Na}]^+$  : 396.0882, found 396.0878.

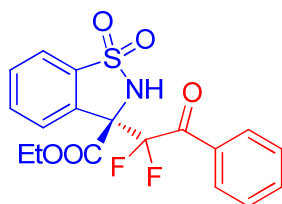

**(R)-ethyl 3-(1,1-difluoro-2-oxo-2-phenylethyl)-2,3-dihydrobenzo[d]isothiazole-3-carboxylate 1,1-dioxide (1aq)** White solid, m.p.: 115.3-117.1 °C,  $[\alpha]_{\text{D}}^{20} = +56.7$  ( $c = 0.25$ , DCM), 44% yield and 64% ee, determined by chiral HPLC analysis (Chiralcel AD-H hexane/isopropanol, 70:30 v/v, 1.0 mL/min, UV 254 nm), retention times:  $t_{\text{r}} = 13.623$  min for (*S*)-isomer (minor),  $t_{\text{r}} = 20.114$  min for (*R*)-isomer (major).  $^1\text{H}$  NMR (500 MHz, Chloroform-*d*)  $\delta$  8.09 (d,  $J = 7.8$  Hz, 2H), 7.98-7.93 (m, 1H), 7.87 (d,  $J = 8.5$  Hz, 1H), 7.78-7.72 (m, 2H), 7.67 (t,  $J = 7.4$  Hz, 1H), 7.51 (t,  $J = 7.8$  Hz, 2H), 5.98 (s, 1H), 4.44-4.37 (m, 2H), 1.35 (t,  $J = 7.1$  Hz, 3H).  $^{13}\text{C}$  NMR (126 MHz,  $\text{CDCl}_3$ )  $\delta$  187.80 (dd,  $J = 32.1, 28.8$  Hz), 165.61 (dd,  $J = 7.4, 2.2$  Hz), 136.63, 135.26, 133.63, 131.84, 131.18 (t,  $J = 3.2$  Hz), 130.44 (dd,  $J = 4.1, 2.2$  Hz), 130.35 (d,  $J = 1.8$  Hz), 128.87, 127.06 (d,  $J = 5.6$  Hz), 121.98, 115.43 (t,  $J = 269.8$  Hz), 68.55 (dd,  $J = 26.0, 23.8$  Hz), 64.44, 13.88. HRMS (ESI): calcd for  $\text{C}_{18}\text{H}_{15}\text{F}_2\text{NO}_5\text{S}$   $[\text{M}+\text{Na}]^+$  : 418.0537, found 418.0531.



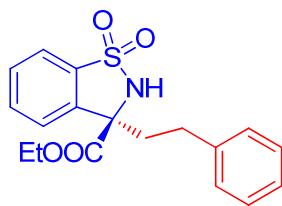

**(R)-ethyl 3-phenethyl-2,3-dihydrobenzo[d]isothiazole-3-carboxylate**

**1,1-dioxide (4)** White solid, m.p.: 74.1-75.5 °C,  $[\alpha]_D^{20} = +46.9$  (c = 0.25, DCM), 72% yield and 97% ee, determined by chiral HPLC analysis (Chiralcel OD-H hexane/isopropanol, 70:30 v/v, 0.8 mL/min, UV 254 nm), retention times:  $t_r = 9.739$  min for (*R*)-isomer (major),  $t_r = 14.089$  min (minor) for (*S*)-isomer.  $^1\text{H}$  NMR (500 MHz, Chloroform-*d*)  $\delta$  7.58 (d,  $J = 7.9$  Hz, 1H), 7.39 (s, 1H), 7.30 (d,  $J = 8.0$  Hz, 1H), 7.21-7.16 (m, 2H), 7.10 (dd,  $J = 15.2, 7.2$  Hz, 3H), 5.74 (s, 1H), 4.27-4.13 (m, 2H), 2.73-2.63 (m, 1H), 2.62-2.54 (m, 1H), 2.49-2.41 (m, 1H), 2.39 (s, 3H), 2.26-2.20 (m, 1H), 1.28 (t,  $J = 7.1$  Hz, 3H).  $^{13}\text{C}$  NMR (126 MHz,  $\text{CDCl}_3$ )  $\delta$  169.49, 144.15, 139.74, 137.98, 132.16, 130.95, 127.98, 127.96, 125.75, 124.51, 120.77, 68.30, 63.09, 41.56, 30.47, 21.39, 13.64. HRMS (ESI): calcd for  $\text{C}_{19}\text{H}_{21}\text{NO}_4\text{S}$   $[\text{M}+\text{Na}]^+$ : 382.1089, found 382.1081.

### 3. NMR spectrum and HPLC trace of compounds

#### (*R*)-2'-(Pyridin-2-yl)-2,3-dihydro-5'*H*-spiro[indene-1,4'-oxazole] (L1a)

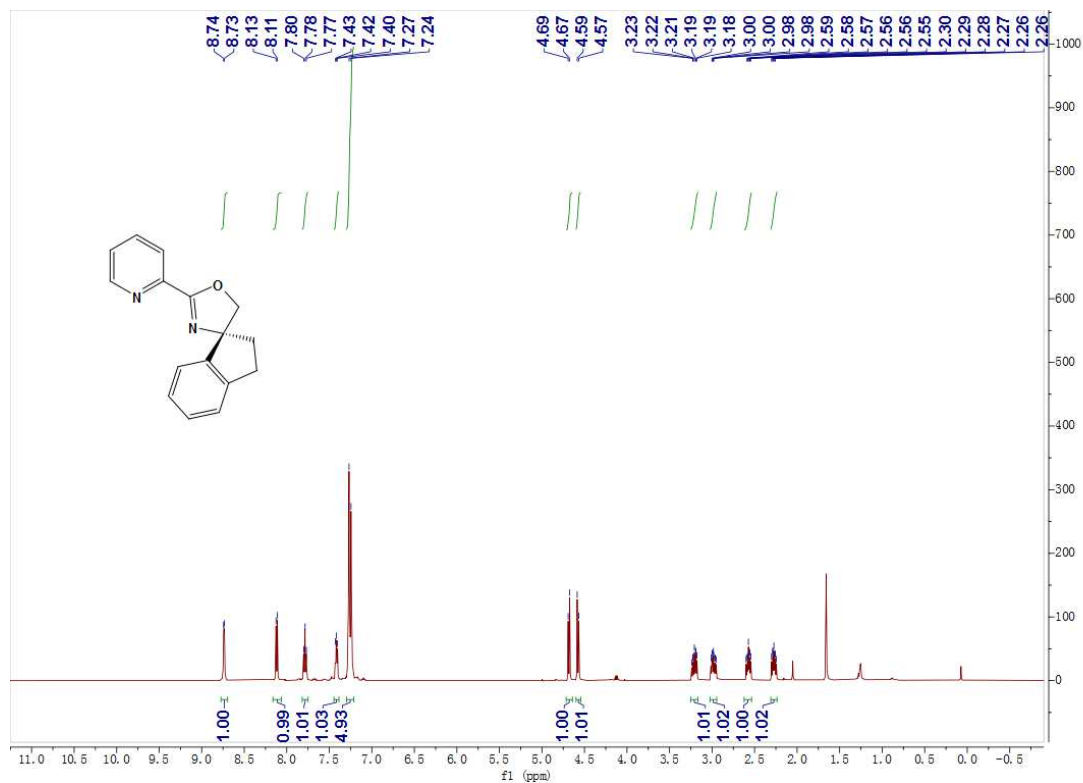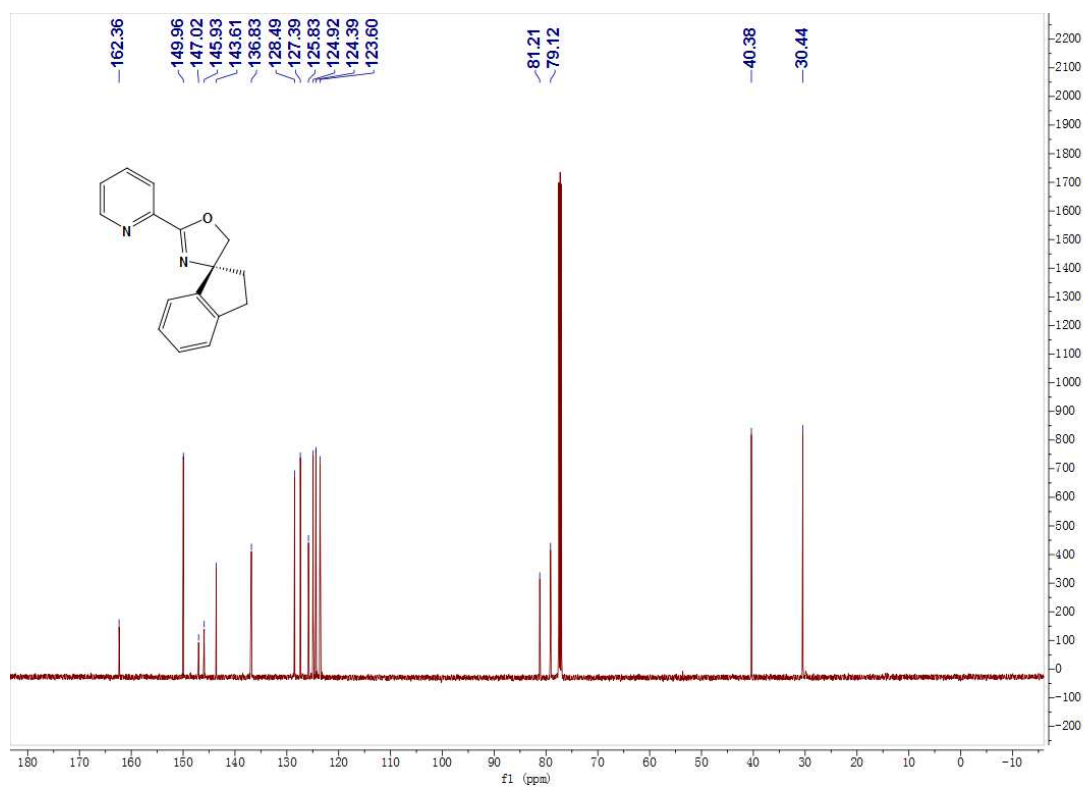

**(R)-2'-(5-(Trifluoromethyl)pyridin-2-yl)-2,3-dihydro-5'H-spiro[indene-1,4'-oxazole] (L1b)**

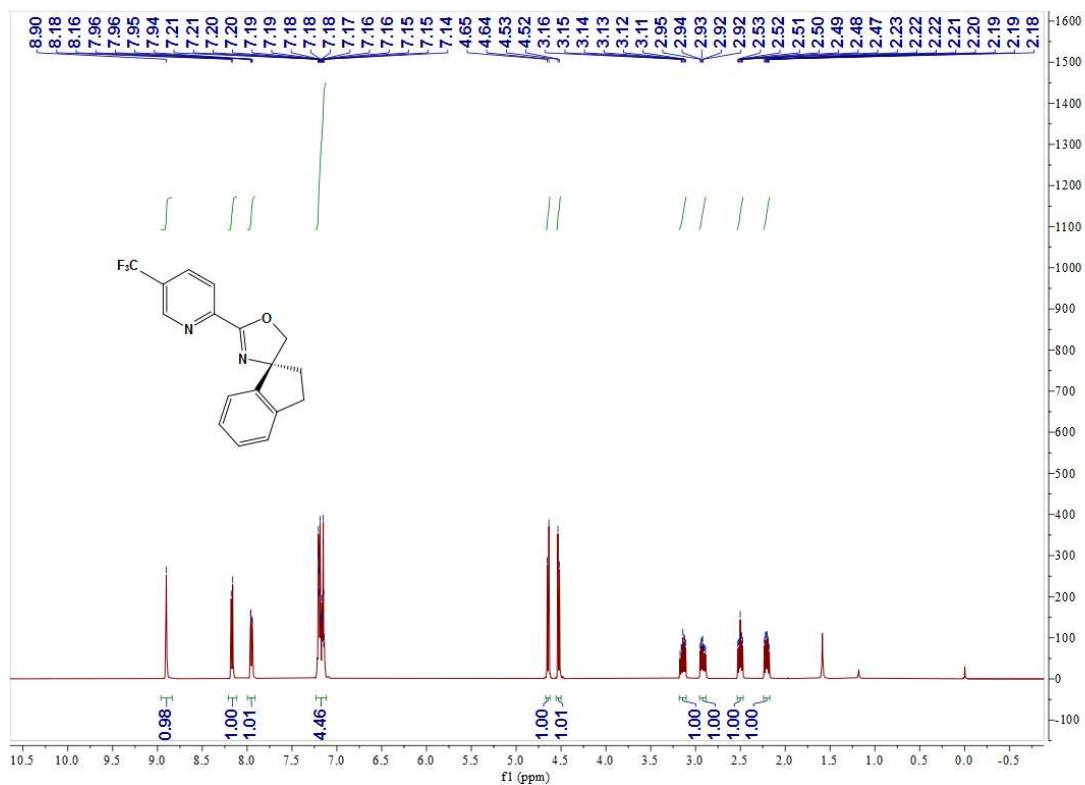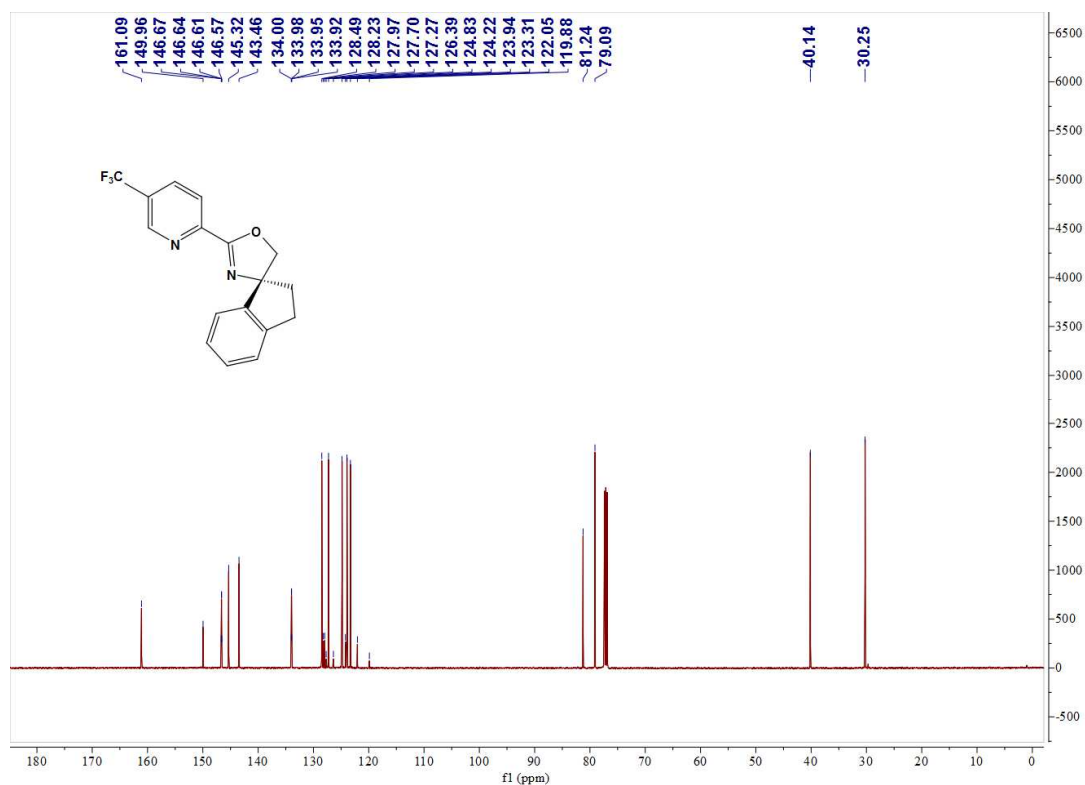

**(R)-2'-(5-Methoxypyridin-2-yl)-2,3-dihydro-5'H-spiro[indene-1,4'-oxazole] (L1c)**

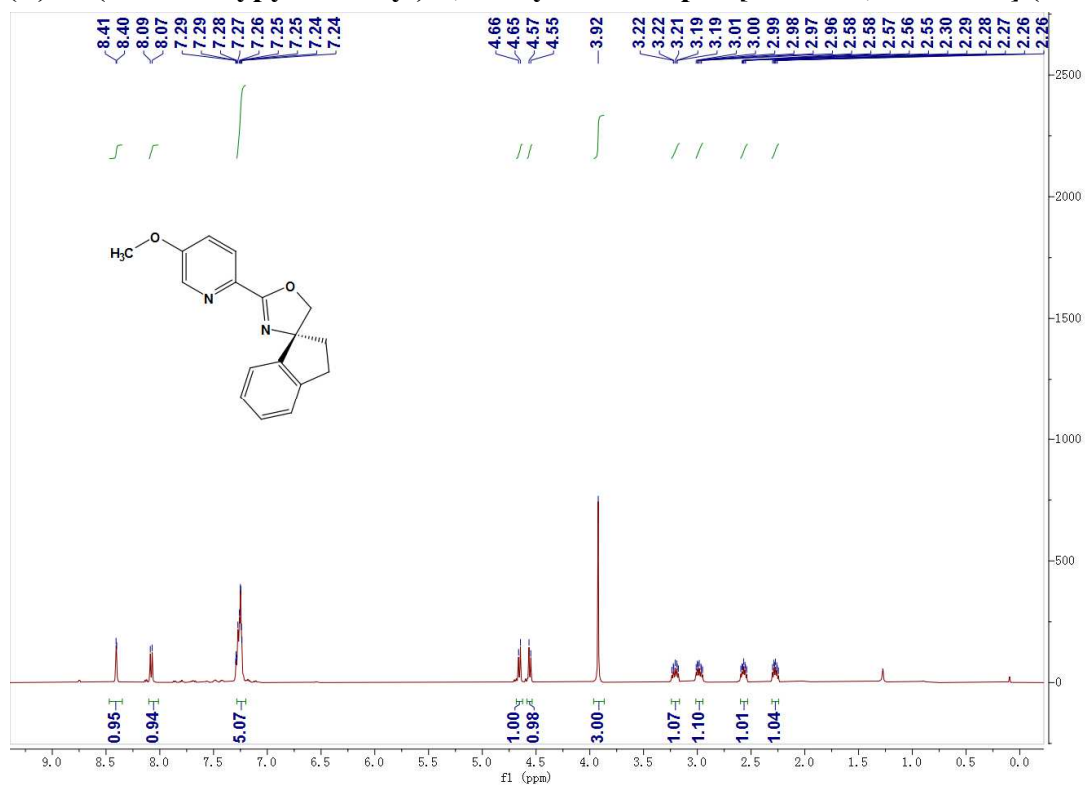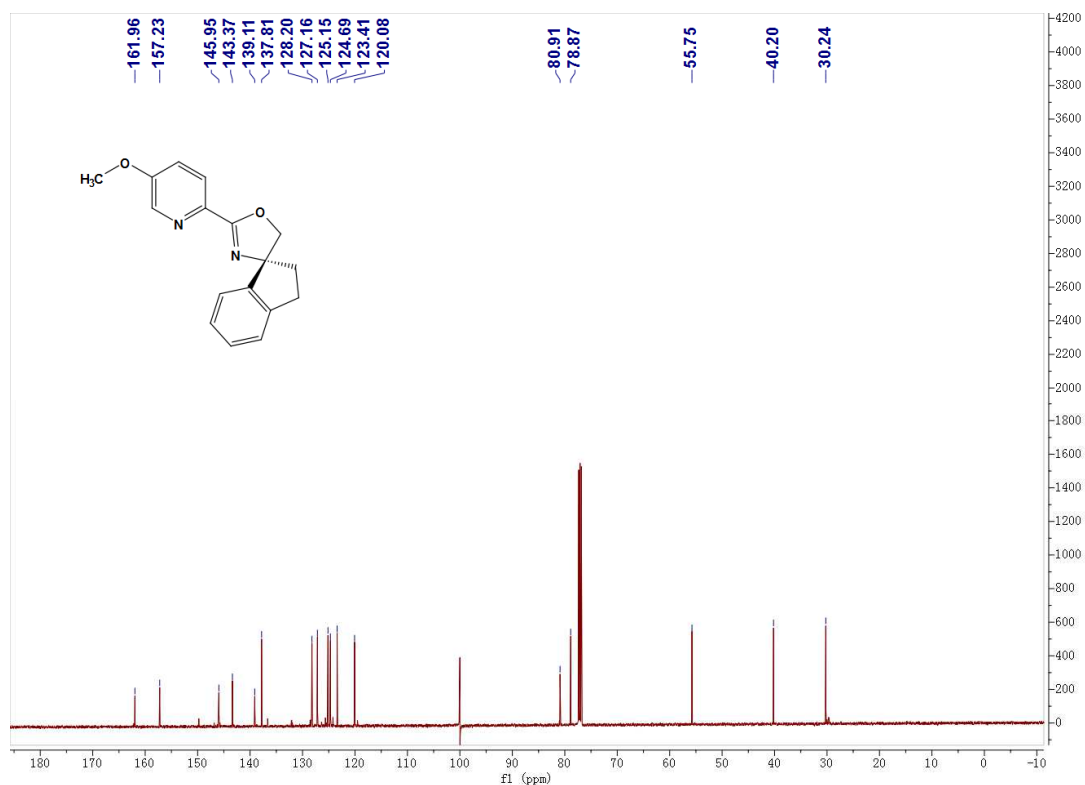

**(R)-2'-(Quinolin-2-yl)-2,3-dihydro-5'H-spiro[indene-1,4'-oxazole] (L2)**

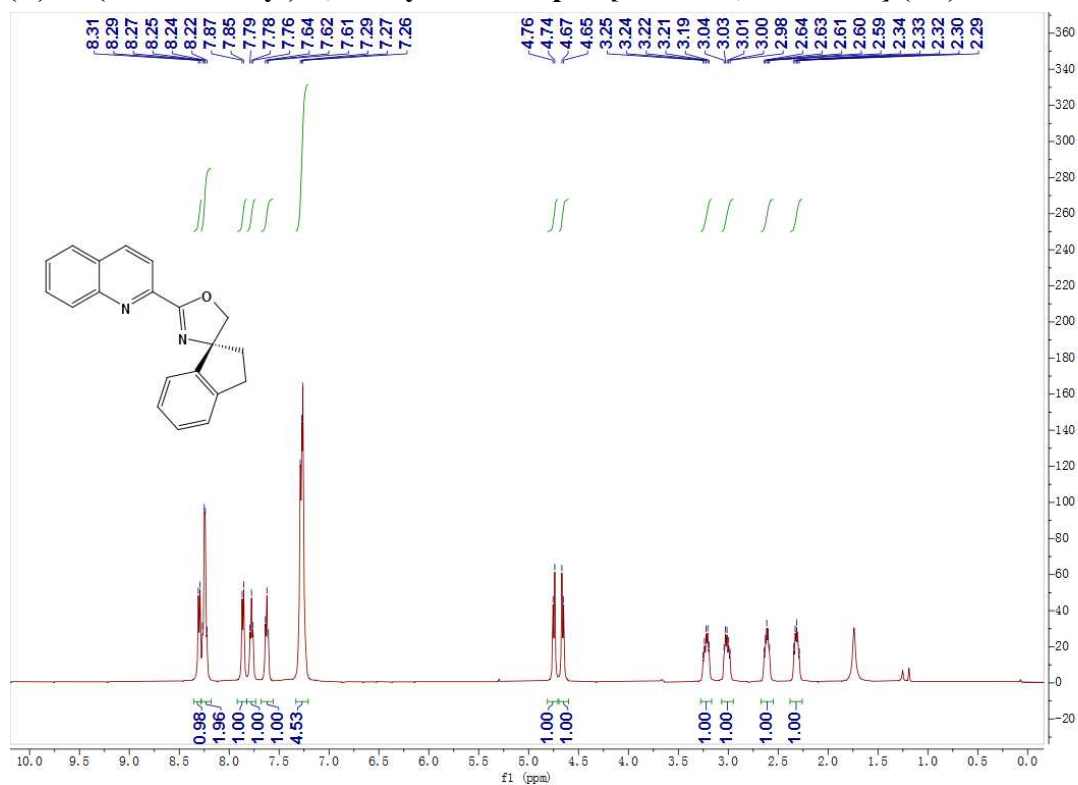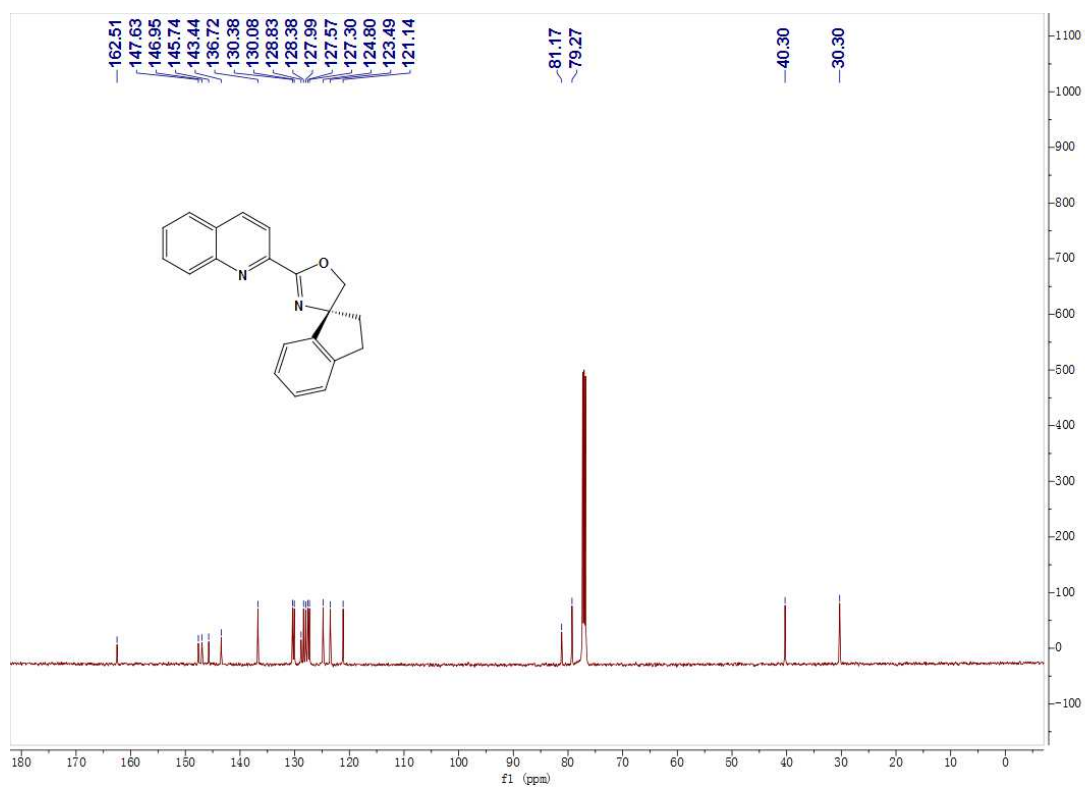

**Bis((*R*)-2,3-dihydro-5'*H*-spiro[indene-1,4'-oxazol]-2'-yl)propane (L3)**

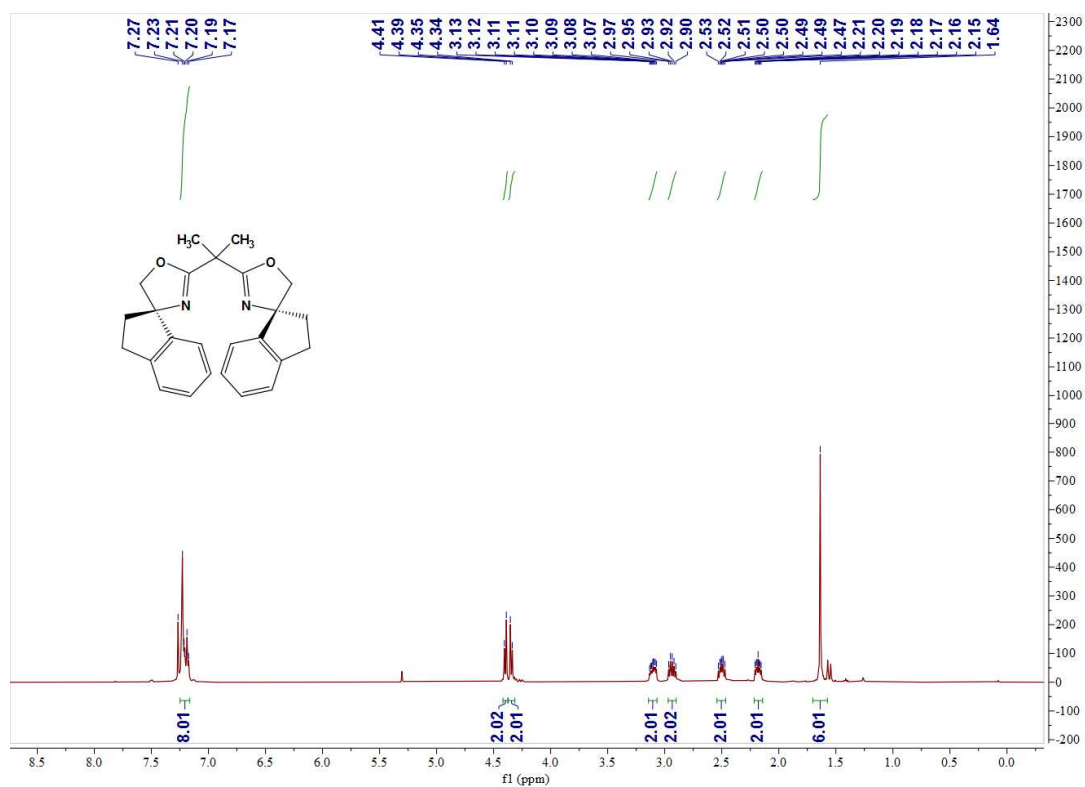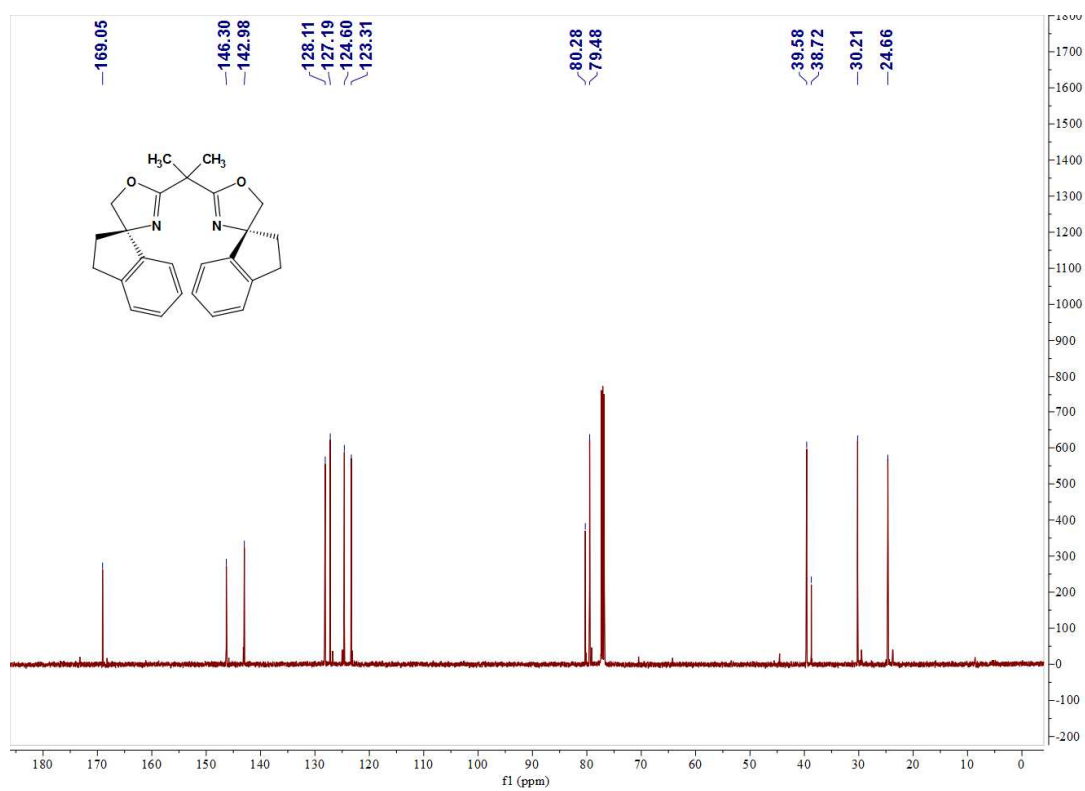

# 2,6-Bis((*R*)-2,3-dihydro-5'*H*-spiro[indene-1,4'-oxazol]-2'-yl)pyridine (L4)

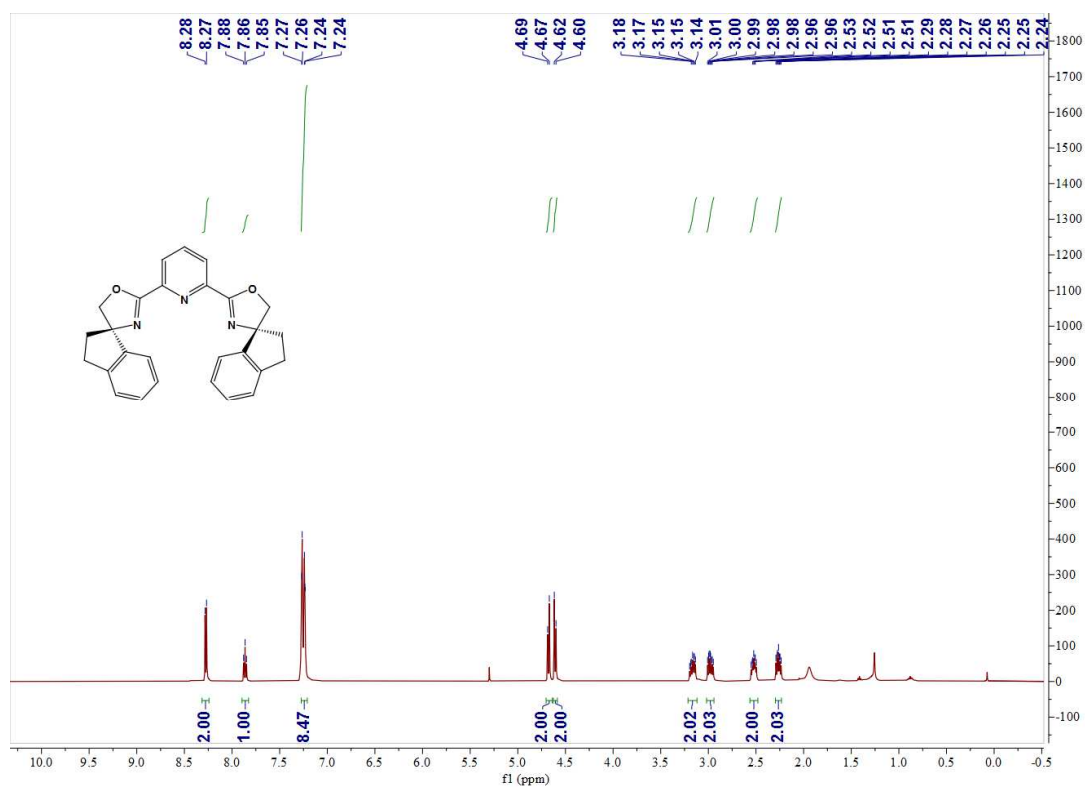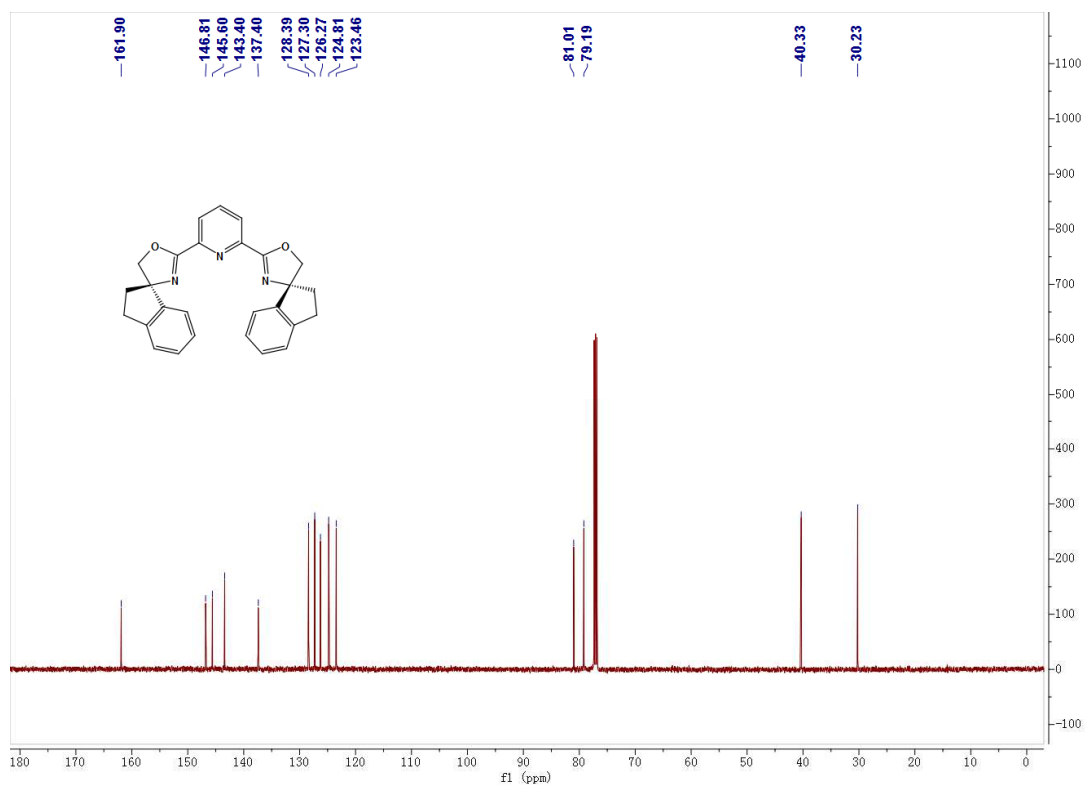

**(R)-ethyl 3-(2-oxo-2-phenylethyl)-2,3-dihydrobenzo[d]isothiazole 1,1-dioxide (1aa)**

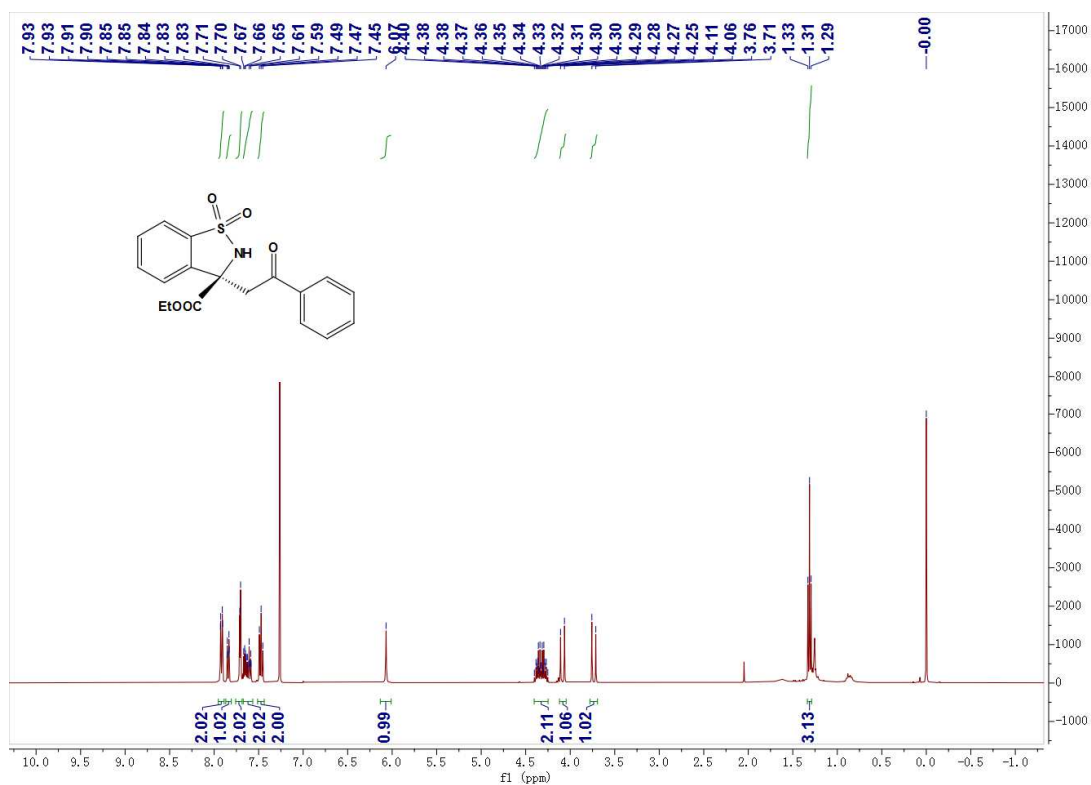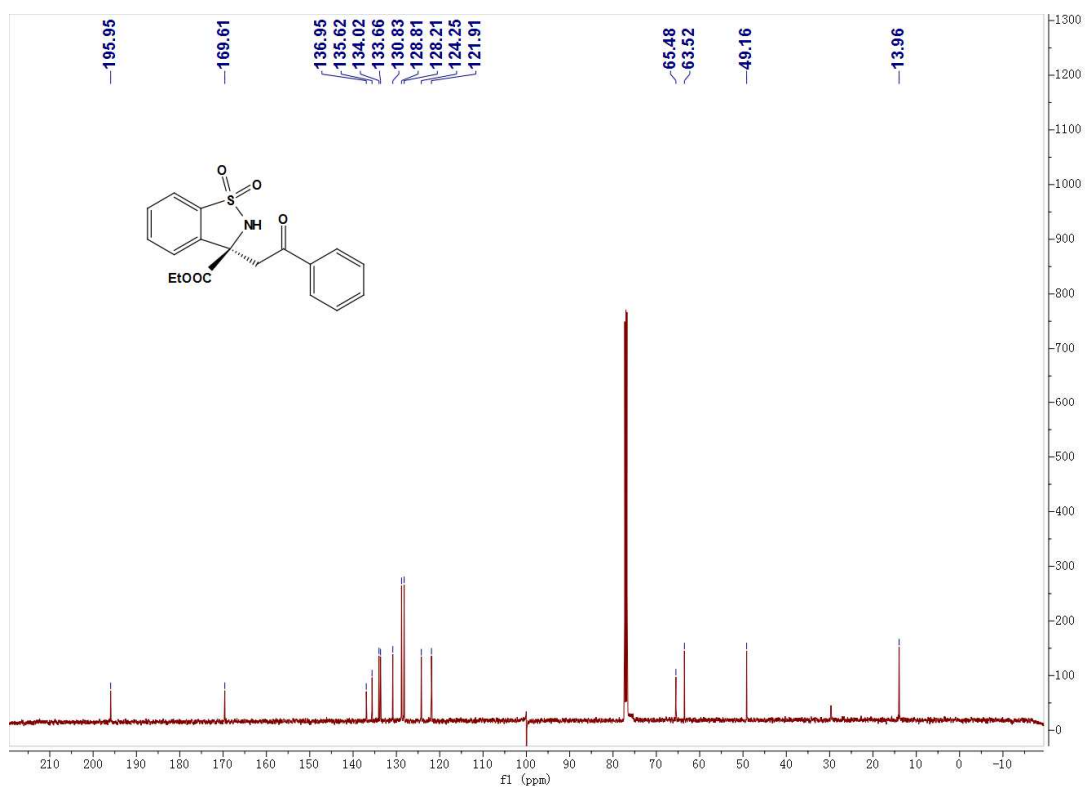



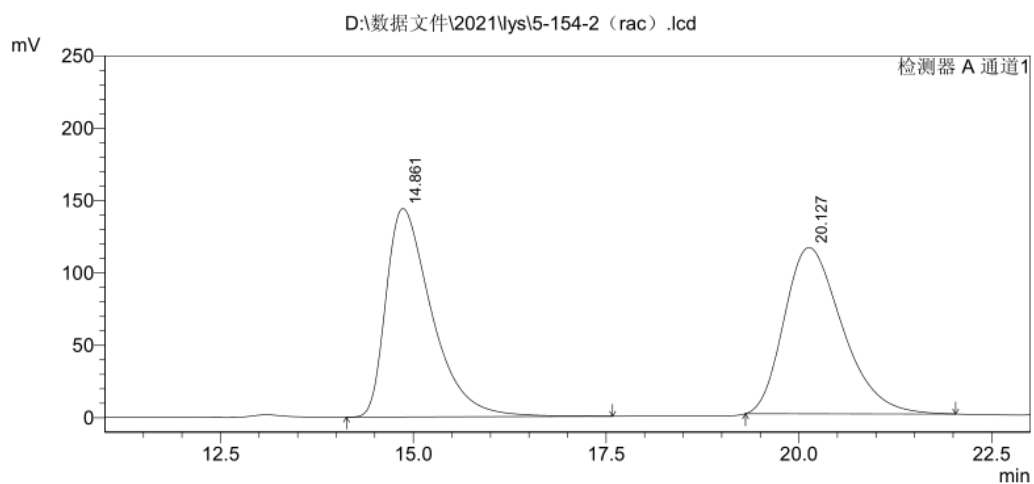

峰表

| 峰# | 保留时间   | 面积       | 高度     | 面积 %    | 高度 %    |
|----|--------|----------|--------|---------|---------|
| 1  | 14.861 | 5947858  | 144039 | 49.647  | 55.618  |
| 2  | 20.127 | 6032448  | 114940 | 50.353  | 44.382  |
| 总计 |        | 11980306 | 258980 | 100.000 | 100.000 |

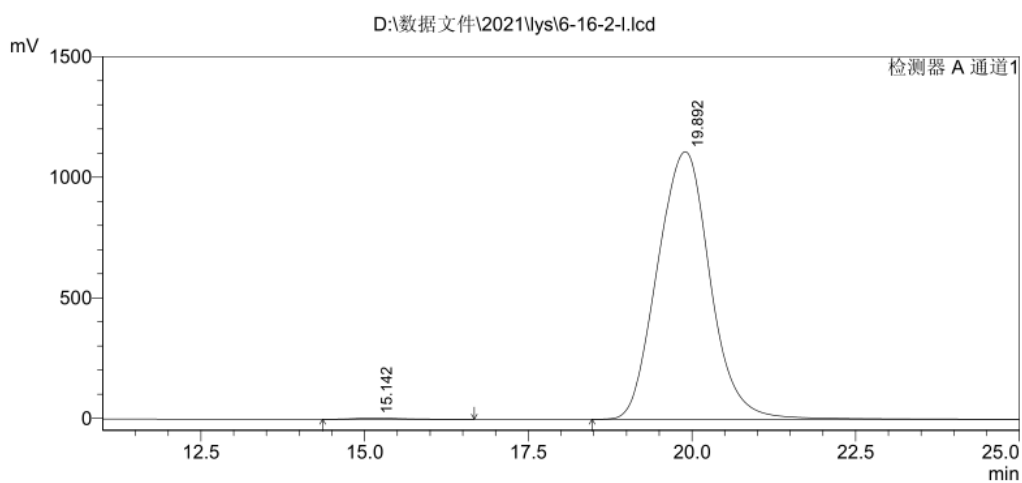

峰表

| 峰# | 保留时间   | 面积       | 高度      | 面积 %    | 高度 %    |
|----|--------|----------|---------|---------|---------|
| 1  | 15.142 | 202655   | 4826    | 0.325   | 0.433   |
| 2  | 19.892 | 62134110 | 1109354 | 99.675  | 99.567  |
| 总计 |        | 62336765 | 1114180 | 100.000 | 100.000 |

**(R)-ethyl 5-methyl-3-(2-oxo-2-phenylethyl)-2,3-dihydrobenzo[d]isothiazole**

**-3-carboxylate 1,1-dioxide (1ba)**

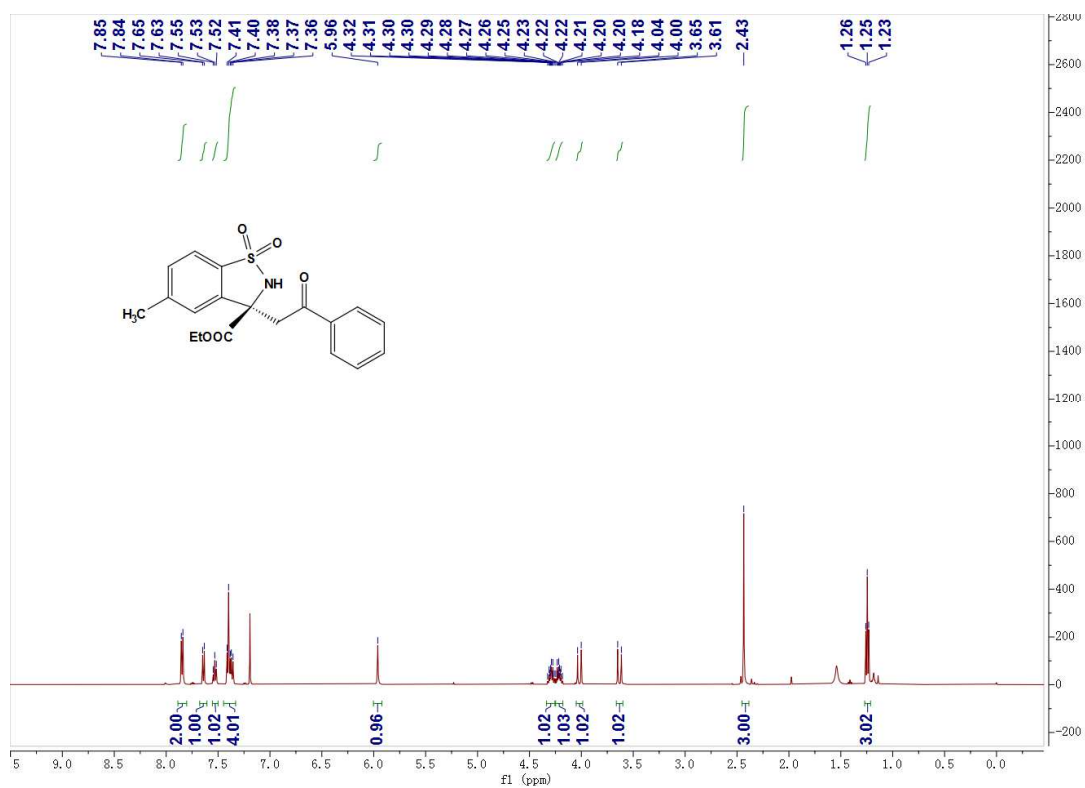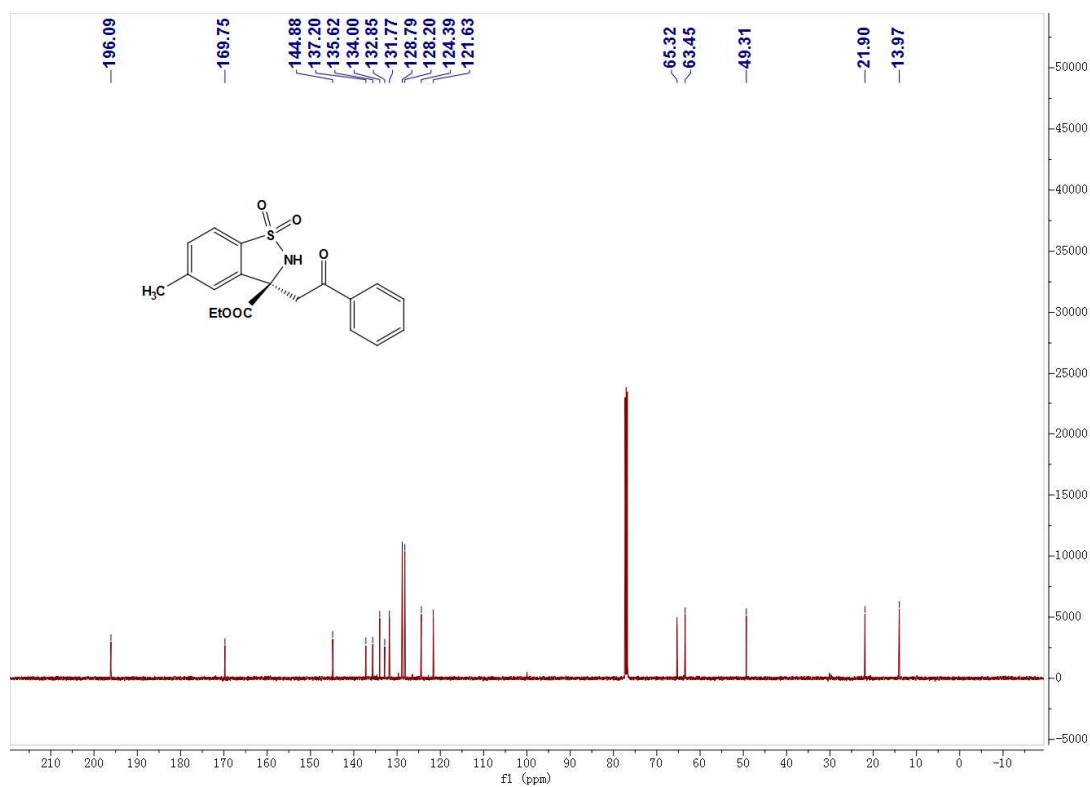

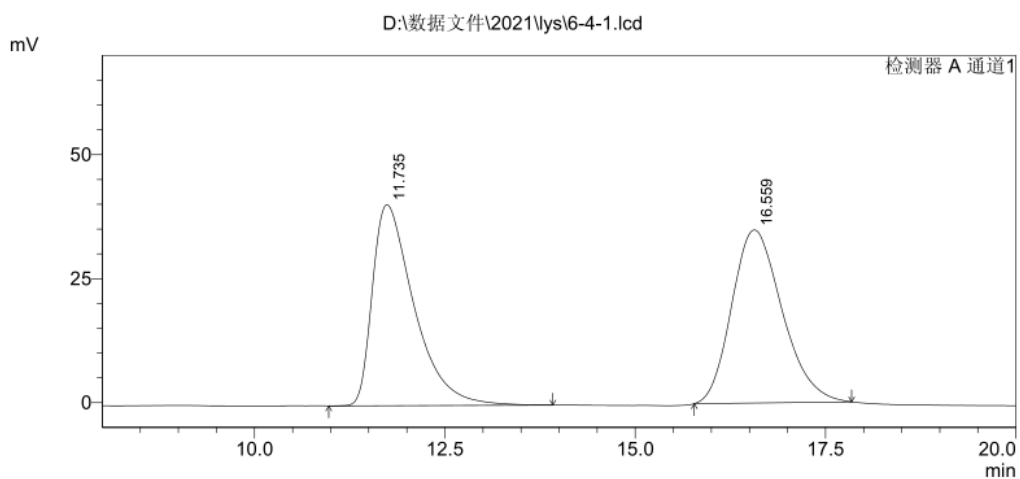

峰表

| 峰# | 保留时间   | 面积      | 高度    | 面积 %    | 高度 %    |
|----|--------|---------|-------|---------|---------|
| 1  | 11.735 | 1544441 | 40506 | 49.029  | 53.729  |
| 2  | 16.559 | 1605609 | 34884 | 50.971  | 46.271  |
| 总计 |        | 3150050 | 75390 | 100.000 | 100.000 |

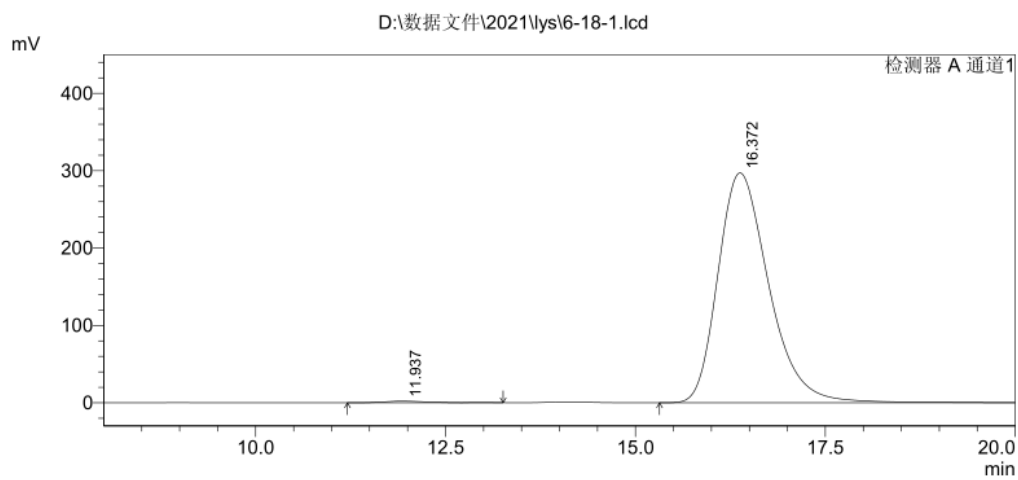

峰表

| 峰# | 保留时间   | 面积       | 高度     | 面积 %    | 高度 %    |
|----|--------|----------|--------|---------|---------|
| 1  | 11.937 | 81057    | 2095   | 0.582   | 0.700   |
| 2  | 16.372 | 13838300 | 297195 | 99.418  | 99.300  |
| 总计 |        | 13919358 | 299290 | 100.000 | 100.000 |

**(R)-ethyl 5-methoxy-3-(2-oxo-2-phenylethyl)-2,3-dihydrobenzo[d]isothiazole**

**-3-carboxylate 1,1-dioxide (1ca)**

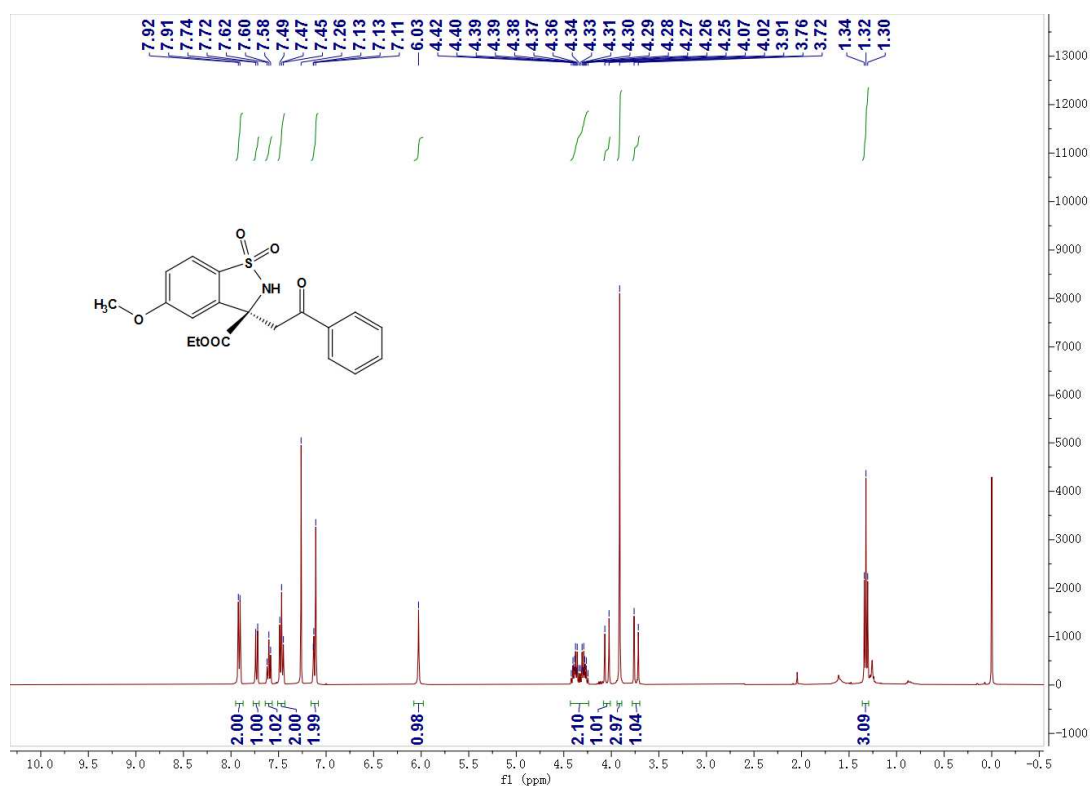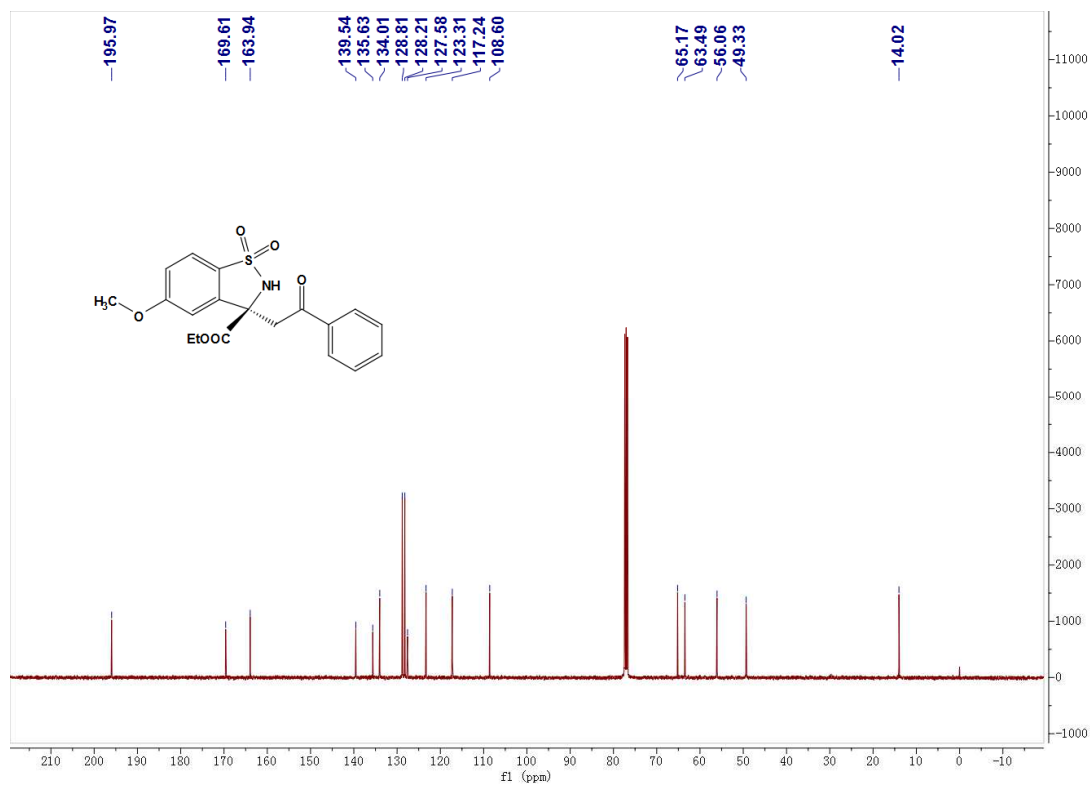

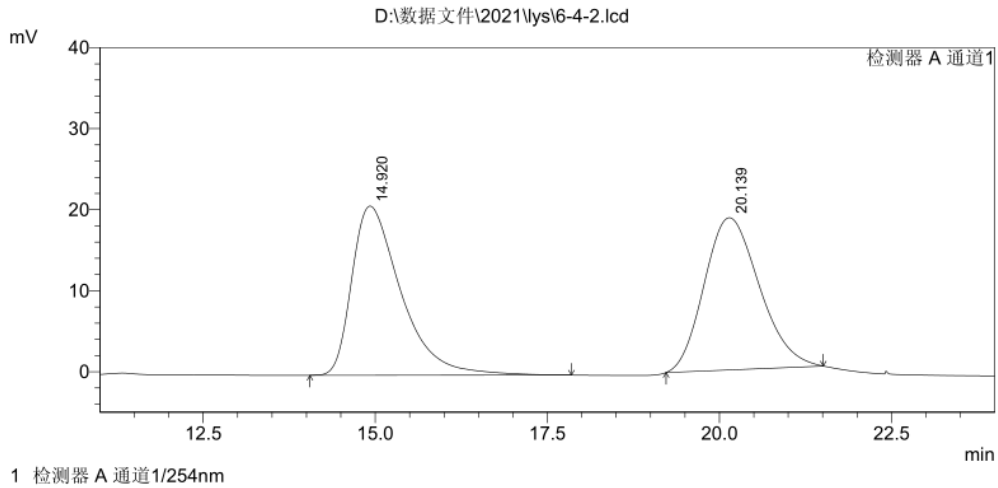

峰表

| 峰# | 保留时间   | 面积      | 高度    | 面积 %    | 高度 %    |
|----|--------|---------|-------|---------|---------|
| 1  | 14.920 | 1039324 | 20877 | 49.834  | 52.638  |
| 2  | 20.139 | 1046257 | 18785 | 50.166  | 47.362  |
| 总计 |        | 2085581 | 39662 | 100.000 | 100.000 |

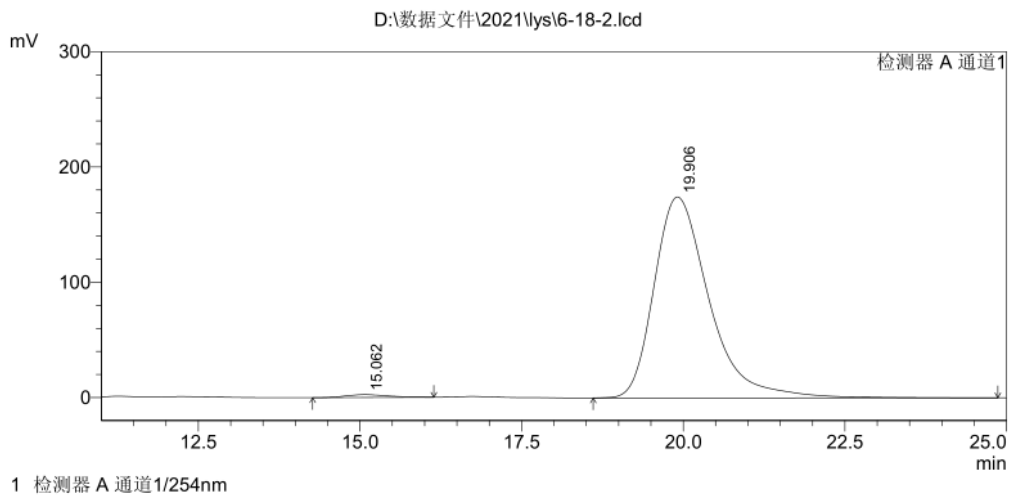

峰表

| 峰# | 保留时间   | 面积       | 高度     | 面积 %    | 高度 %    |
|----|--------|----------|--------|---------|---------|
| 1  | 15.062 | 113477   | 2476   | 1.090   | 1.401   |
| 2  | 19.906 | 10293229 | 174255 | 98.910  | 98.599  |
| 总计 |        | 10406706 | 176731 | 100.000 | 100.000 |

**(R)-ethyl 5-(tert-butyl)-3-(2-oxo-2-phenylethyl)-2,3-dihydrobenzo[d]isothiazole**

**-3-carboxylate 1,1-dioxide (1da)**

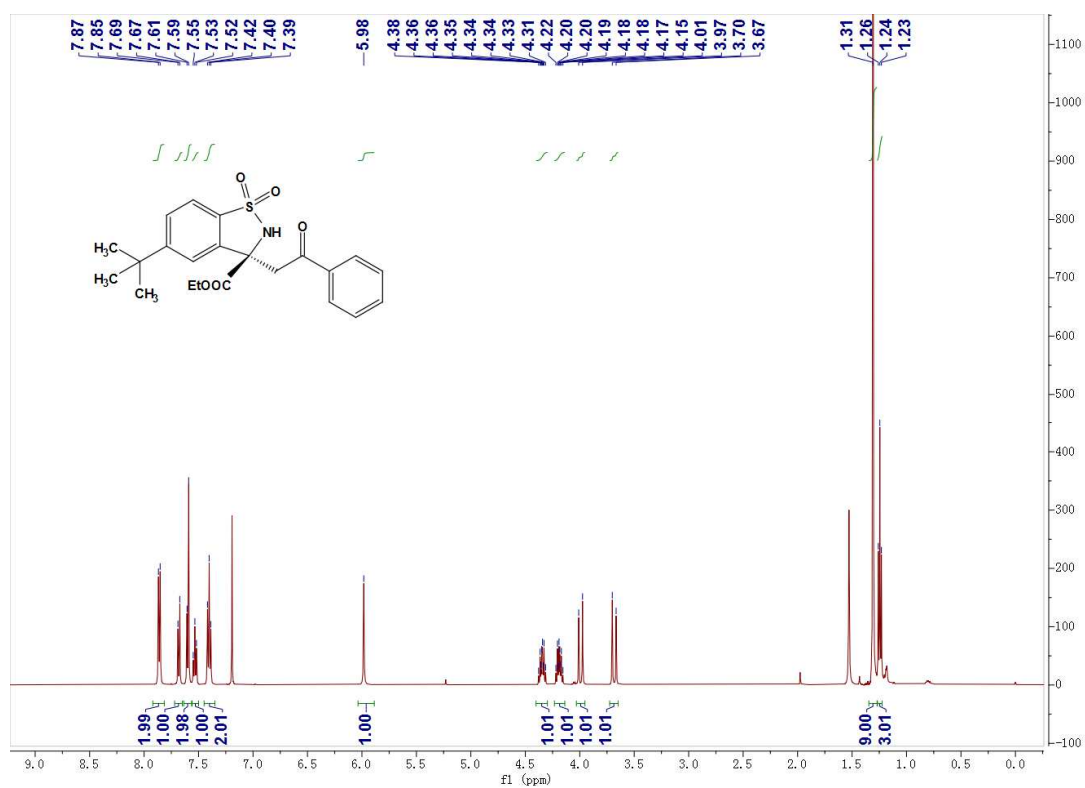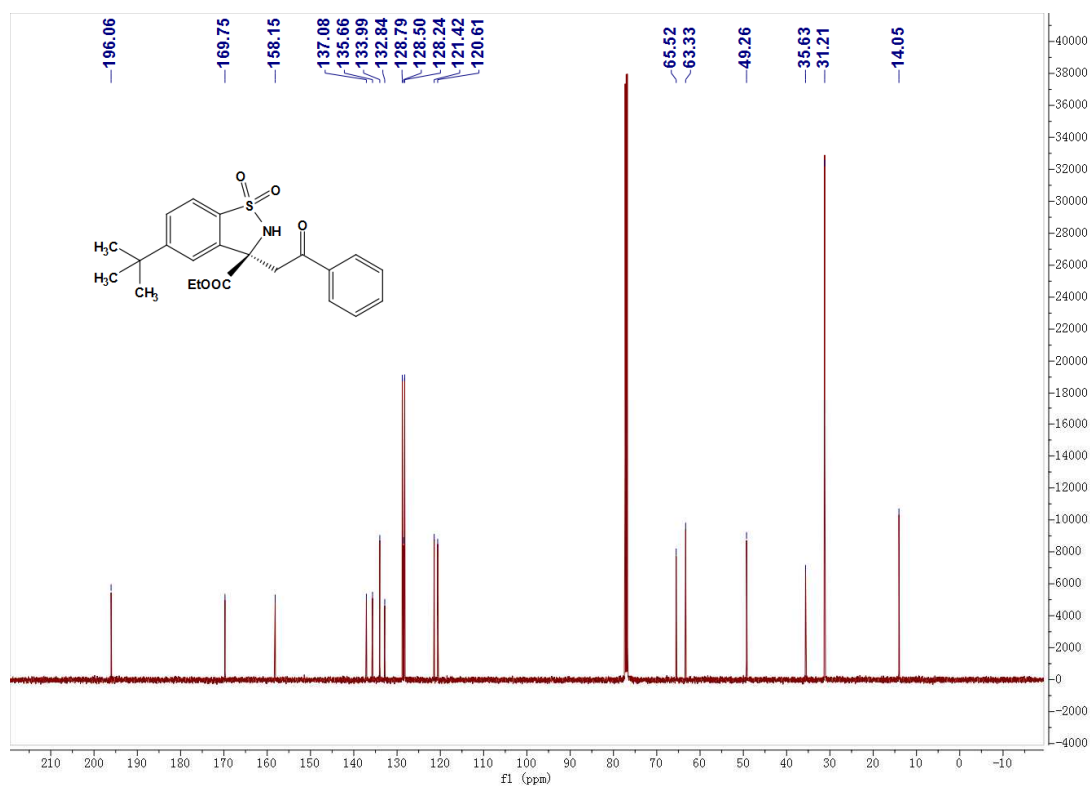

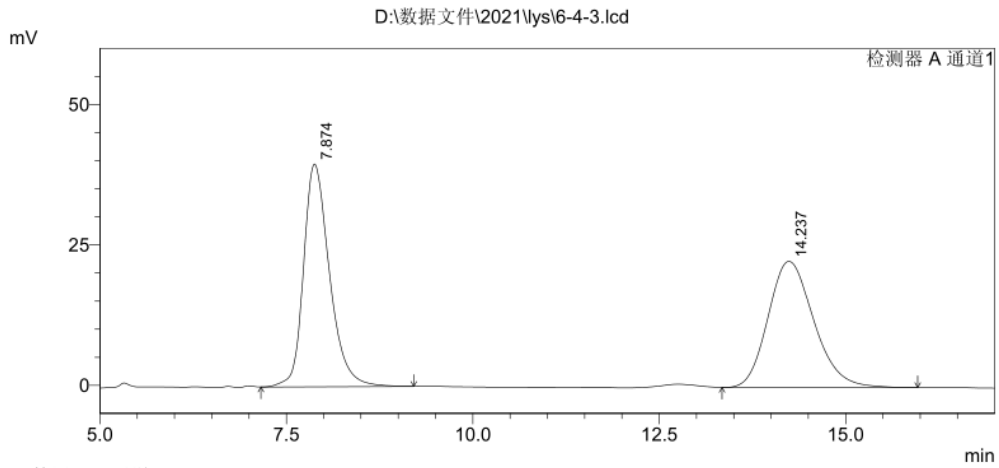

峰表

| 峰# | 保留时间   | 面积      | 高度    | 面积 %    | 高度 %    |
|----|--------|---------|-------|---------|---------|
| 1  | 7.874  | 962873  | 39663 | 50.063  | 63.831  |
| 2  | 14.237 | 960460  | 22474 | 49.937  | 36.169  |
| 总计 |        | 1923333 | 62137 | 100.000 | 100.000 |

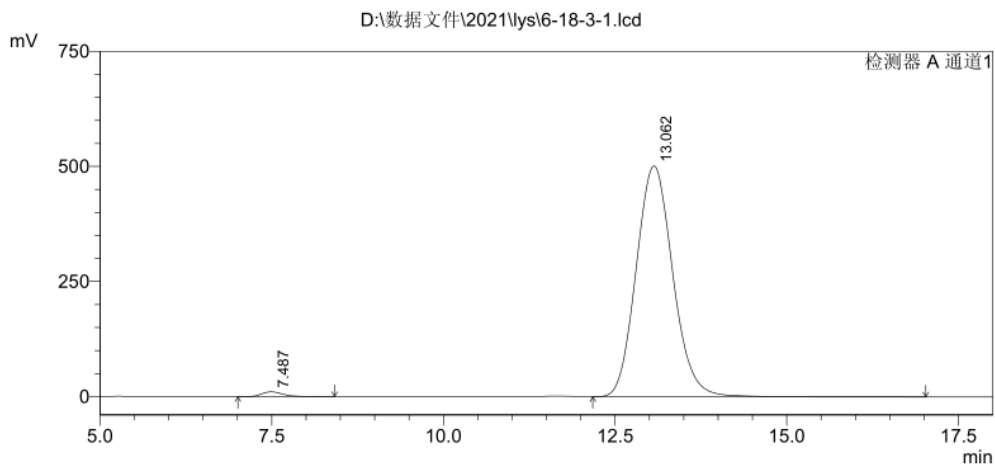

峰表

| 峰# | 保留时间   | 面积       | 高度     | 面积 %    | 高度 %    |
|----|--------|----------|--------|---------|---------|
| 1  | 7.487  | 222412   | 10310  | 1.179   | 2.014   |
| 2  | 13.062 | 18641668 | 501745 | 98.821  | 97.986  |
| 总计 |        | 18864080 | 512055 | 100.000 | 100.000 |

**(R)-ethyl 5-chloro-3-(2-oxo-2-phenylethyl)-2,3-dihydrobenzo[d]isothiazole**

**-3-carboxylate 1,1-dioxide (1ea)**

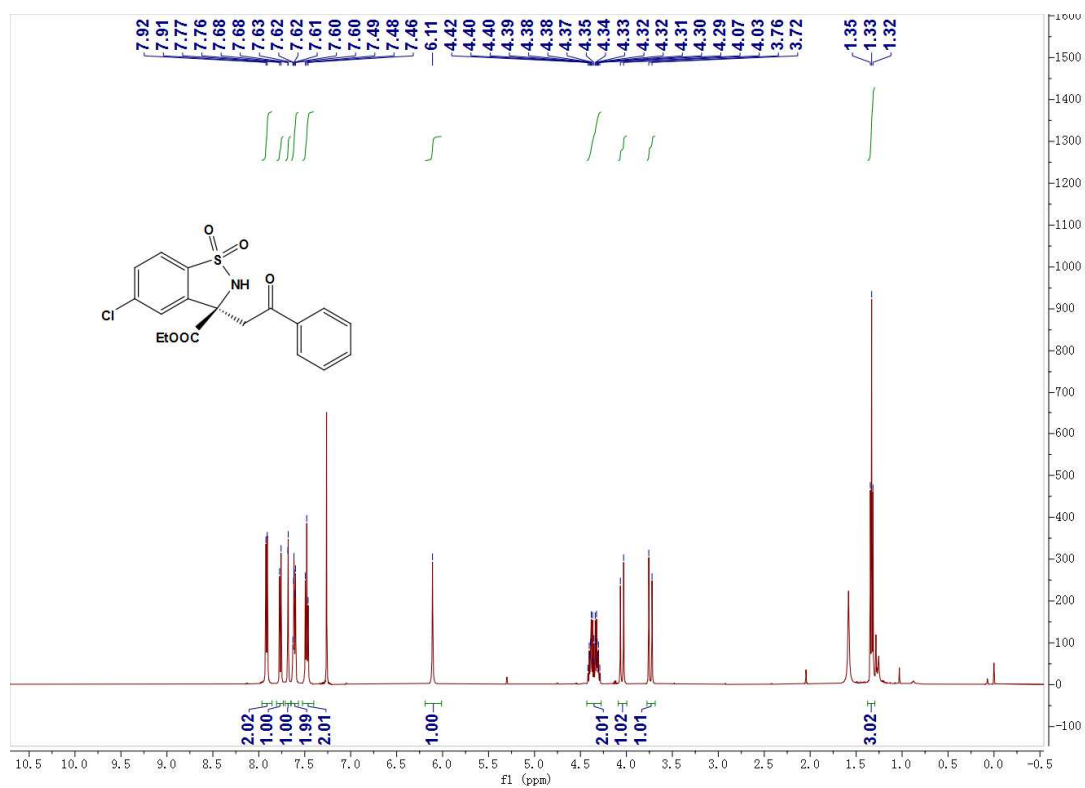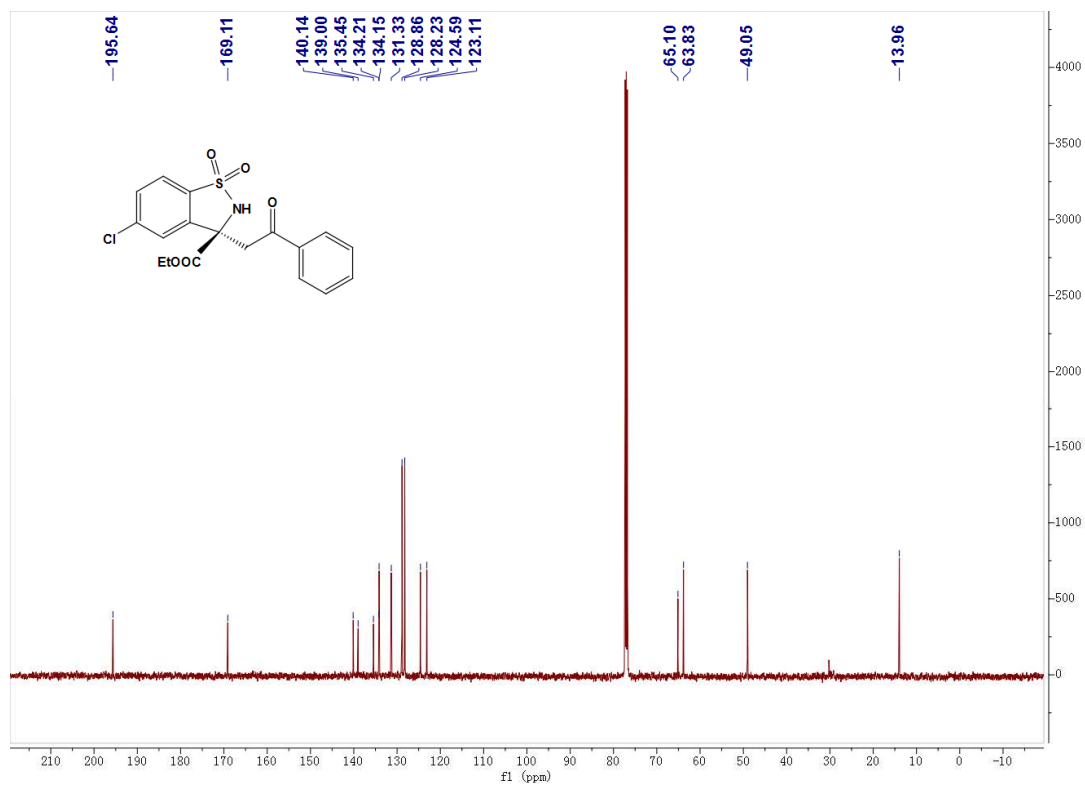



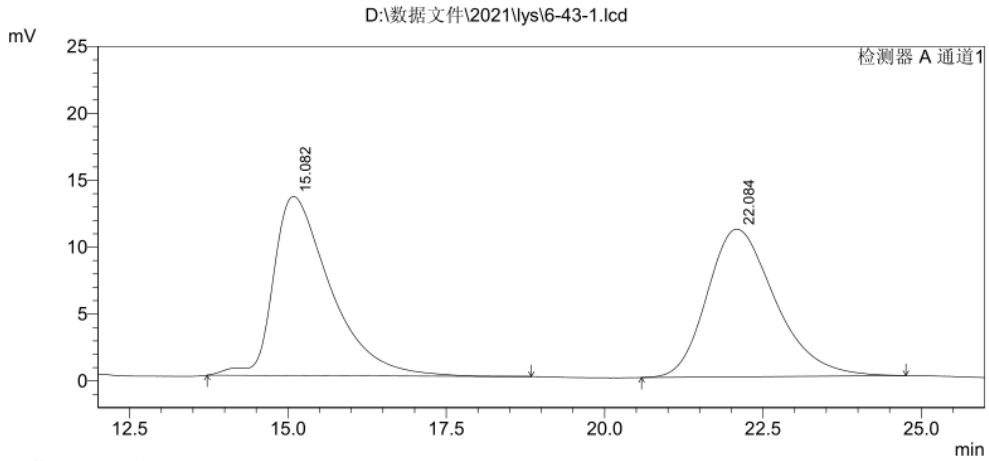

1 检测器 A 通道1/254nm

峰表

| 检测器 A Ch1 254nm |        |         |       |         |         |
|-----------------|--------|---------|-------|---------|---------|
| 峰#              | 保留时间   | 面积      | 高度    | 面积 %    | 高度 %    |
| 1               | 15.082 | 842422  | 13386 | 50.445  | 54.790  |
| 2               | 22.084 | 827553  | 11045 | 49.555  | 45.210  |
| 总计              |        | 1669975 | 24431 | 100.000 | 100.000 |

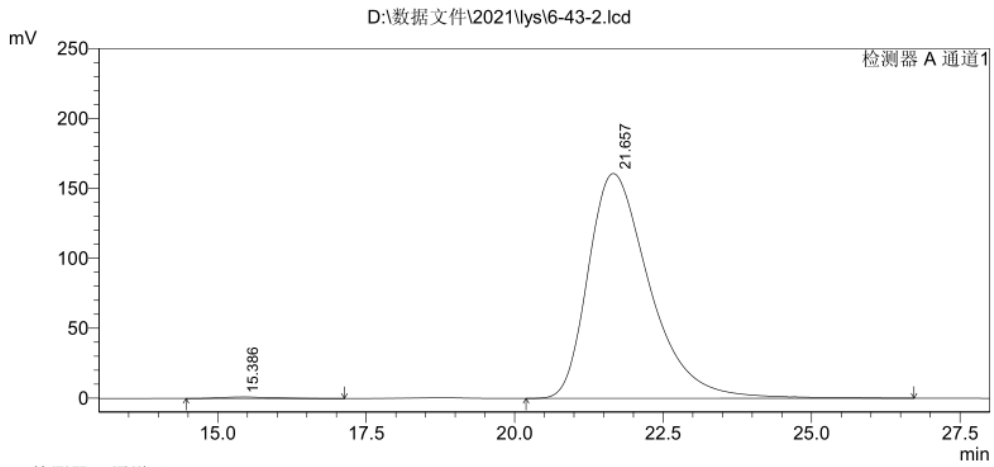

1 检测器 A 通道1/254nm

峰表

| 检测器 A Ch1 254nm |        |          |        |         |         |
|-----------------|--------|----------|--------|---------|---------|
| 峰#              | 保留时间   | 面积       | 高度     | 面积 %    | 高度 %    |
| 1               | 15.386 | 60961    | 1034   | 0.523   | 0.639   |
| 2               | 21.657 | 11586788 | 160829 | 99.477  | 99.361  |
| 总计              |        | 11647748 | 161863 | 100.000 | 100.000 |

**(R)-ethyl 3-(2-oxo-2-phenylethyl)-5-(trifluoromethyl)-2,3-dihydrobenzo[d]**

**isothiazole-3-carboxylate 1,1-dioxide (1fa)**

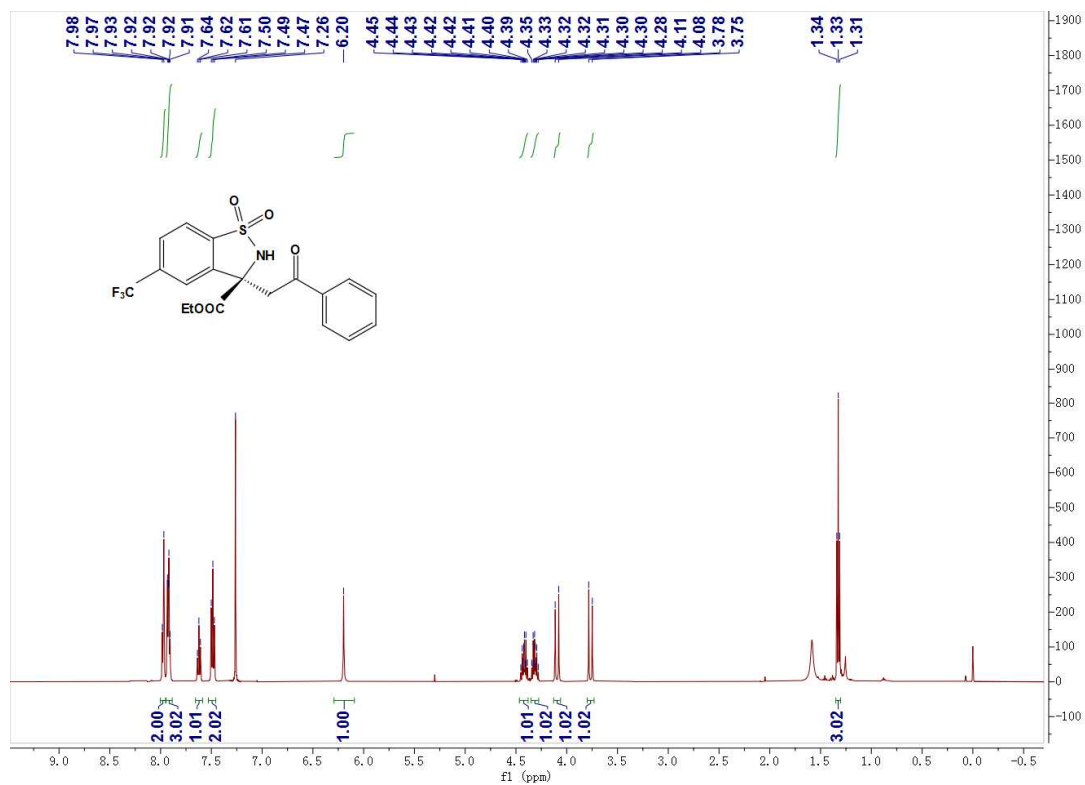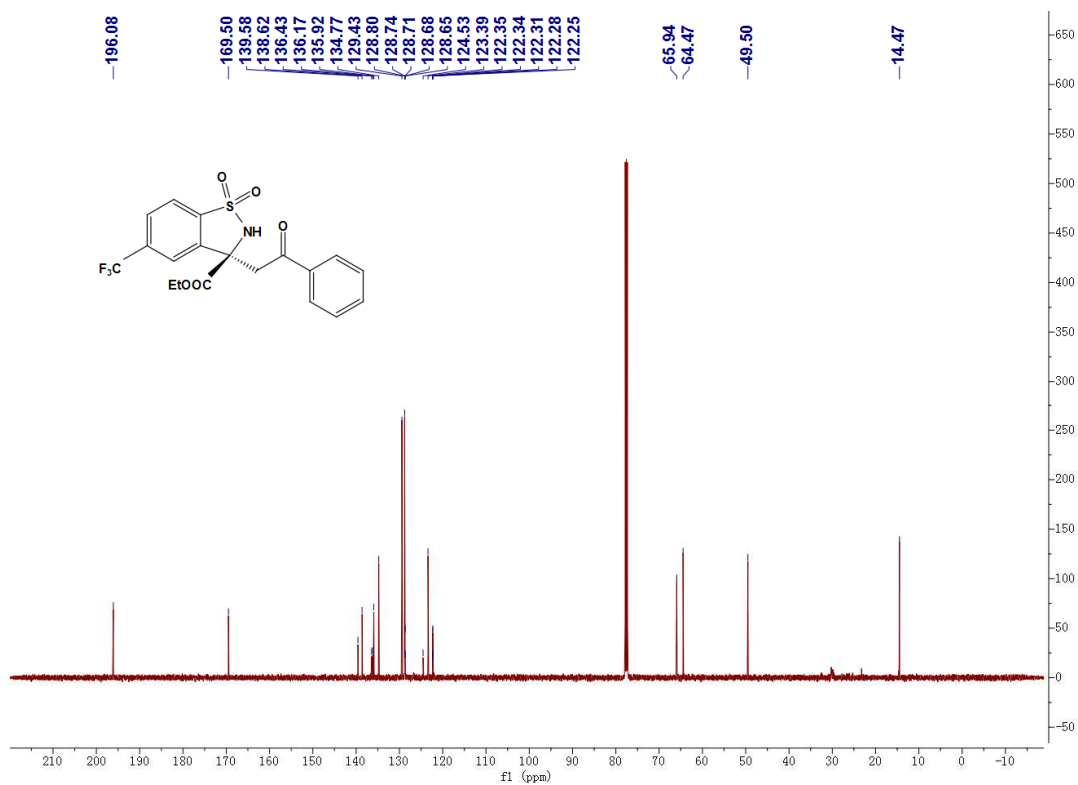

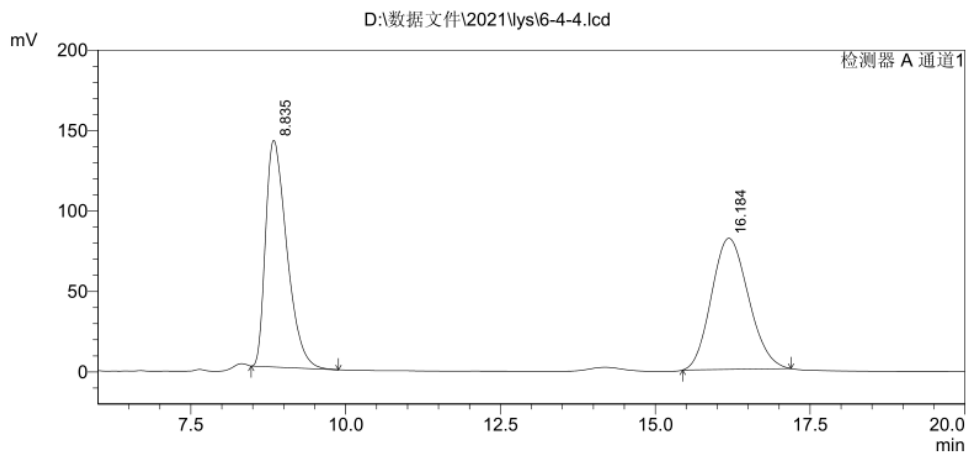

峰表

| 峰# | 保留时间   | 面积      | 高度     | 面积 %    | 高度 %    |
|----|--------|---------|--------|---------|---------|
| 1  | 8.835  | 3371592 | 140953 | 49.852  | 63.347  |
| 2  | 16.184 | 3391599 | 81556  | 50.148  | 36.653  |
| 总计 |        | 6763191 | 222510 | 100.000 | 100.000 |

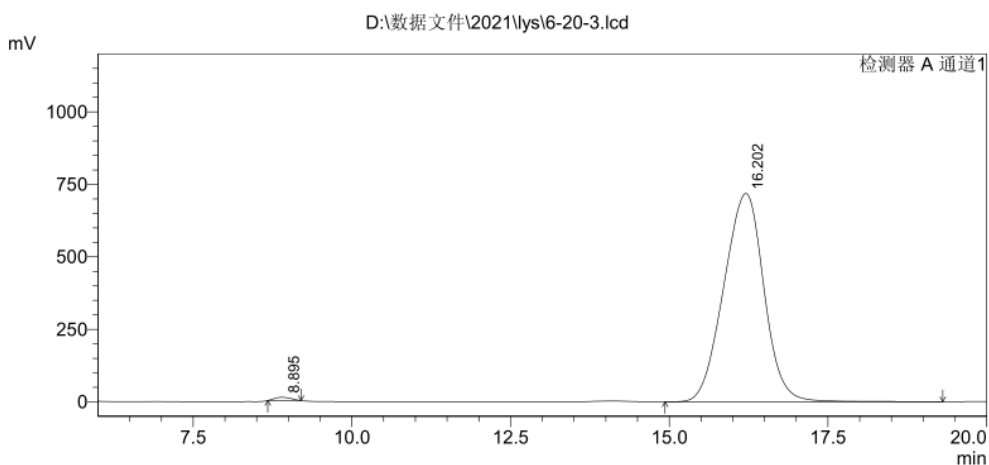

峰表

| 峰# | 保留时间   | 面积       | 高度     | 面积 %    | 高度 %    |
|----|--------|----------|--------|---------|---------|
| 1  | 8.895  | 205011   | 11600  | 0.644   | 1.589   |
| 2  | 16.202 | 31607235 | 718418 | 99.356  | 98.411  |
| 总计 |        | 31812246 | 730017 | 100.000 | 100.000 |

**(R)-ethyl 3-(2-oxo-2-(4-tolyl)ethyl)-2,3-dihydrobenzo[d] isothiazole**

**-3-carboxylate 1,1-dioxide (1a)**

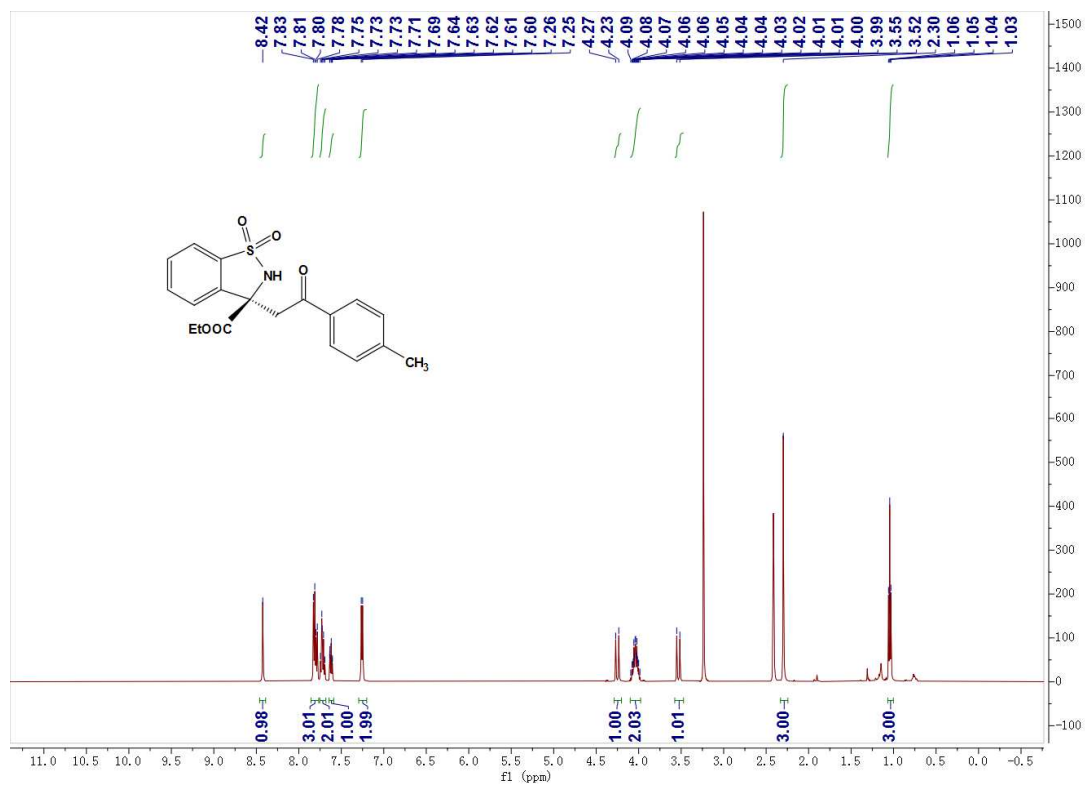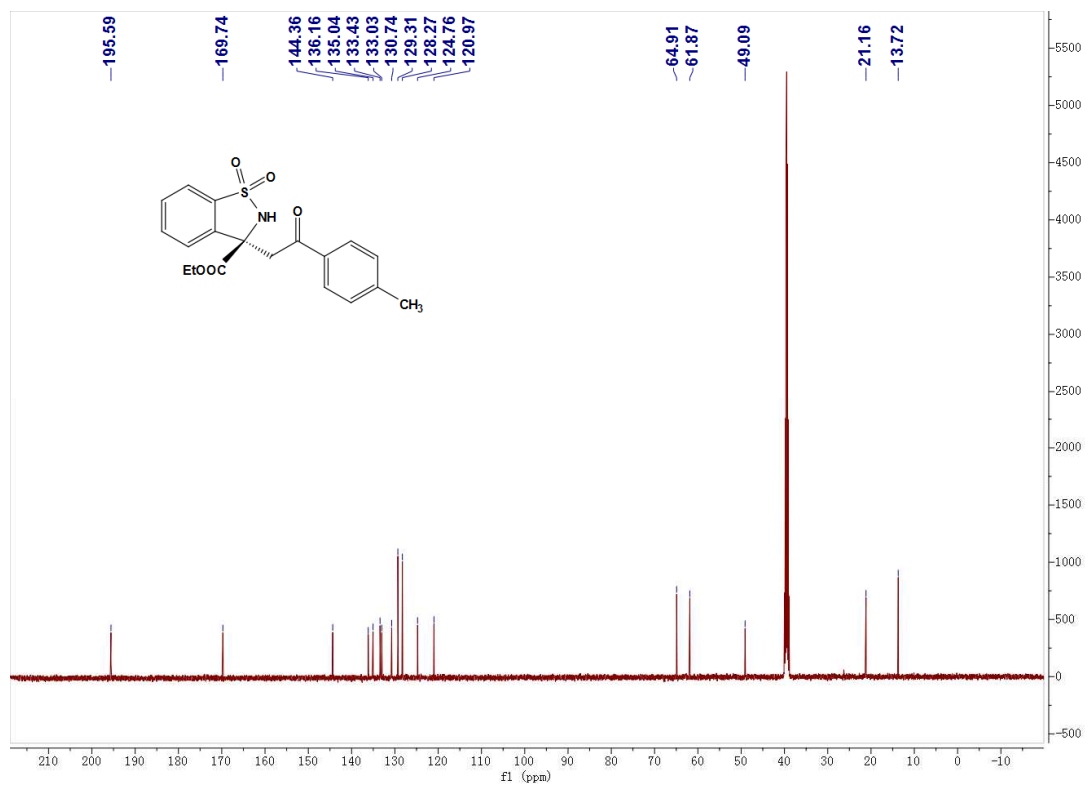

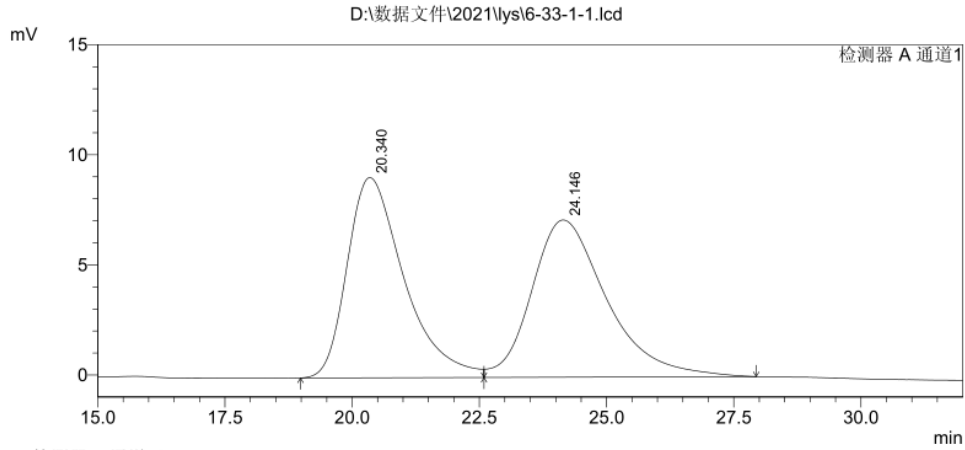

峰表

| 峰# | 保留时间   | 面积      | 高度    | 面积 %    | 高度 %    |
|----|--------|---------|-------|---------|---------|
| 1  | 20.340 | 706770  | 9088  | 49.118  | 56.006  |
| 2  | 24.146 | 732148  | 7139  | 50.882  | 43.994  |
| 总计 |        | 1438918 | 16227 | 100.000 | 100.000 |

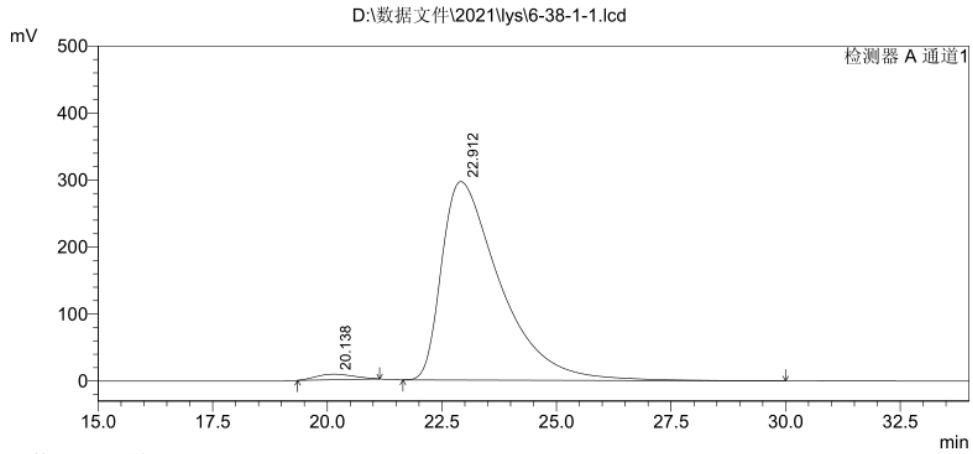

峰表

| 峰# | 保留时间   | 面积       | 高度     | 面积 %    | 高度 %    |
|----|--------|----------|--------|---------|---------|
| 1  | 20.138 | 475846   | 8290   | 1.773   | 2.721   |
| 2  | 22.912 | 26366274 | 296338 | 98.227  | 97.279  |
| 总计 |        | 26842120 | 304629 | 100.000 | 100.000 |

**(R)-ethyl 3-(2-(4-methoxyphenyl)-2-oxoethyl)-2,3-dihydrobenzo[d]isothiazole**

**-3-carboxylate 1,1-dioxide (1ac)**

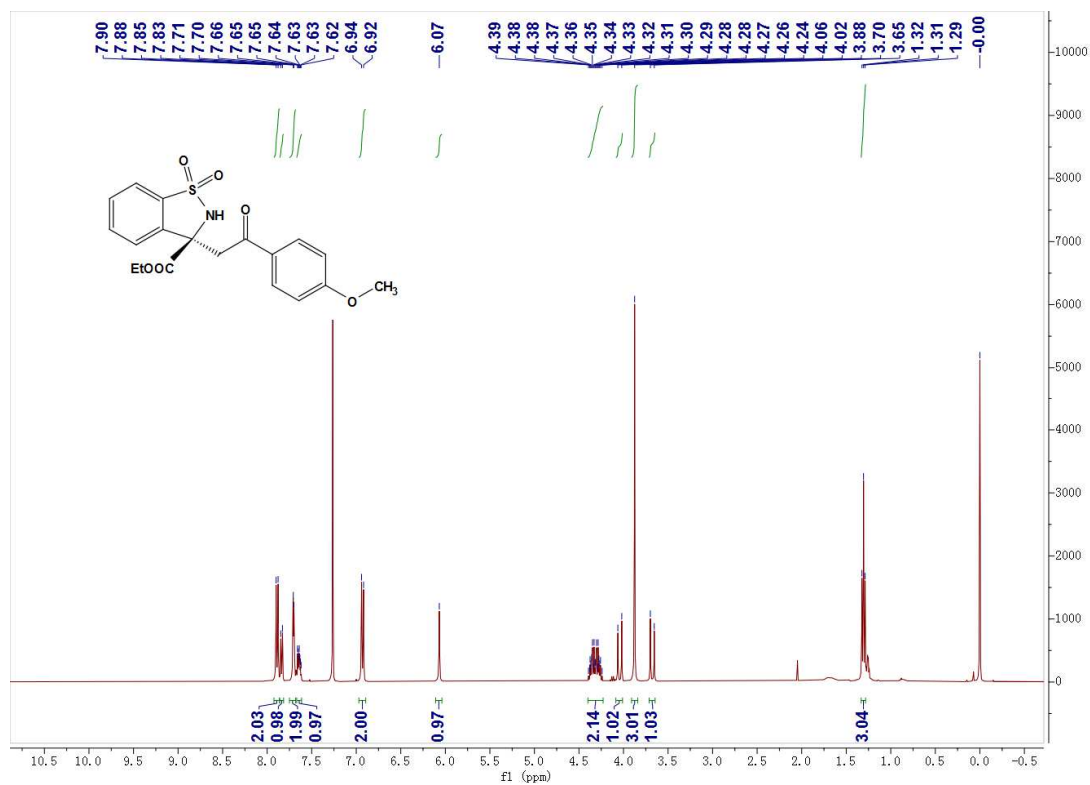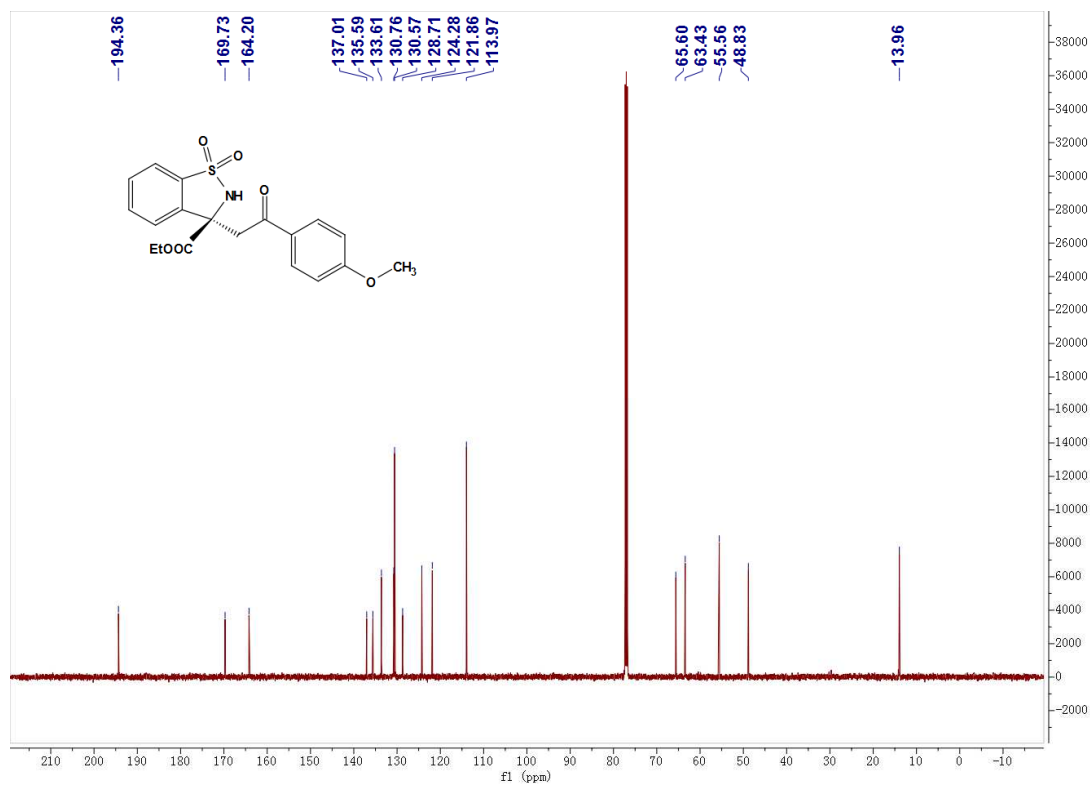

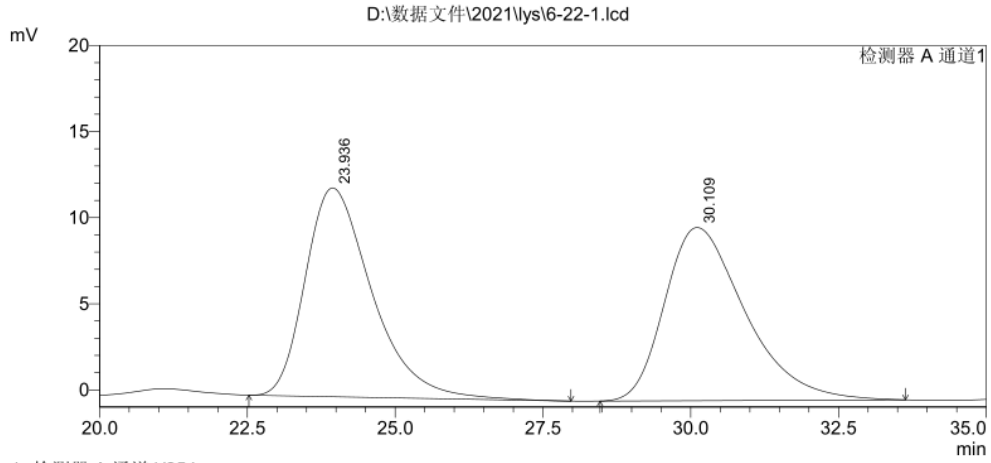

峰表

| 峰# | 保留时间   | 面积      | 高度    | 面积 %    | 高度 %    |
|----|--------|---------|-------|---------|---------|
| 1  | 23.936 | 953153  | 12127 | 49.979  | 54.663  |
| 2  | 30.109 | 953941  | 10058 | 50.021  | 45.337  |
| 总计 |        | 1907094 | 22185 | 100.000 | 100.000 |

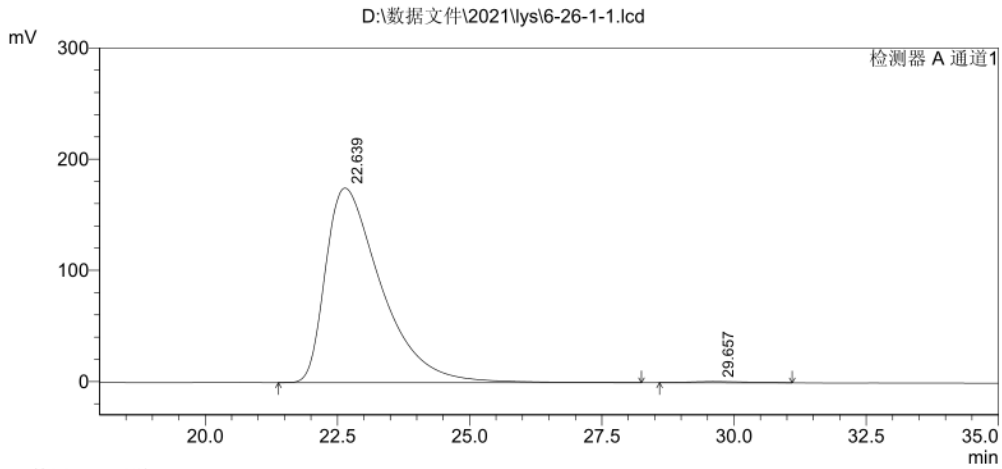

峰表

| 峰# | 保留时间   | 面积       | 高度     | 面积 %    | 高度 %    |
|----|--------|----------|--------|---------|---------|
| 1  | 22.639 | 12886642 | 175070 | 99.417  | 99.444  |
| 2  | 29.657 | 75573    | 979    | 0.583   | 0.556   |
| 总计 |        | 12962214 | 176048 | 100.000 | 100.000 |

**(R)-ethyl 3-(2-(4-fluorophenyl)-2-oxoethyl)-2,3-dihydrobenzo[d]isothiazole**

**-3-carboxylate 1,1-dioxide (1ad)**

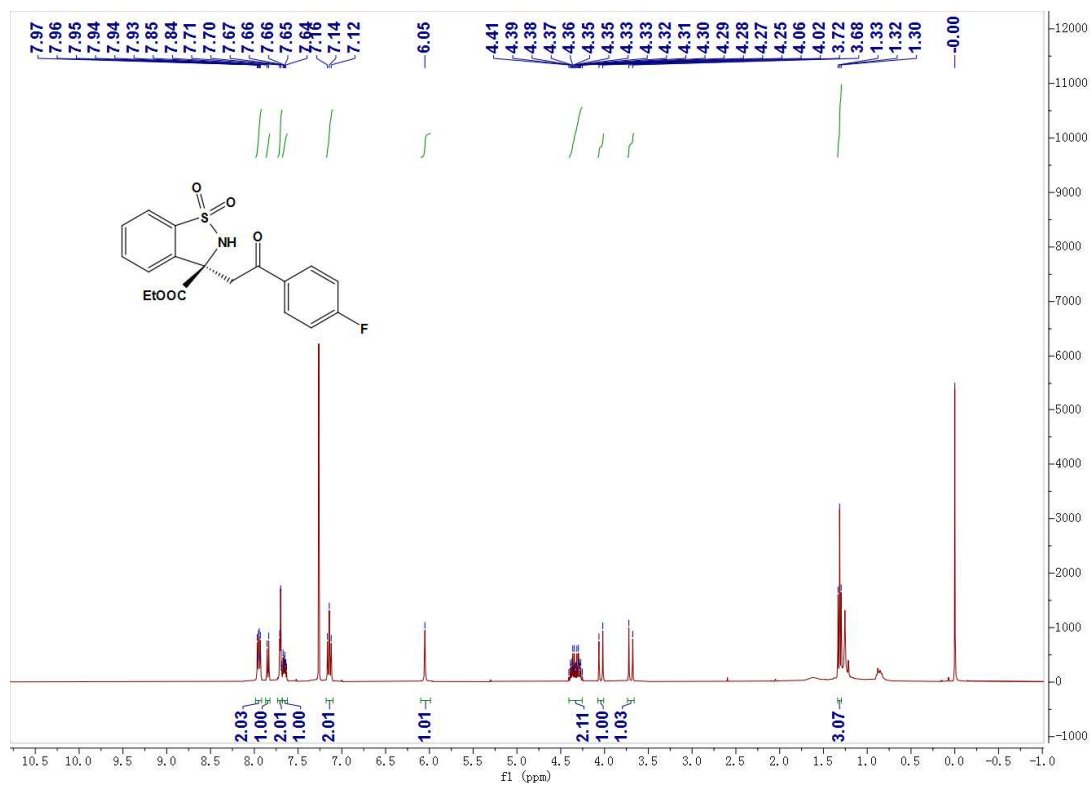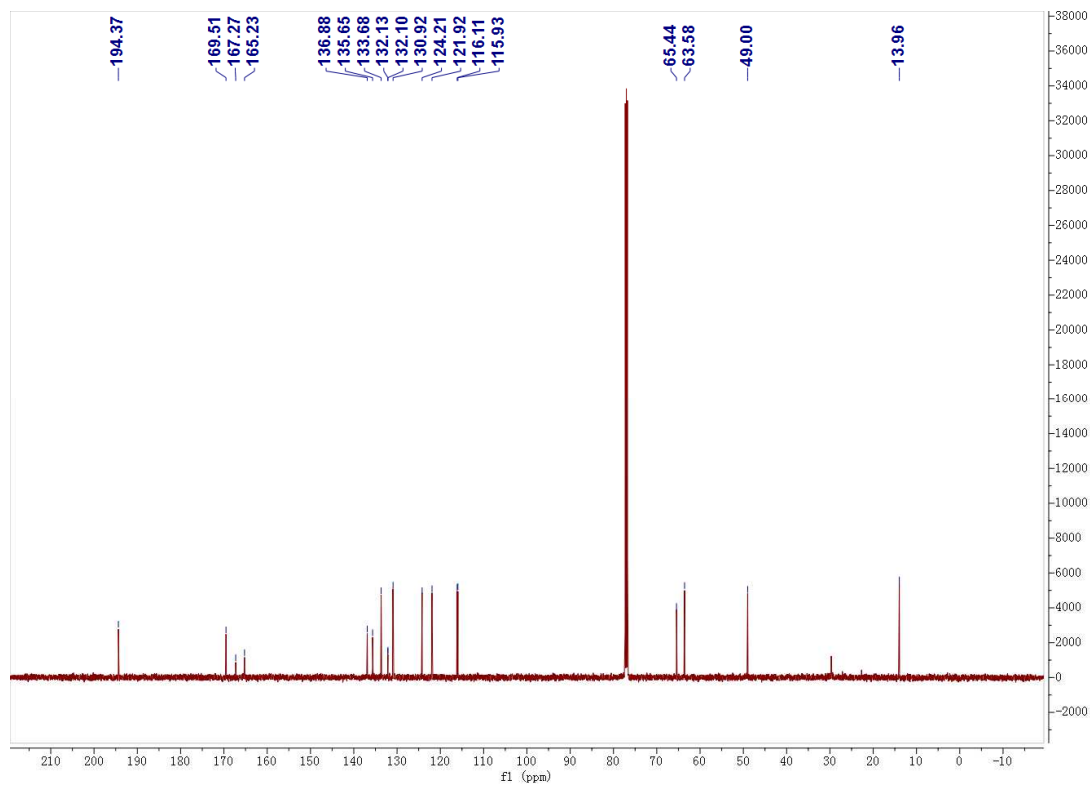



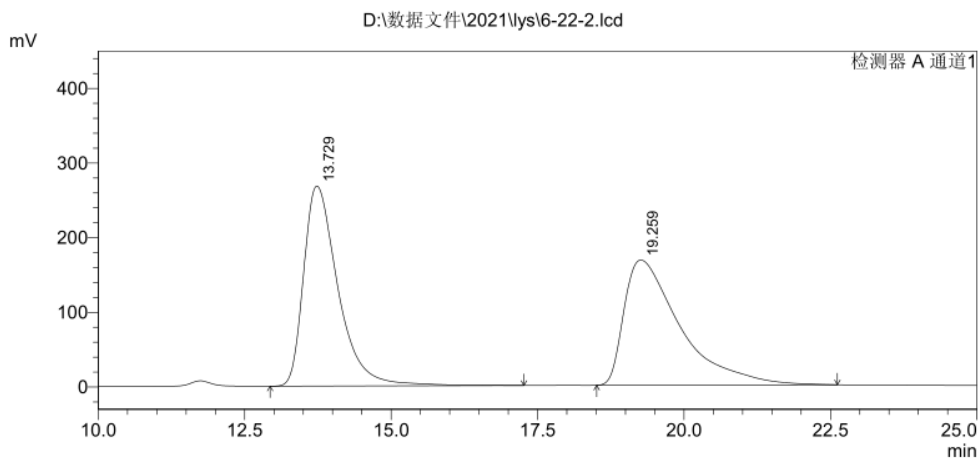

峰表

| 峰# | 保留时间   | 面积       | 高度     | 面积 %    | 高度 %    |
|----|--------|----------|--------|---------|---------|
| 1  | 13.729 | 10951424 | 268133 | 49.521  | 61.507  |
| 2  | 19.259 | 11163219 | 167810 | 50.479  | 38.493  |
| 总计 |        | 22114643 | 435943 | 100.000 | 100.000 |

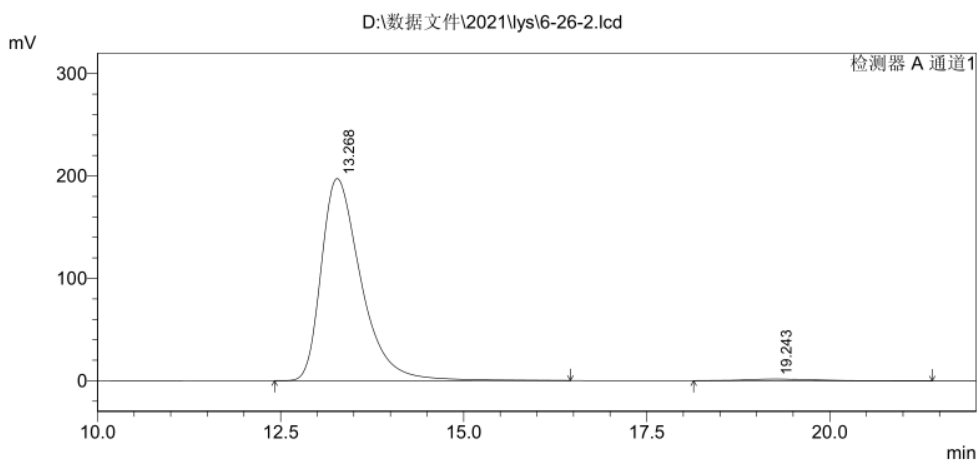

峰表

| 峰# | 保留时间   | 面积      | 高度     | 面积 %    | 高度 %    |
|----|--------|---------|--------|---------|---------|
| 1  | 13.268 | 7451167 | 197458 | 98.538  | 99.173  |
| 2  | 19.243 | 110524  | 1647   | 1.462   | 0.827   |
| 总计 |        | 7561692 | 199104 | 100.000 | 100.000 |

**(R)-ethyl 3-(2-(4-chlorophenyl)-2-oxoethyl)-2,3-dihydrobenzo[d]isothiazole**

**-3-carboxylate 1,1-dioxide (1ae)**

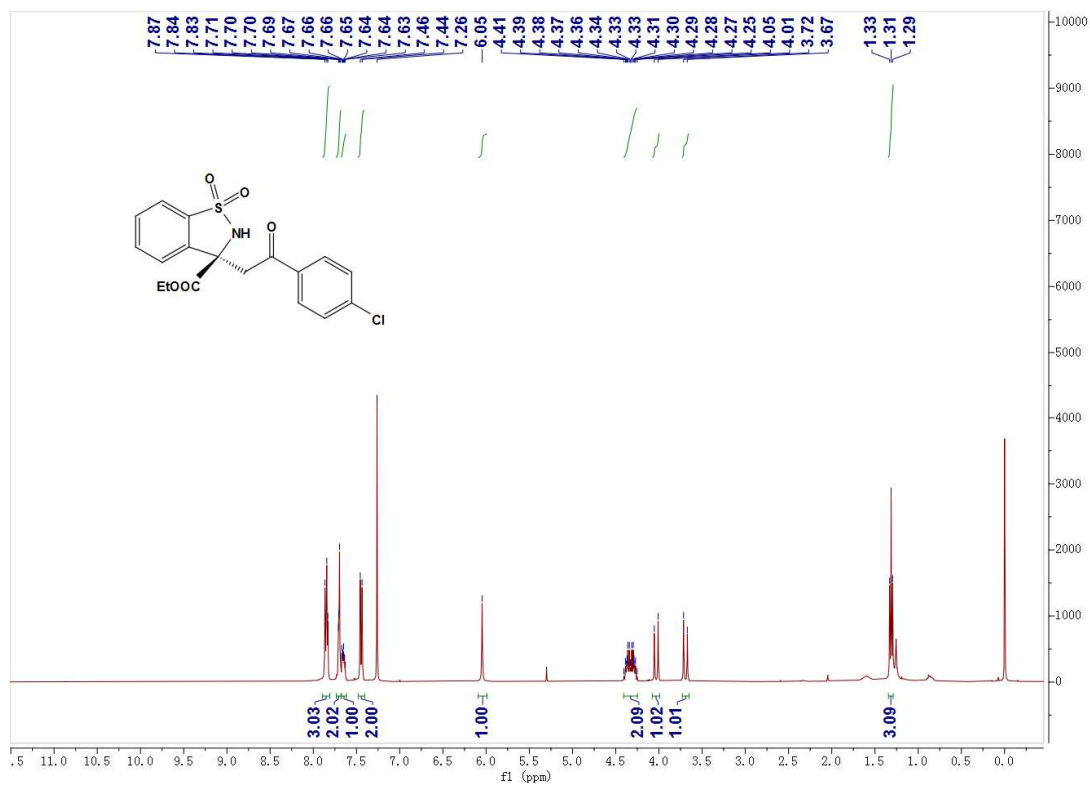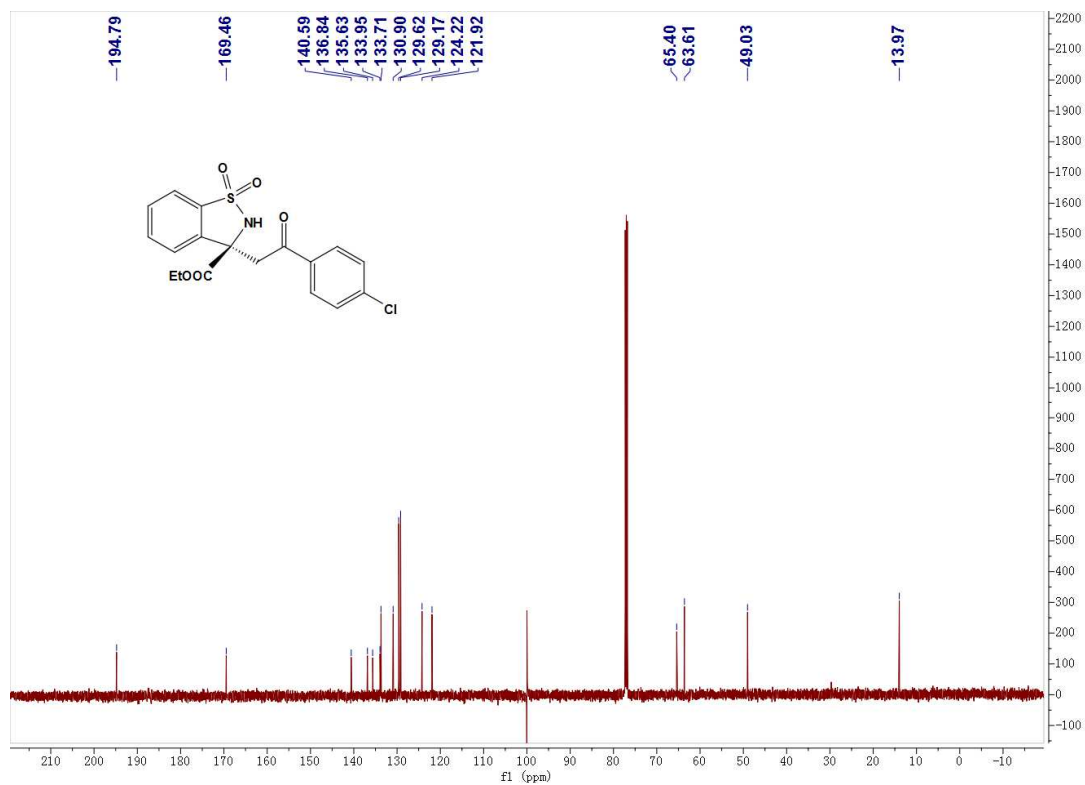

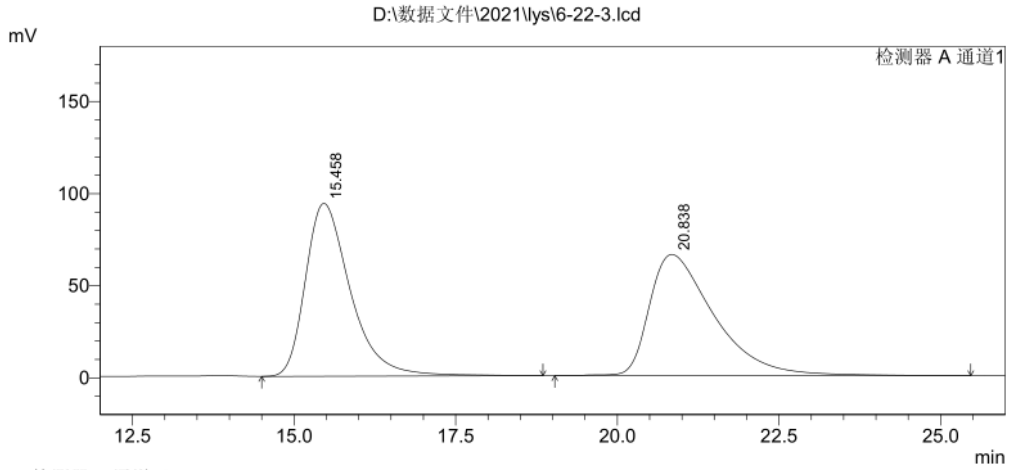

峰表

| 峰# | 保留时间   | 面积      | 高度     | 面积 %    | 高度 %    |
|----|--------|---------|--------|---------|---------|
| 1  | 15.458 | 4547351 | 93882  | 49.755  | 58.783  |
| 2  | 20.838 | 4592090 | 65827  | 50.245  | 41.217  |
| 总计 |        | 9139440 | 159709 | 100.000 | 100.000 |

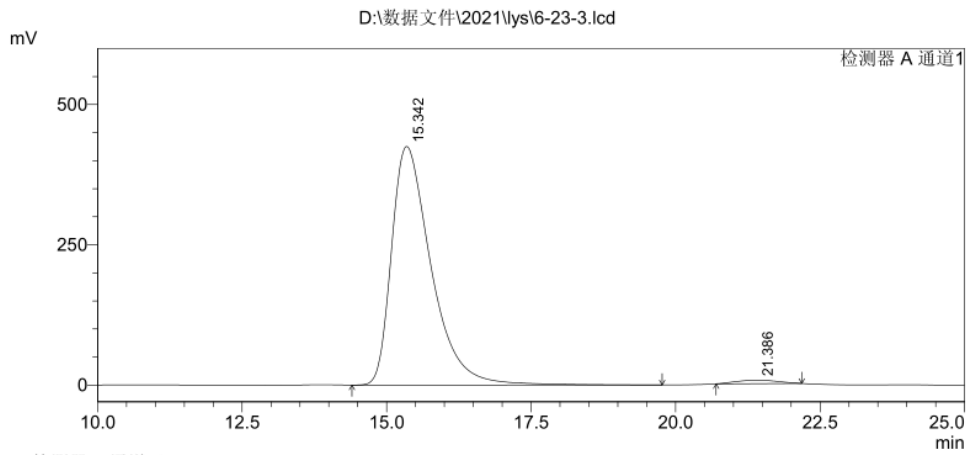

峰表

| 峰# | 保留时间   | 面积       | 高度     | 面积 %    | 高度 %    |
|----|--------|----------|--------|---------|---------|
| 1  | 15.342 | 20239974 | 425240 | 98.482  | 98.551  |
| 2  | 21.386 | 311910   | 6251   | 1.518   | 1.449   |
| 总计 |        | 20551885 | 431490 | 100.000 | 100.000 |

**(R)-ethyl 3-(2-oxo-2-(4-(trifluoromethyl)phenyl)ethyl)-2,3-dihydrobenzo[d]isothiazole-3-carboxylate 1,1-dioxide (1af)**

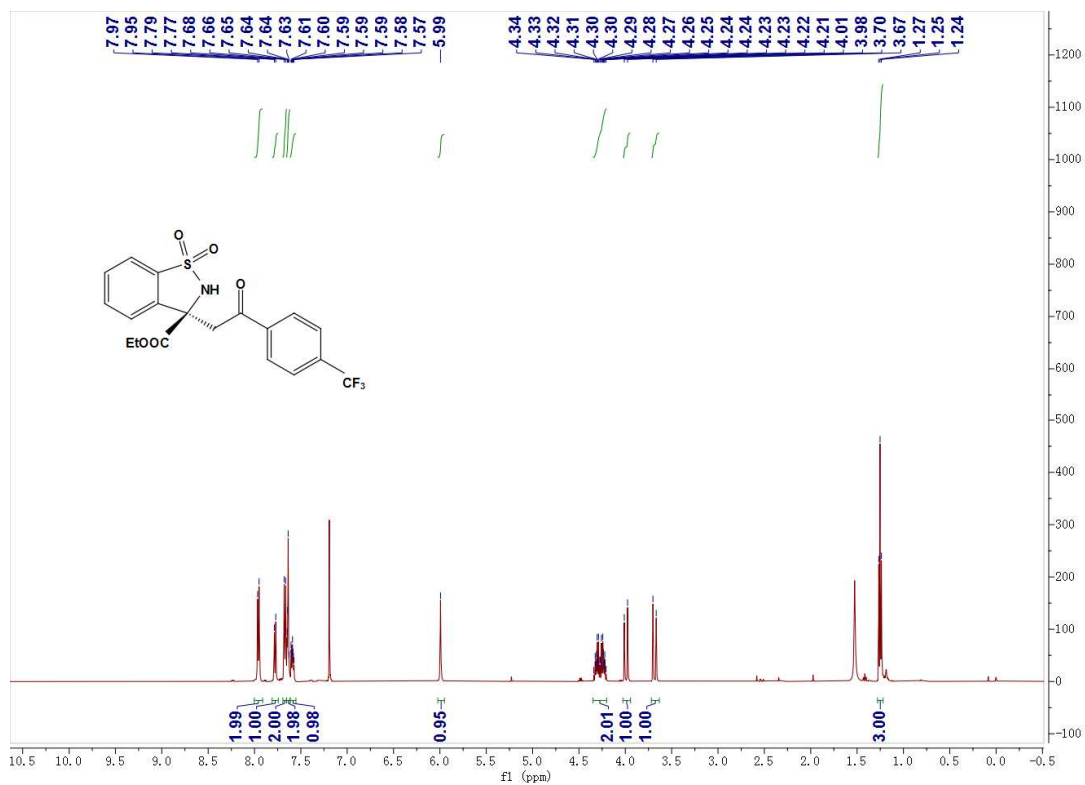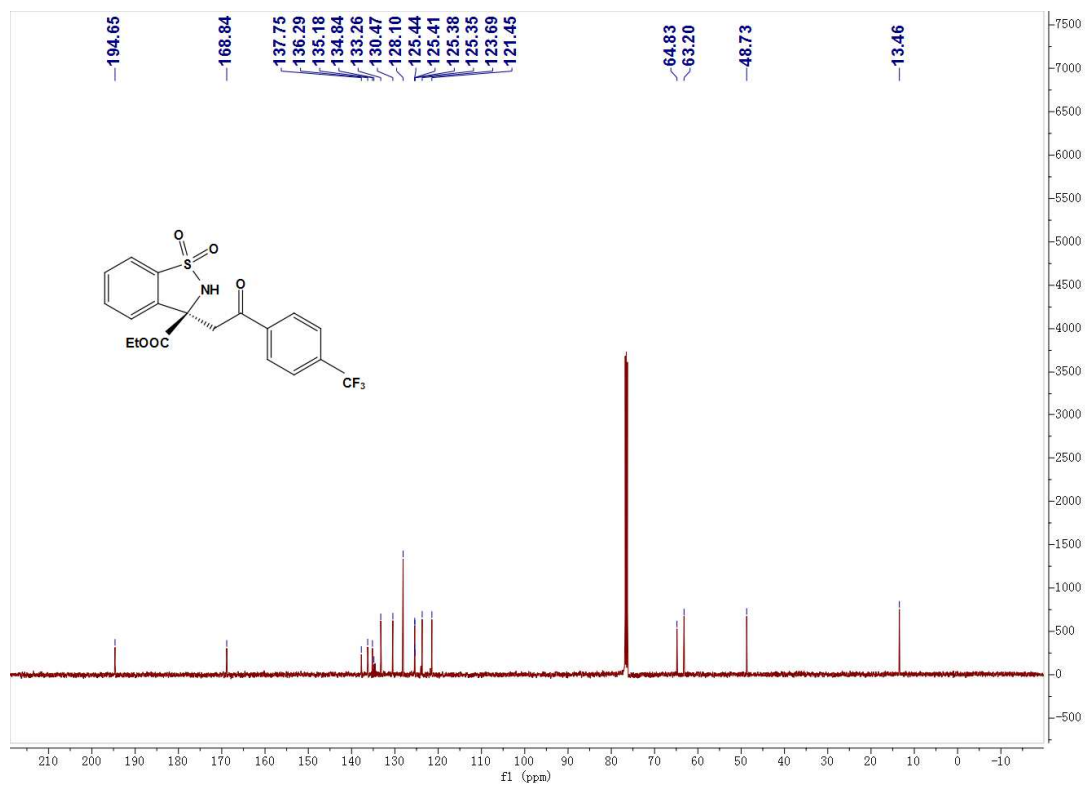

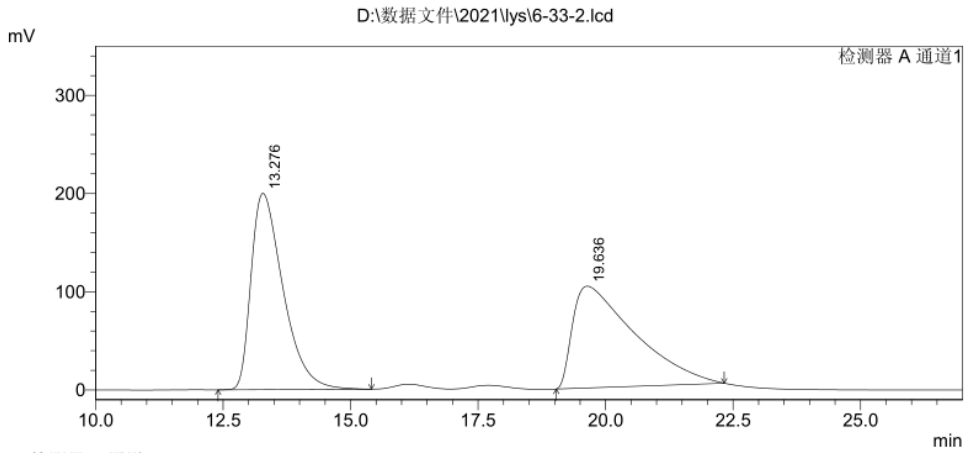

1 检测器 A 通道1/254nm

峰表

| 检测器 A Ch1 254nm |        |          |        |         |         |
|-----------------|--------|----------|--------|---------|---------|
| 峰#              | 保留时间   | 面积       | 高度     | 面积 %    | 高度 %    |
| 1               | 13.276 | 8730102  | 200051 | 49.907  | 65.879  |
| 2               | 19.636 | 8762581  | 103615 | 50.093  | 34.121  |
| 总计              |        | 17492683 | 303666 | 100.000 | 100.000 |

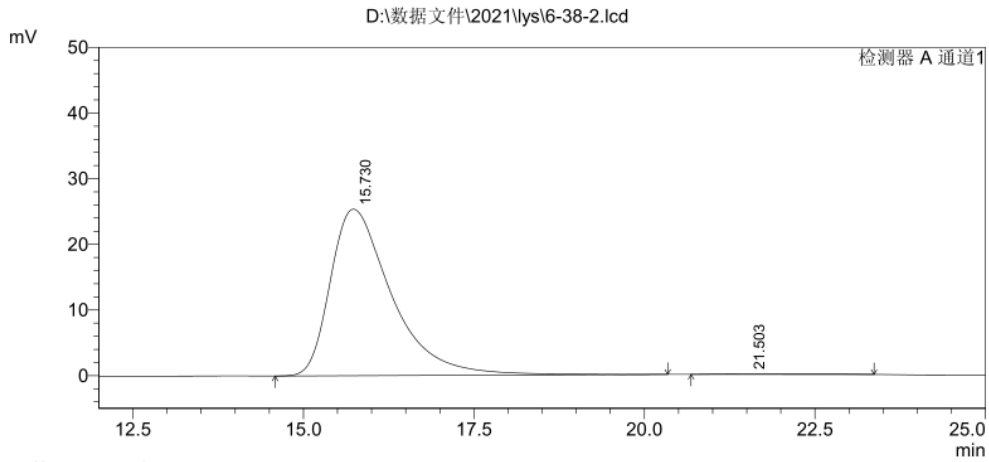

1 检测器 A 通道1/254nm

峰表

| 检测器 A Ch1 254nm |        |         |       |         |         |
|-----------------|--------|---------|-------|---------|---------|
| 峰#              | 保留时间   | 面积      | 高度    | 面积 %    | 高度 %    |
| 1               | 15.730 | 1589715 | 25383 | 99.363  | 99.616  |
| 2               | 21.503 | 10184   | 98    | 0.637   | 0.384   |
| 总计              |        | 1599899 | 25481 | 100.000 | 100.000 |

**(R)-ethyl 3-(2-oxo-2-(3-tolyl)ethyl)-2,3-dihydrobenzo[d]isothiazole-3-carboxylate**

**1,1-dioxide (1ag)**

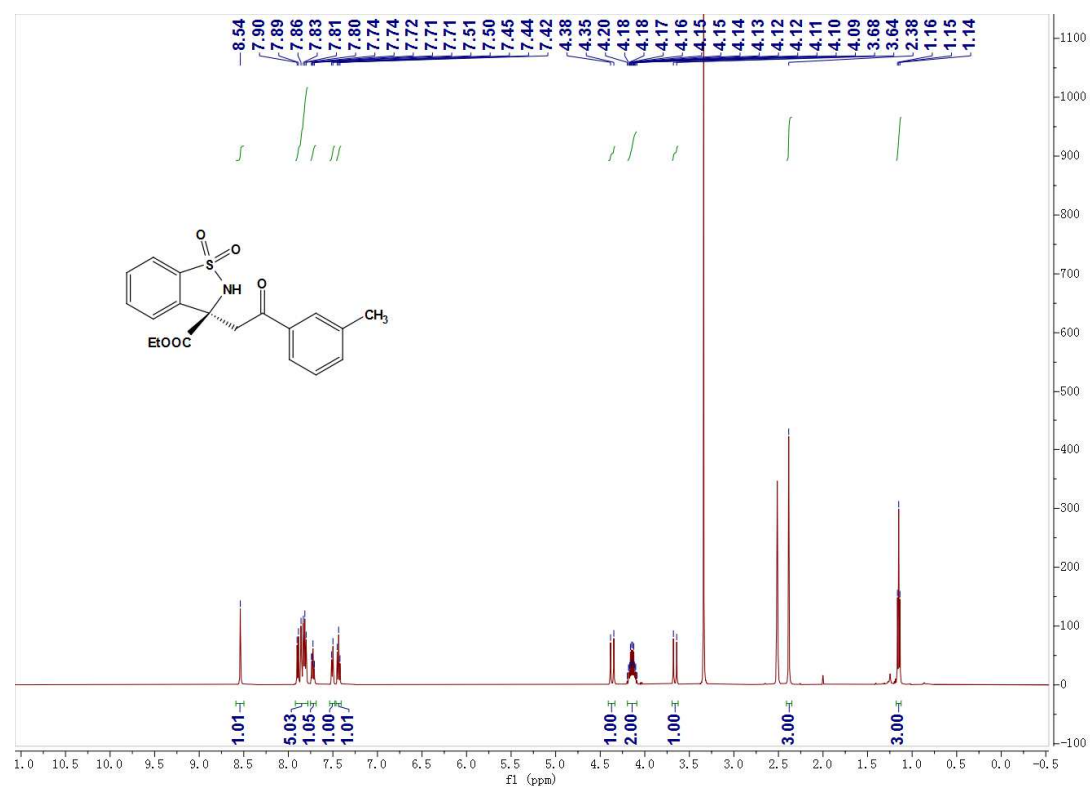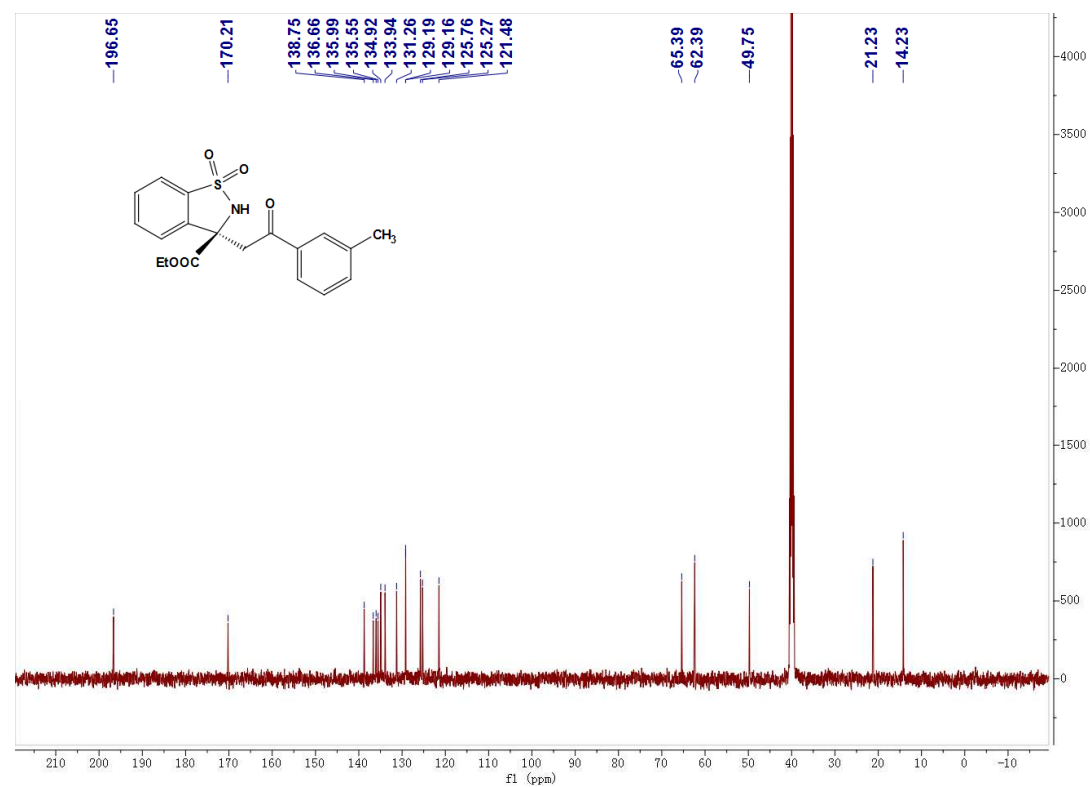

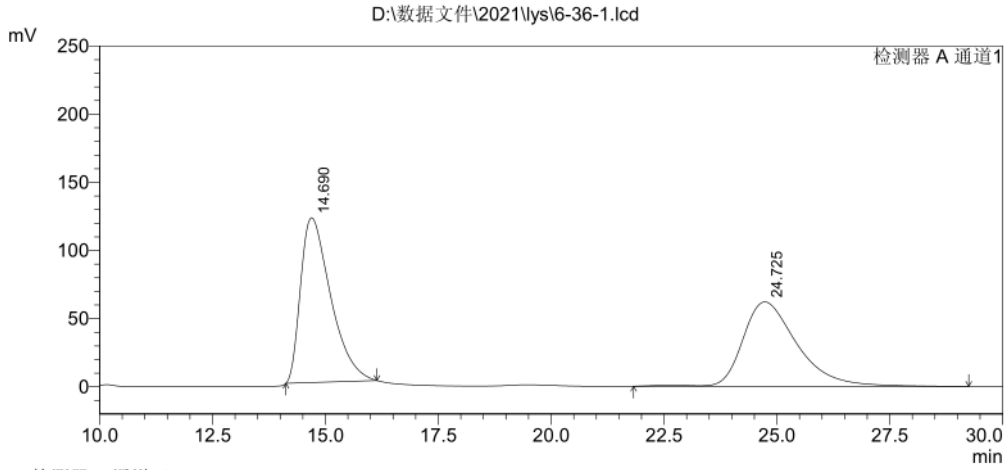

峰表

| 峰# | 保留时间   | 面积       | 高度     | 面积 %    | 高度 %    |
|----|--------|----------|--------|---------|---------|
| 1  | 14.690 | 5610837  | 120963 | 51.964  | 66.137  |
| 2  | 24.725 | 5186669  | 61935  | 48.036  | 33.863  |
| 总计 |        | 10797506 | 182897 | 100.000 | 100.000 |

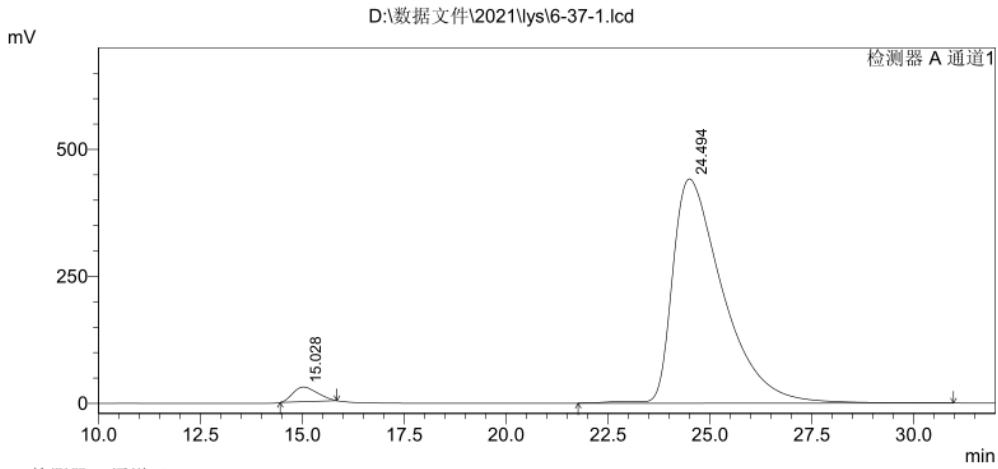

峰表

| 峰# | 保留时间   | 面积       | 高度     | 面积 %    | 高度 %    |
|----|--------|----------|--------|---------|---------|
| 1  | 15.028 | 1207153  | 28930  | 3.081   | 6.150   |
| 2  | 24.494 | 37967430 | 441509 | 96.919  | 93.850  |
| 总计 |        | 39174583 | 470439 | 100.000 | 100.000 |

**(R)-ethyl 3-(2-(3-methoxyphenyl)-2-oxoethyl)-2,3-dihydrobenzo[d]**

**isothiazole-3-carboxylate 1,1-dioxide (1ah)**

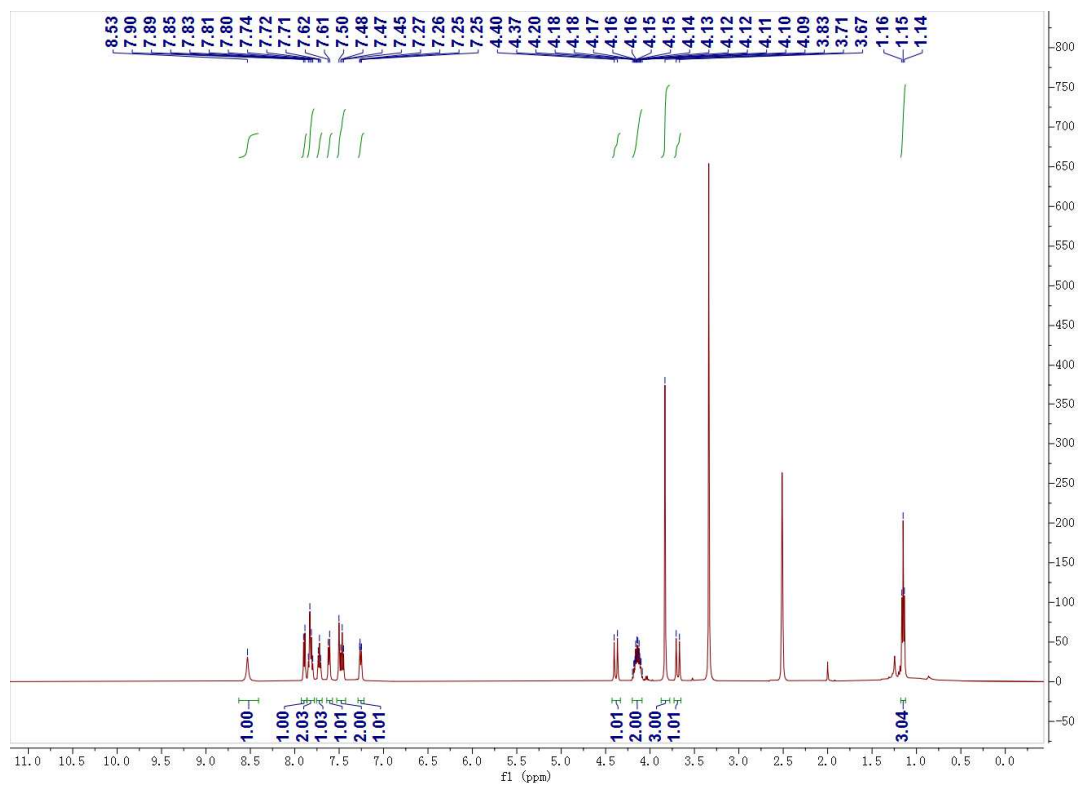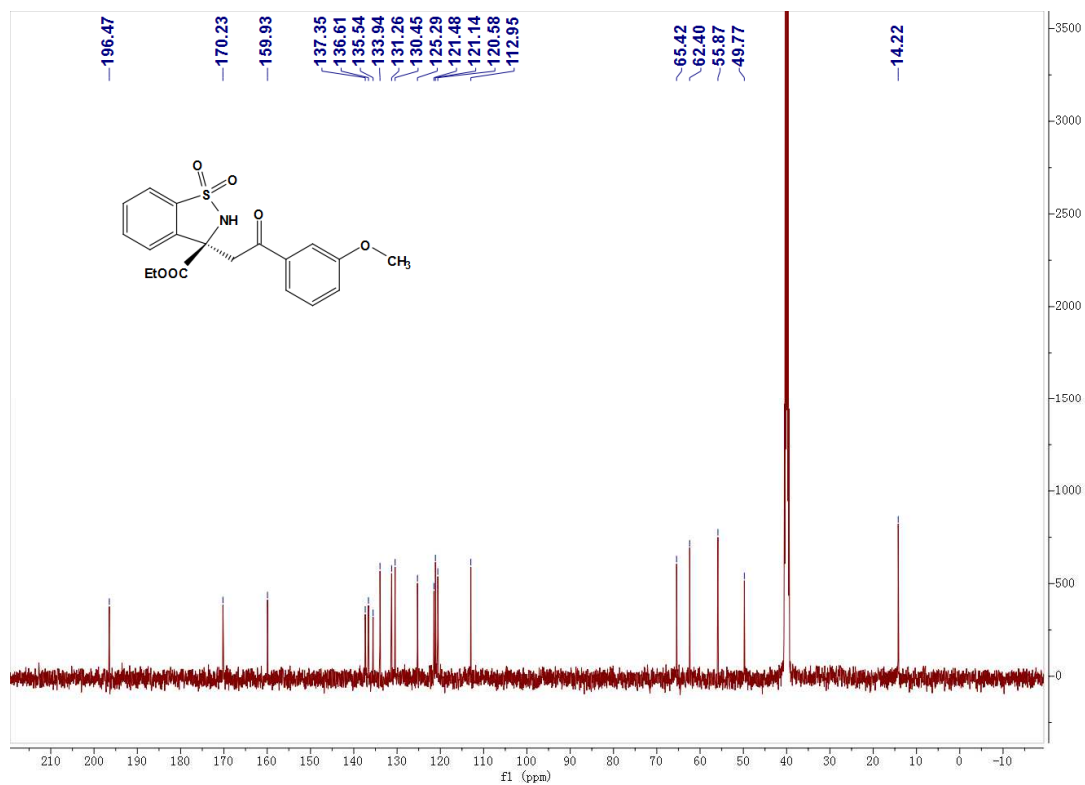



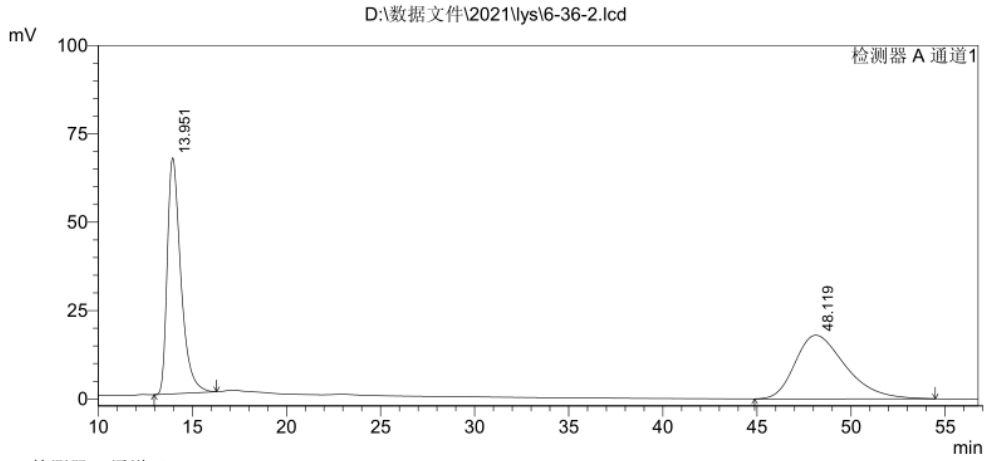

峰表

| 峰# | 保留时间   | 面积      | 高度    | 面积 %    | 高度 %    |
|----|--------|---------|-------|---------|---------|
| 1  | 13.951 | 3344537 | 66806 | 49.982  | 78.771  |
| 2  | 48.119 | 3346904 | 18005 | 50.018  | 21.229  |
| 总计 |        | 6691441 | 84811 | 100.000 | 100.000 |

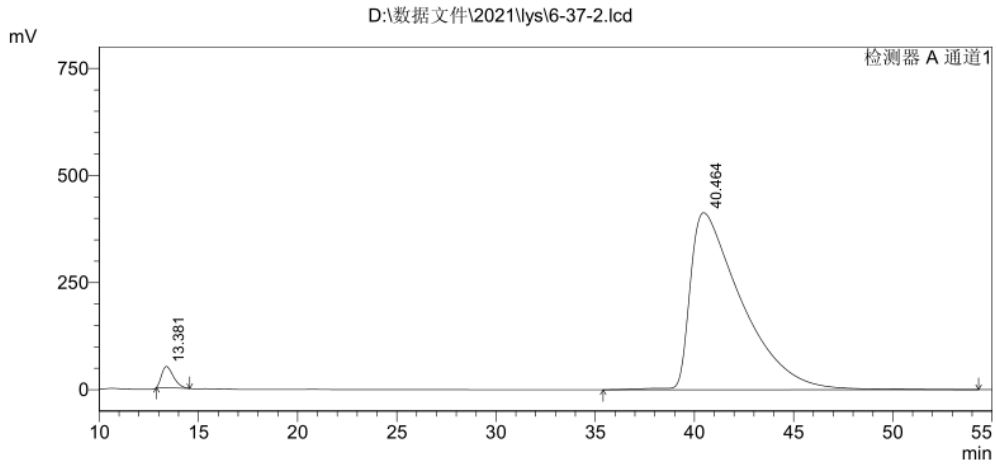

峰表

| 峰# | 保留时间   | 面积       | 高度     | 面积 %    | 高度 %    |
|----|--------|----------|--------|---------|---------|
| 1  | 13.381 | 2055418  | 49516  | 2.682   | 10.702  |
| 2  | 40.464 | 74580817 | 413172 | 97.318  | 89.298  |
| 总计 |        | 76636235 | 462688 | 100.000 | 100.000 |

**(R)-ethyl 3-(2-(3-chlorophenyl)-2-oxoethyl)-2,3-dihydrobenzo[d]isothiazole**

**-3-carboxylate 1,1-dioxide (1ai)**

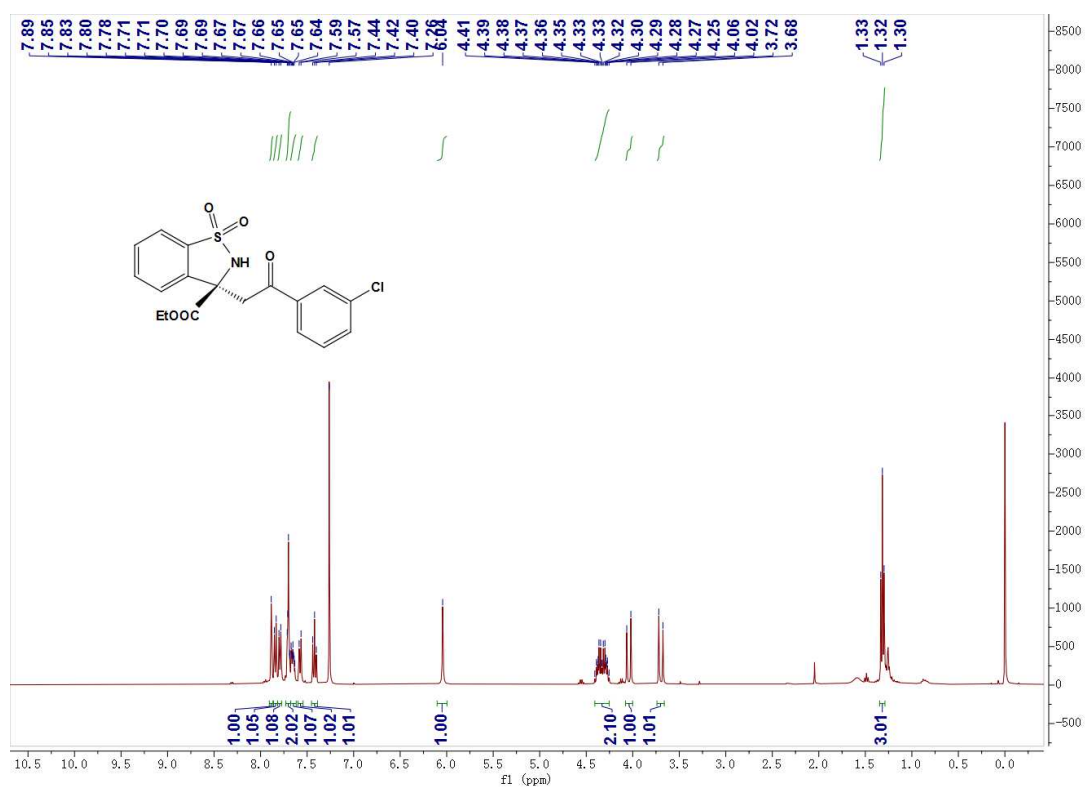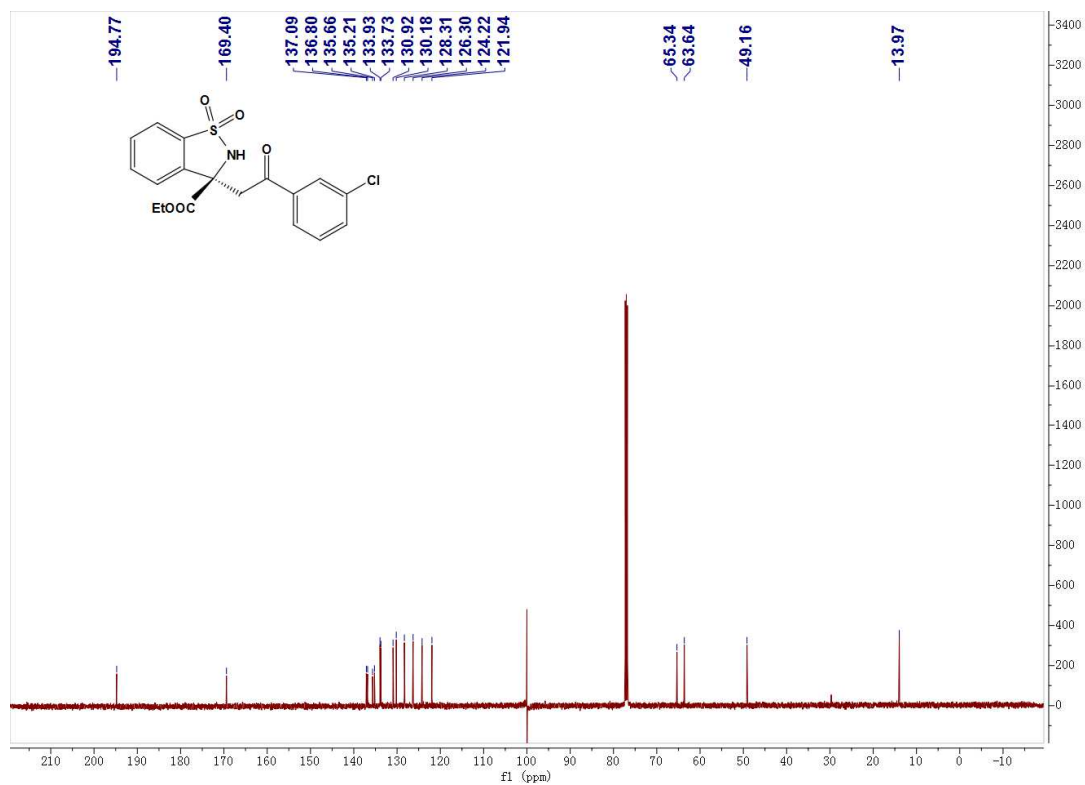

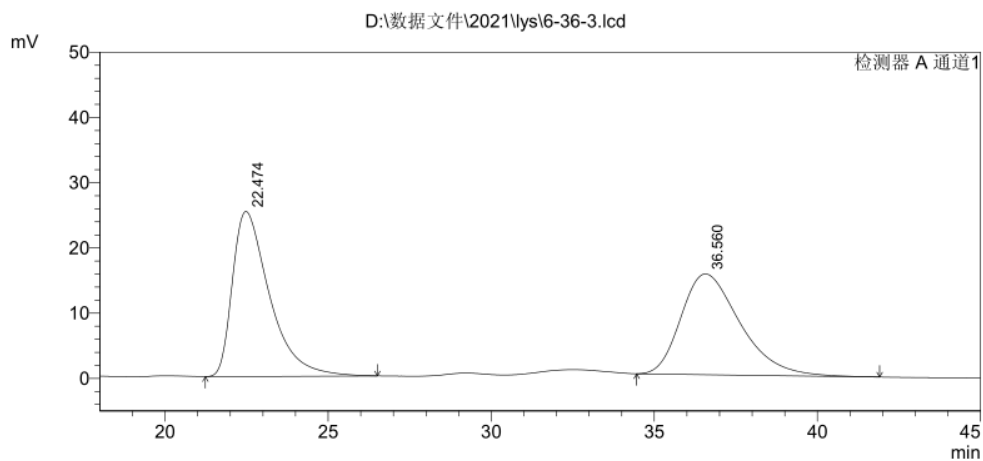

峰表

| 峰# | 保留时间   | 面积      | 高度    | 面积 %    | 高度 %    |
|----|--------|---------|-------|---------|---------|
| 1  | 22.474 | 2005817 | 25294 | 50.729  | 62.080  |
| 2  | 36.560 | 1948186 | 15450 | 49.271  | 37.920  |
| 总计 |        | 3954003 | 40744 | 100.000 | 100.000 |

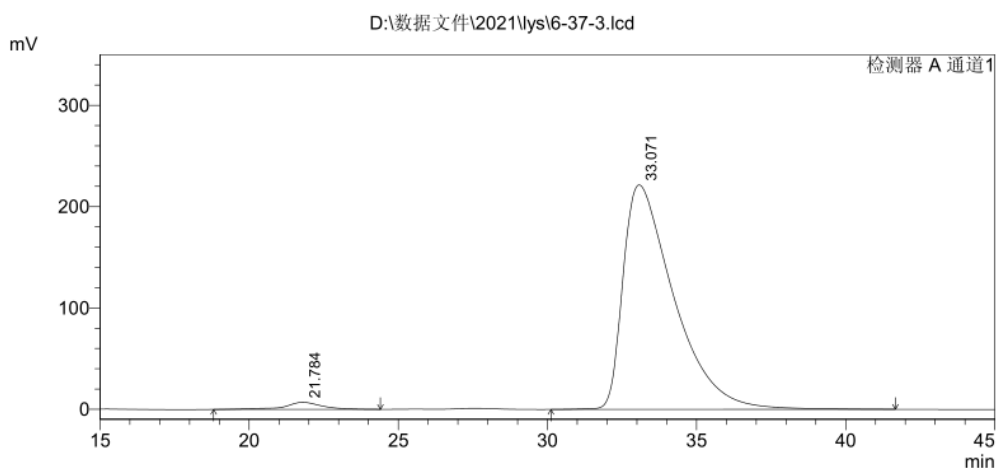

峰表

| 峰# | 保留时间   | 面积       | 高度     | 面积 %    | 高度 %    |
|----|--------|----------|--------|---------|---------|
| 1  | 21.784 | 609510   | 6998   | 2.263   | 3.060   |
| 2  | 33.071 | 26319093 | 221646 | 97.737  | 96.940  |
| 总计 |        | 26928603 | 228644 | 100.000 | 100.000 |

**(R)-ethyl 3-(2-oxo-2-(2-tolyl)ethyl)-2,3-dihydrobenzo[d]isothiazole-3-carboxylate**

**1,1-dioxide (1aj)**

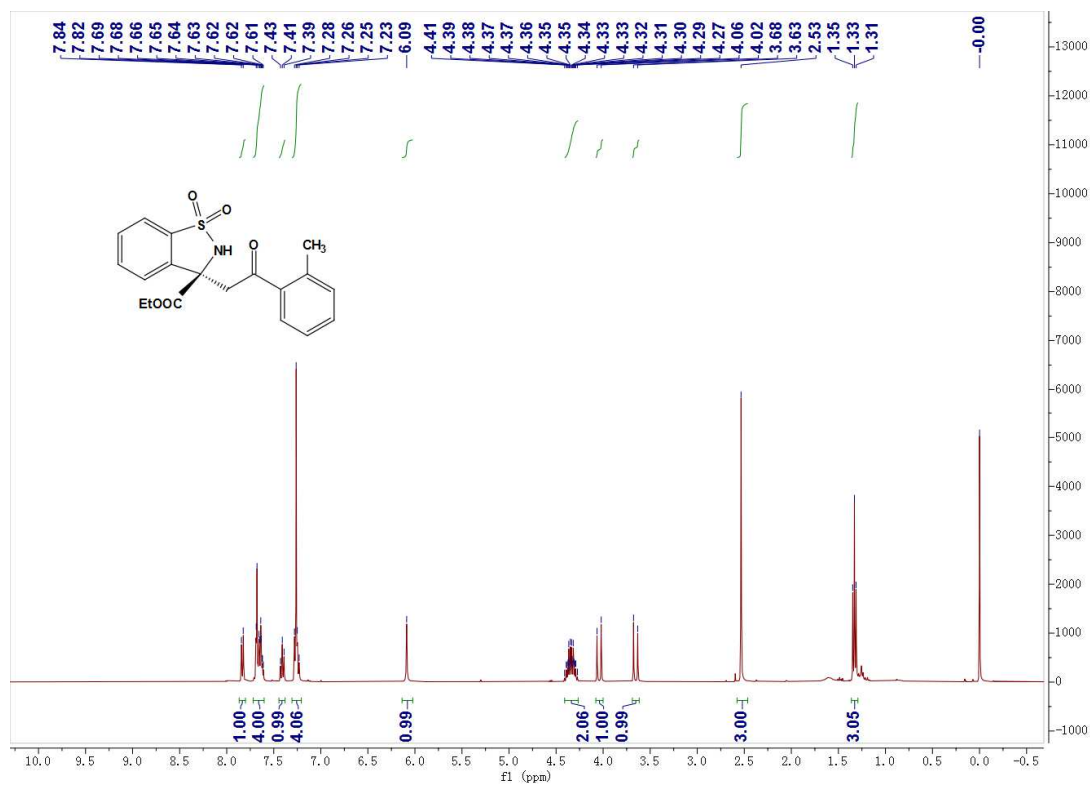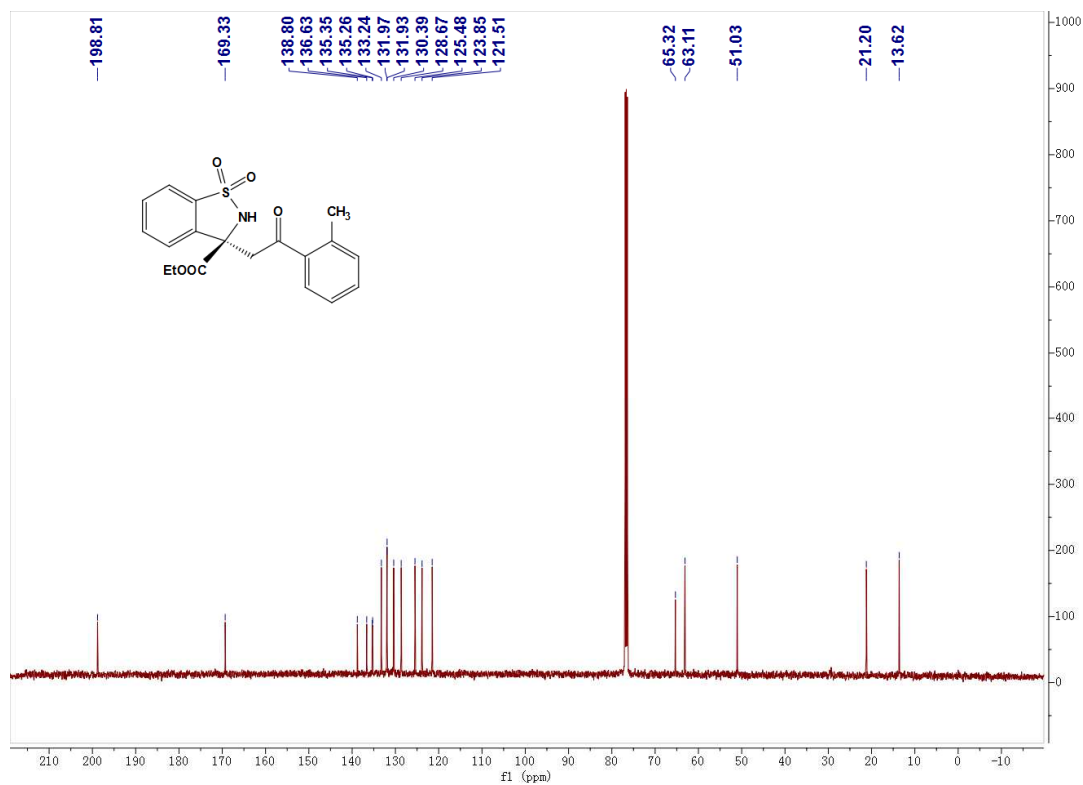

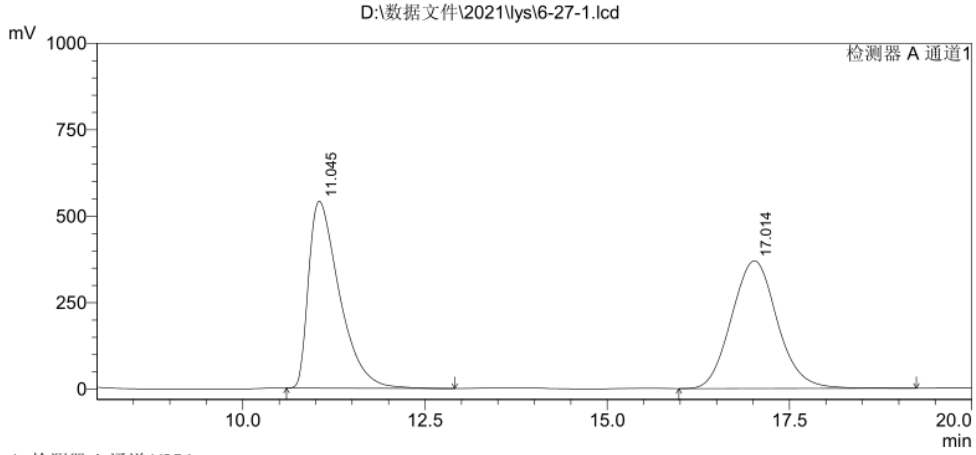

峰表

| 峰# | 保留时间   | 面积       | 高度     | 面积 %    | 高度 %    |
|----|--------|----------|--------|---------|---------|
| 1  | 11.045 | 15928609 | 540714 | 49.701  | 59.424  |
| 2  | 17.014 | 16120497 | 369207 | 50.299  | 40.576  |
| 总计 |        | 32049106 | 909921 | 100.000 | 100.000 |

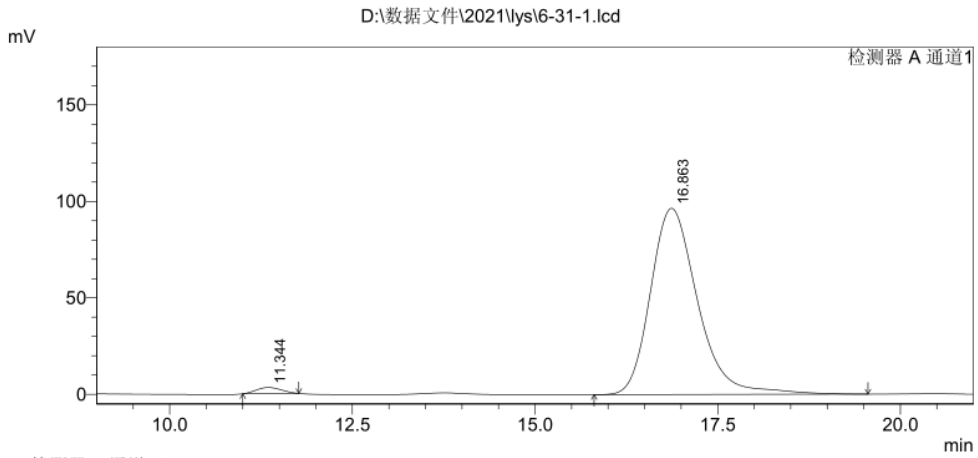

峰表

| 峰# | 保留时间   | 面积      | 高度    | 面积 %    | 高度 %    |
|----|--------|---------|-------|---------|---------|
| 1  | 11.344 | 76173   | 3175  | 1.730   | 3.186   |
| 2  | 16.863 | 4326219 | 96468 | 98.270  | 96.814  |
| 总计 |        | 4402392 | 99643 | 100.000 | 100.000 |

**(R)-ethyl 3-(2-(2-methoxyphenyl)-2-oxoethyl)-2,3-dihydrobenzo[d]isothiazole**

**-3-carboxylate 1,1-dioxide (1ak)**

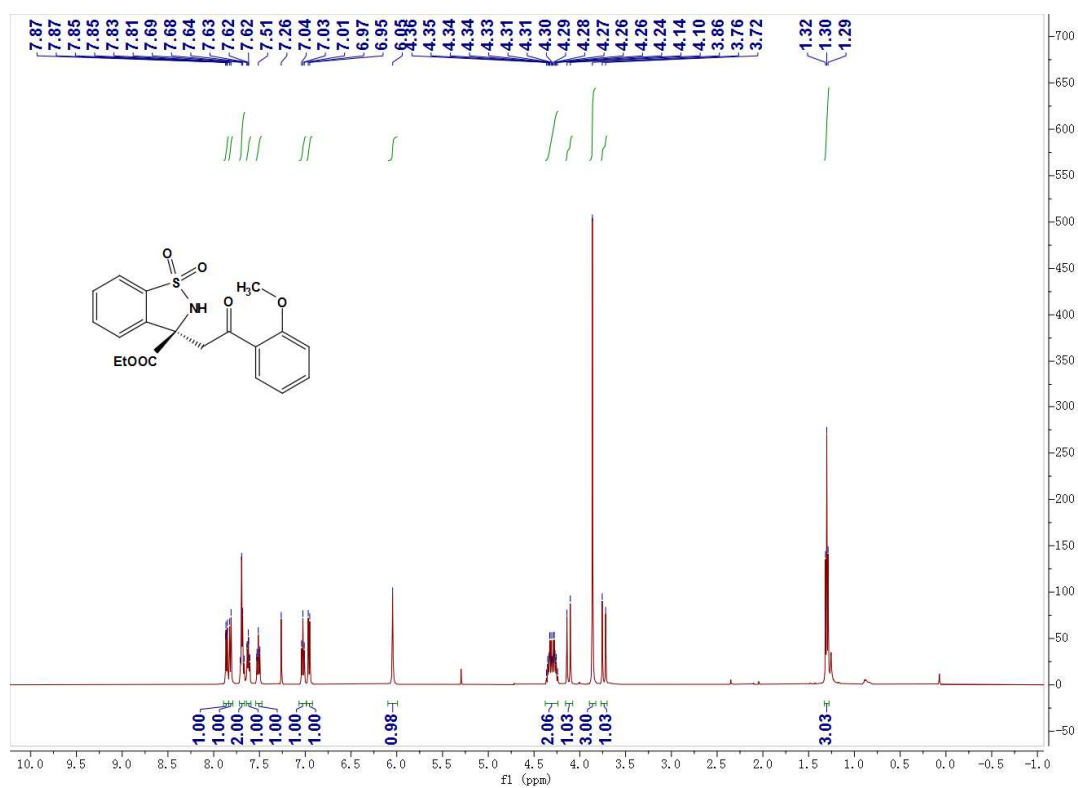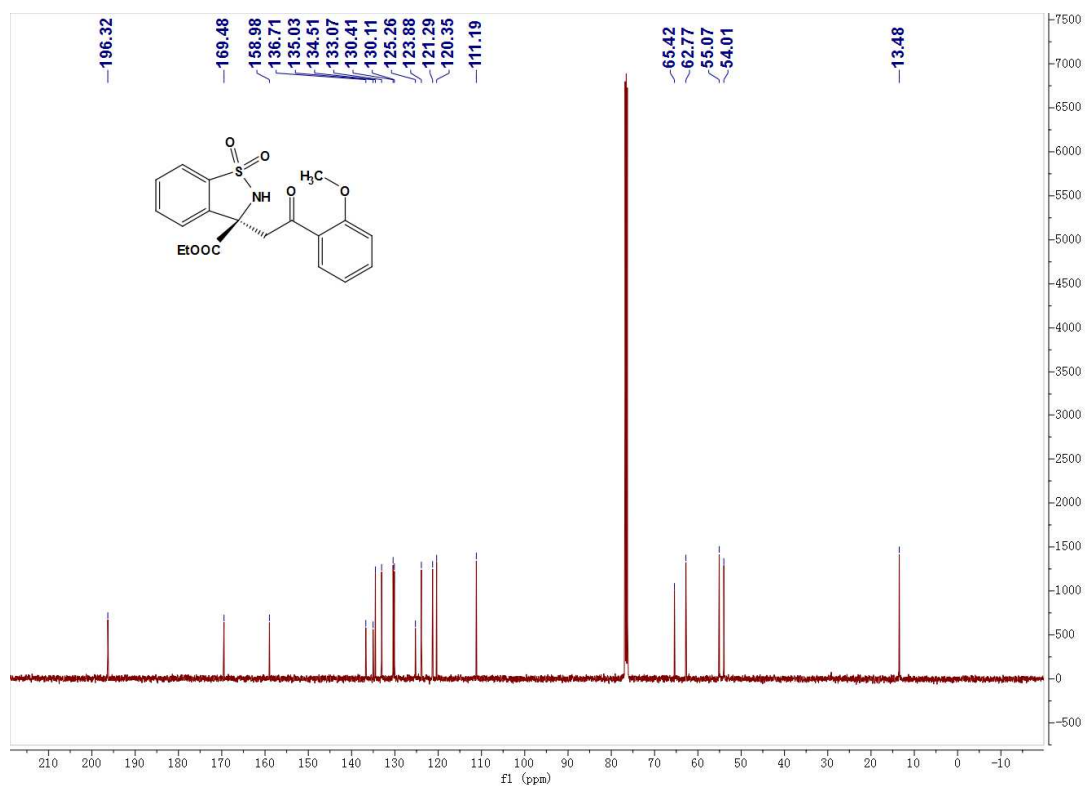

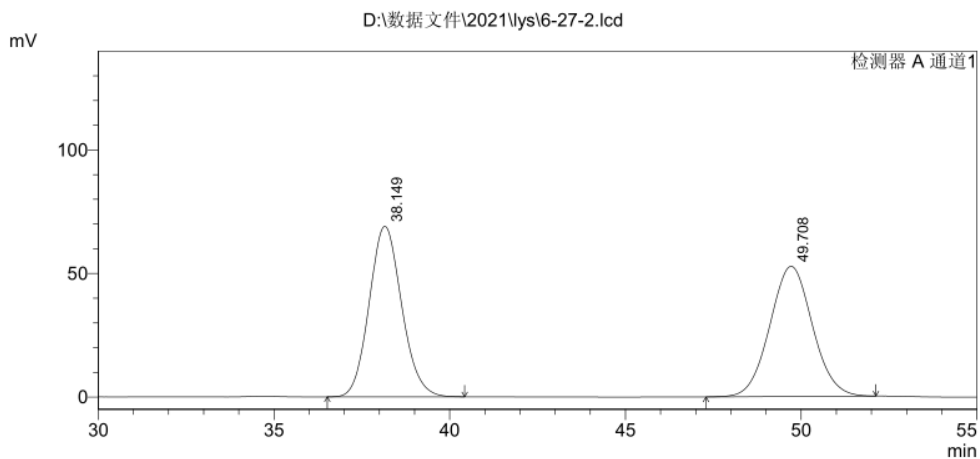

峰表

检测器 A Ch1 254nm

| 峰# | 保留时间   | 面积      | 高度     | 面积 %    | 高度 %    |
|----|--------|---------|--------|---------|---------|
| 1  | 38.149 | 4450958 | 69077  | 50.008  | 56.721  |
| 2  | 49.708 | 4449585 | 52706  | 49.992  | 43.279  |
| 总计 |        | 8900543 | 121783 | 100.000 | 100.000 |

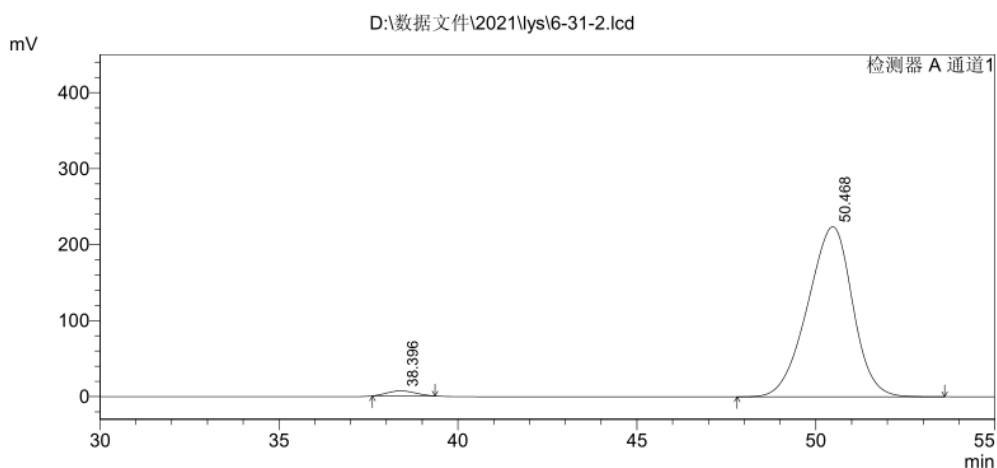

峰表

检测器 A Ch1 254nm

| 峰# | 保留时间   | 面积       | 高度     | 面积 %    | 高度 %    |
|----|--------|----------|--------|---------|---------|
| 1  | 38.396 | 363561   | 6648   | 1.824   | 2.884   |
| 2  | 50.468 | 19568794 | 223864 | 98.176  | 97.116  |
| 总计 |        | 19932355 | 230512 | 100.000 | 100.000 |

**(R)-ethyl 3-(2-(2-bromophenyl)-2-oxoethyl)-2,3-dihydrobenzo[d]isothiazole**

**-3-carboxylate 1,1-dioxide (1a)**

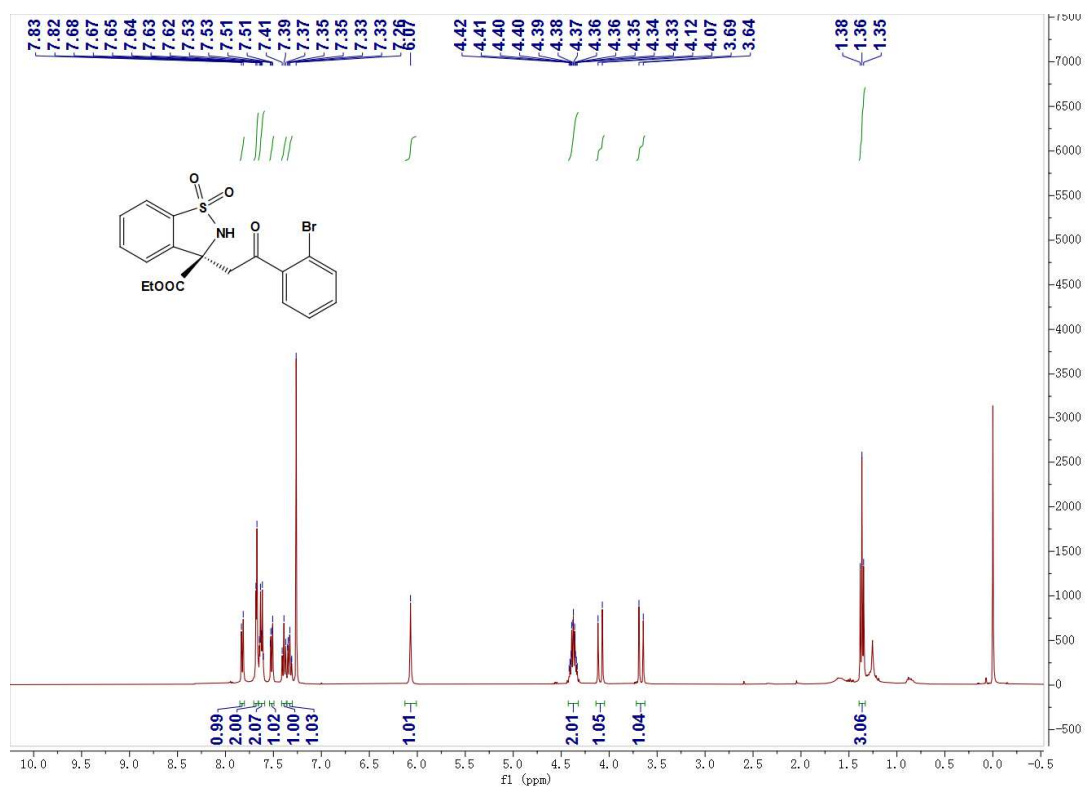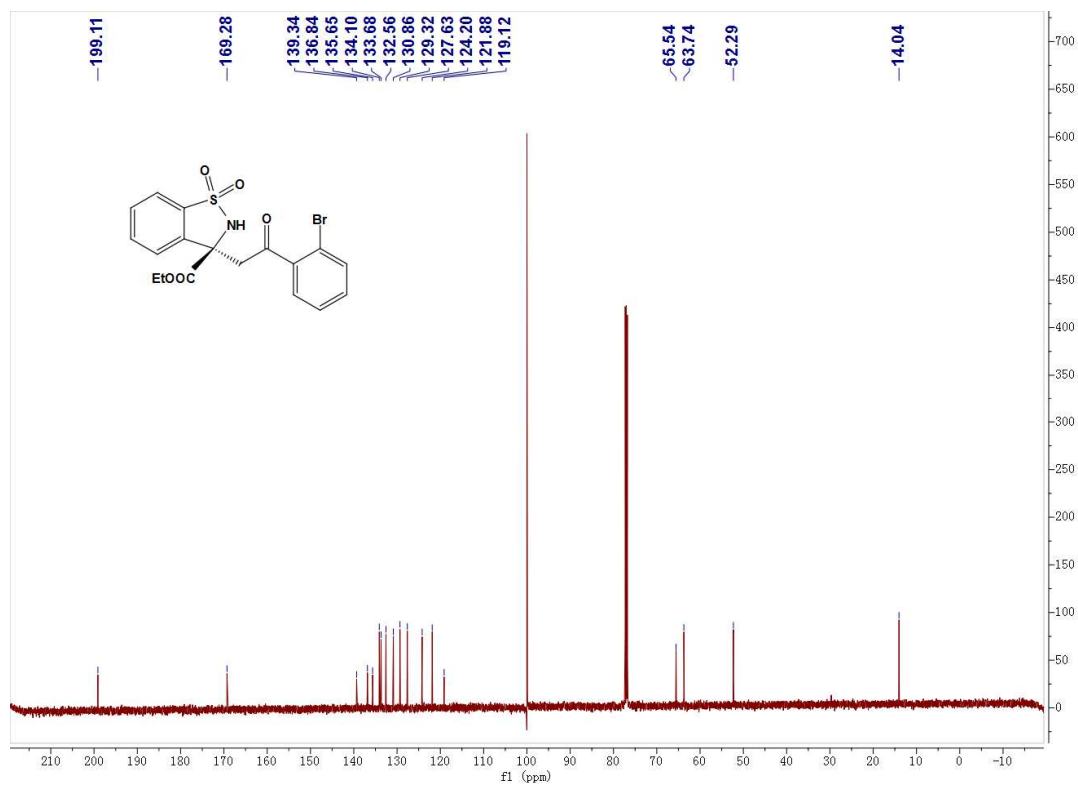



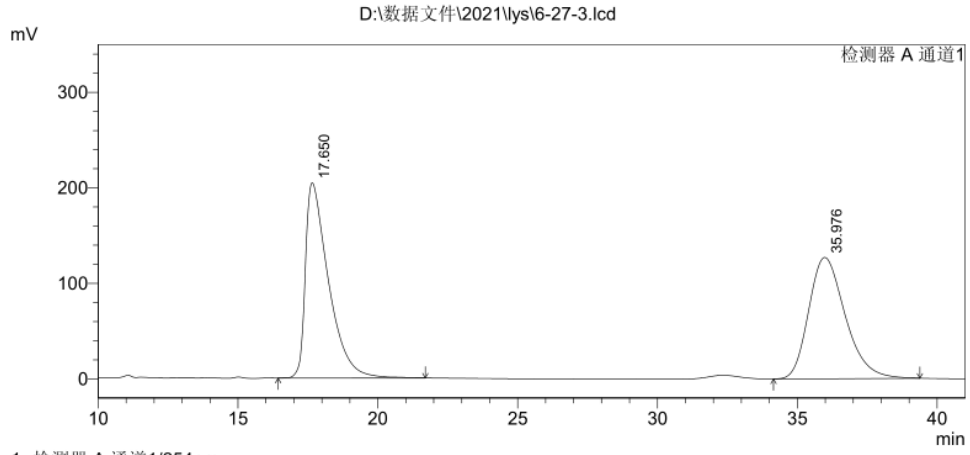

峰表

| 检测器 A Ch1 254nm |        |          |        |         |         |
|-----------------|--------|----------|--------|---------|---------|
| 峰#              | 保留时间   | 面积       | 高度     | 面积 %    | 高度 %    |
| 1               | 17.650 | 11759194 | 204457 | 50.458  | 61.692  |
| 2               | 35.976 | 11545939 | 126957 | 49.542  | 38.308  |
| 总计              |        | 23305133 | 331414 | 100.000 | 100.000 |

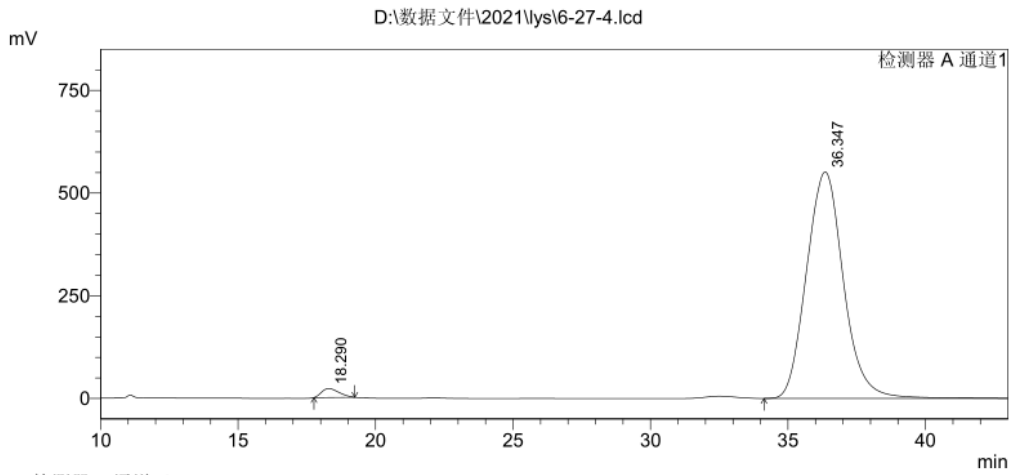

峰表

| 检测器 A Ch1 254nm |        |          |        |         |         |
|-----------------|--------|----------|--------|---------|---------|
| 峰#              | 保留时间   | 面积       | 高度     | 面积 %    | 高度 %    |
| 1               | 18.290 | 944502   | 21588  | 1.793   | 3.767   |
| 2               | 36.347 | 51745338 | 551531 | 98.207  | 96.233  |
| 总计              |        | 52689840 | 573118 | 100.000 | 100.000 |

**(R)-ethyl 5-methoxy-3-(2-(4-methoxyphenyl)-2-oxoethyl)-2,3-dihydrobenzo[d]**

**isothiazole-3-carboxylate 1,1-dioxide (1am)**

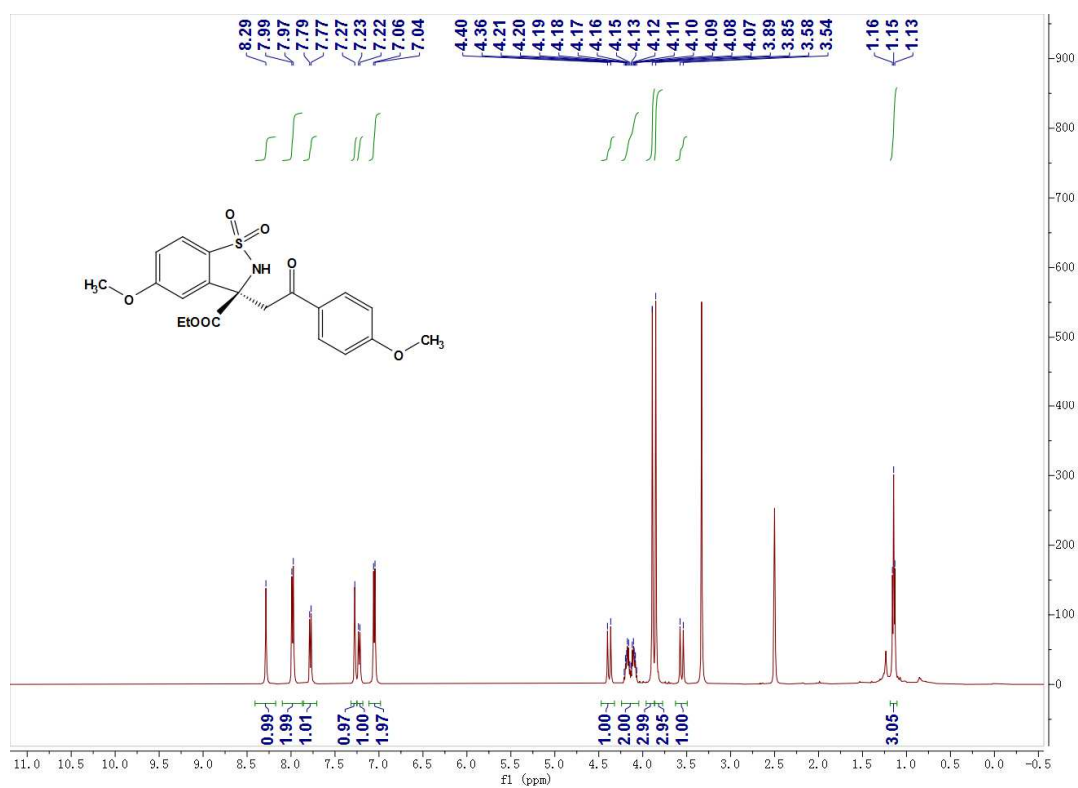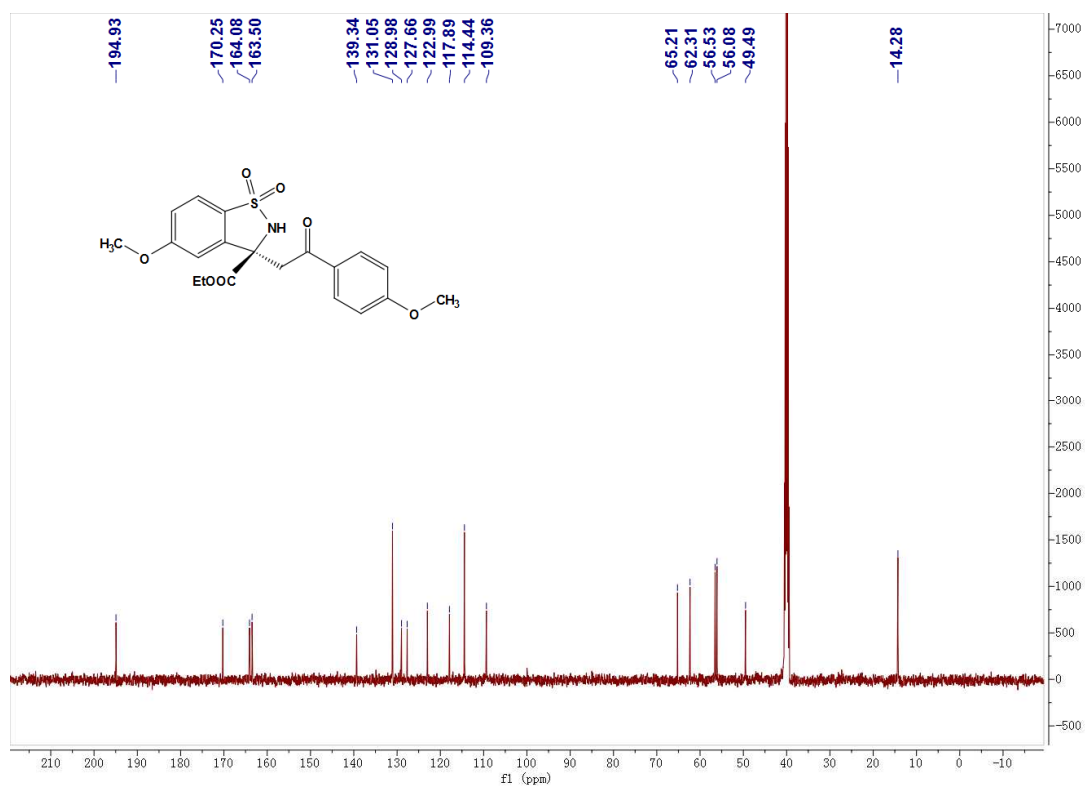

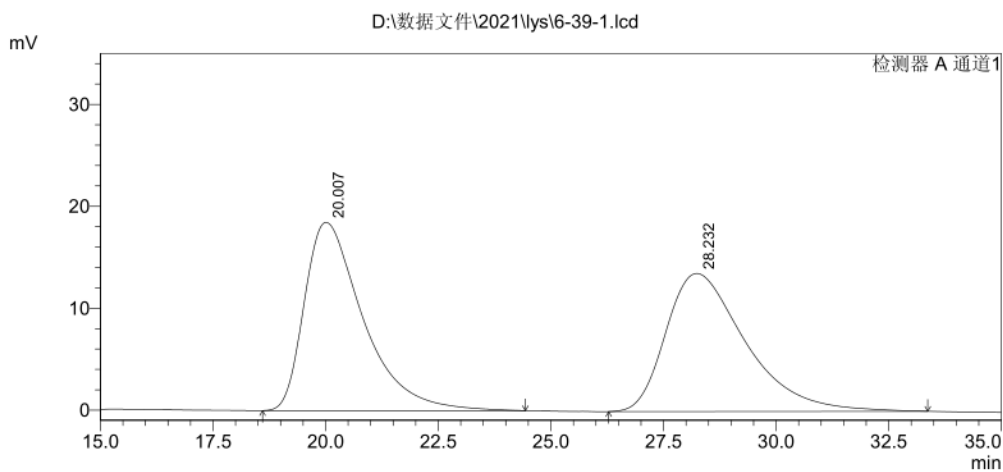

峰表

| 峰# | 保留时间   | 面积      | 高度    | 面积 %    | 高度 %    |
|----|--------|---------|-------|---------|---------|
| 1  | 20.007 | 1677070 | 18480 | 50.157  | 57.704  |
| 2  | 28.232 | 1666542 | 13545 | 49.843  | 42.296  |
| 总计 |        | 3343611 | 32025 | 100.000 | 100.000 |

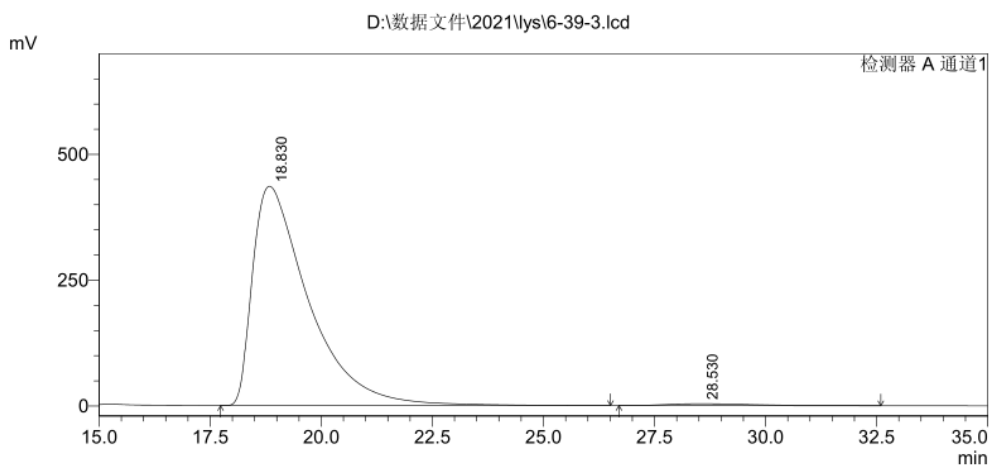

峰表

| 峰# | 保留时间   | 面积       | 高度     | 面积 %    | 高度 %    |
|----|--------|----------|--------|---------|---------|
| 1  | 18.830 | 38359718 | 435881 | 98.739  | 99.160  |
| 2  | 28.530 | 490085   | 3694   | 1.261   | 0.840   |
| 总计 |        | 38849803 | 439575 | 100.000 | 100.000 |

**(R)-ethyl 3-(2-(4-chlorophenyl)-2-oxoethyl)-5-methoxy-2,3-dihydrobenzo[d]**

**isothiazole-3-carboxylate 1,1-dioxide (1an)**

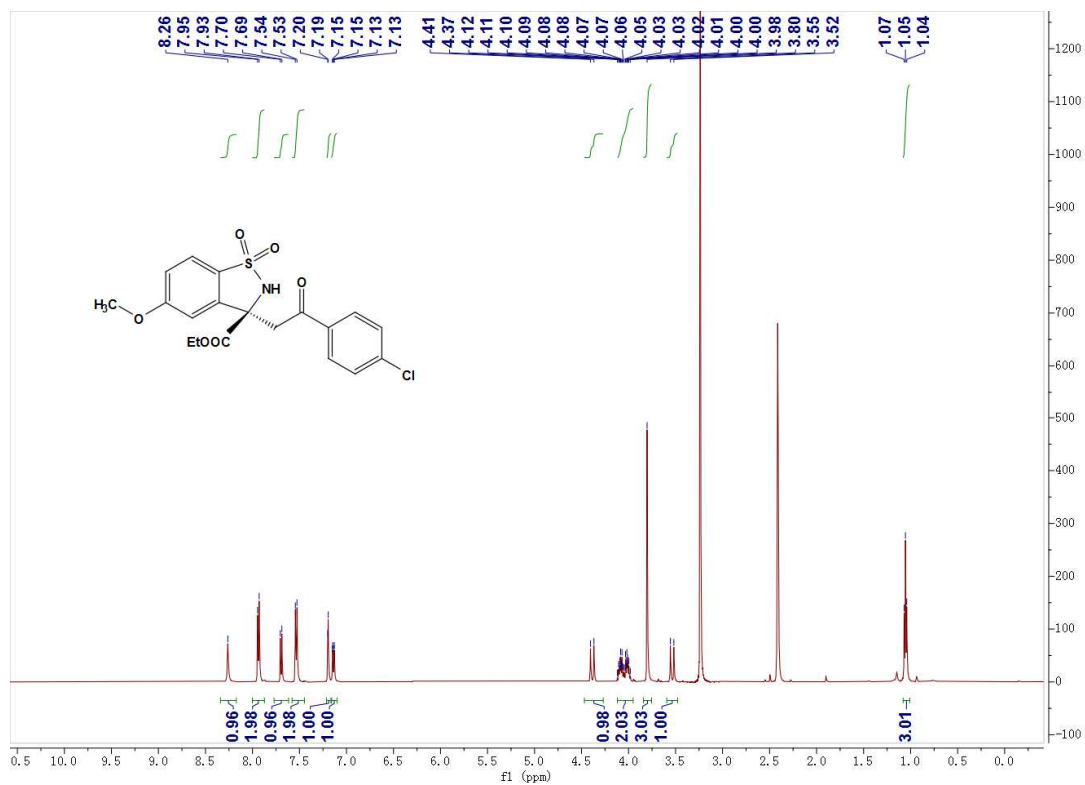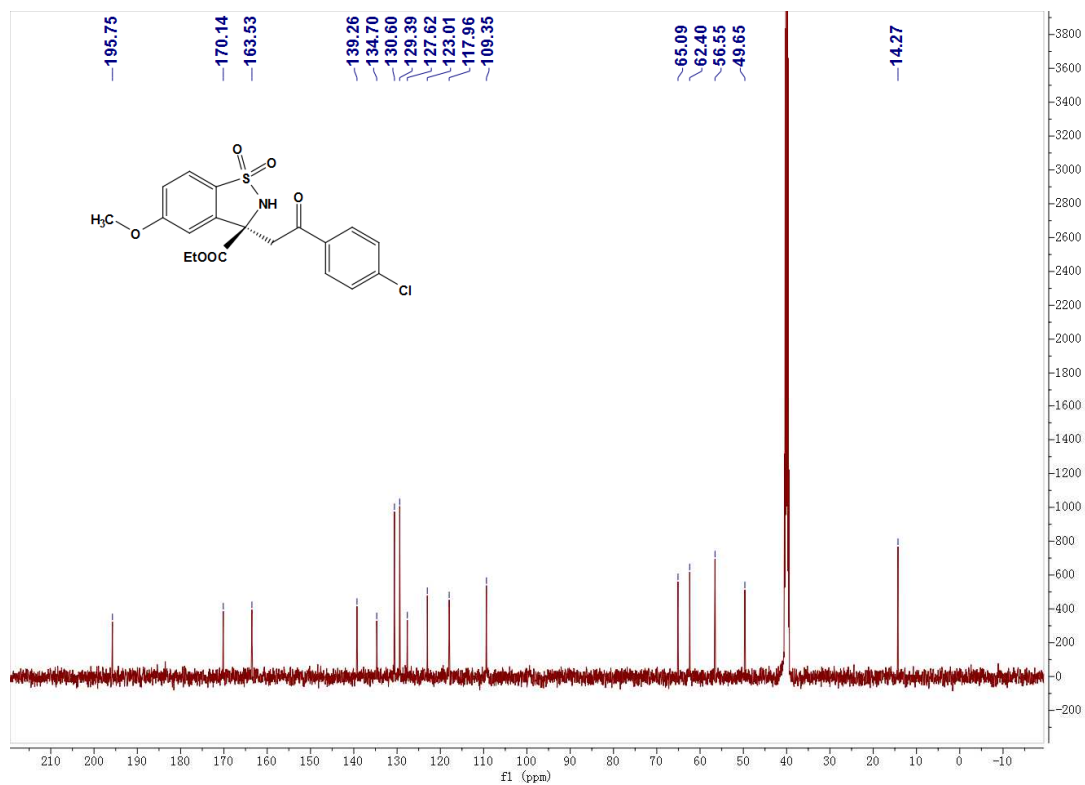

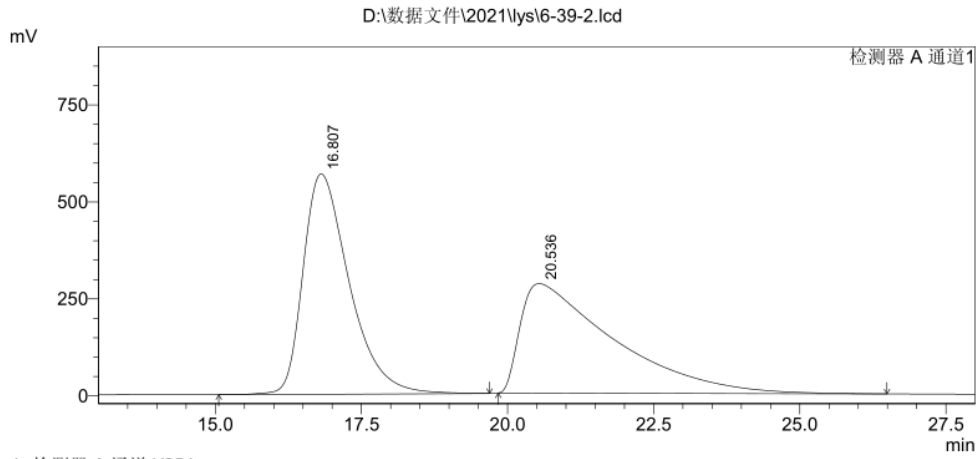

峰表

| 峰# | 保留时间   | 面积       | 高度     | 面积 %    | 高度 %    |
|----|--------|----------|--------|---------|---------|
| 1  | 16.807 | 31194504 | 567990 | 49.925  | 66.815  |
| 2  | 20.536 | 31288125 | 282107 | 50.075  | 33.185  |
| 总计 |        | 62482629 | 850097 | 100.000 | 100.000 |

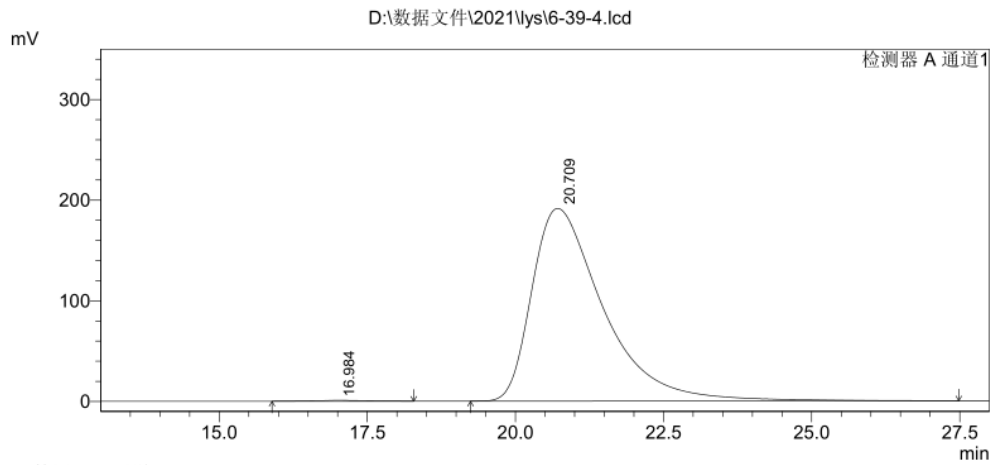

峰表

| 峰# | 保留时间   | 面积       | 高度     | 面积 %    | 高度 %    |
|----|--------|----------|--------|---------|---------|
| 1  | 16.984 | 48401    | 785    | 0.300   | 0.408   |
| 2  | 20.709 | 16092418 | 191535 | 99.700  | 99.592  |
| 总计 |        | 16140819 | 192320 | 100.000 | 100.000 |

**Ethyl 4-(2-oxo-2-phenylethyl)-3,4-dihydrobenzo[e][1,2,3]oxathiazine-4-carboxylate 2,2-dioxide (1ga)**

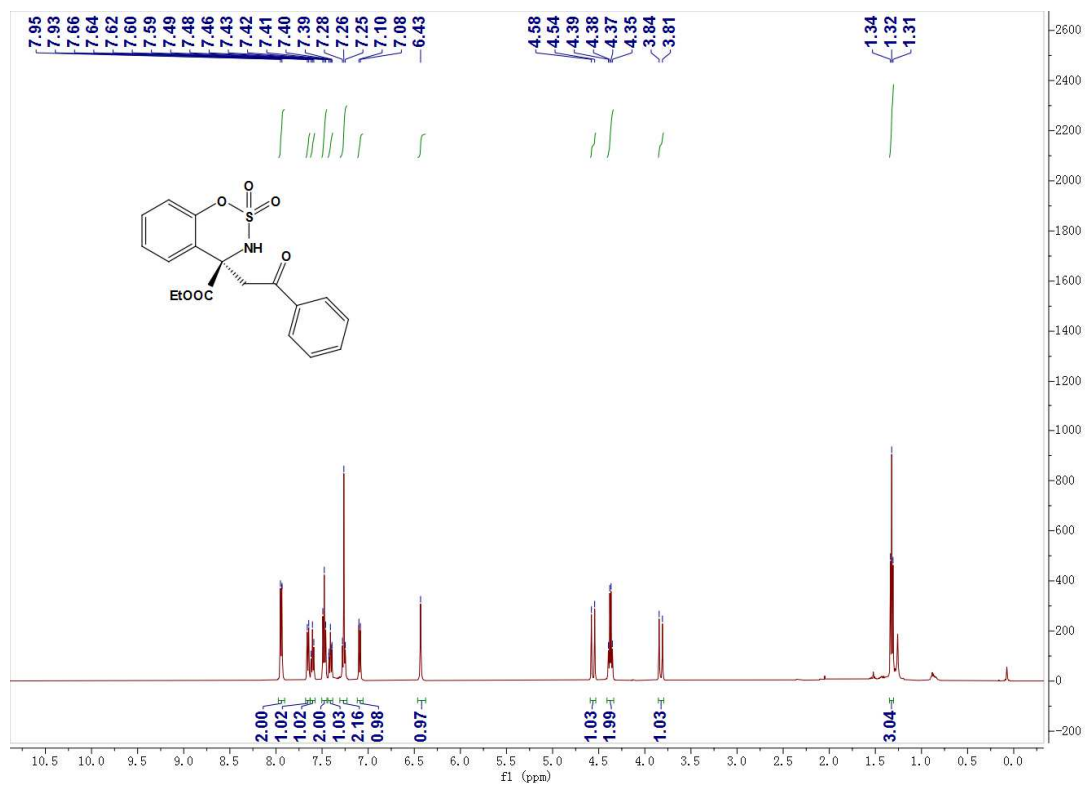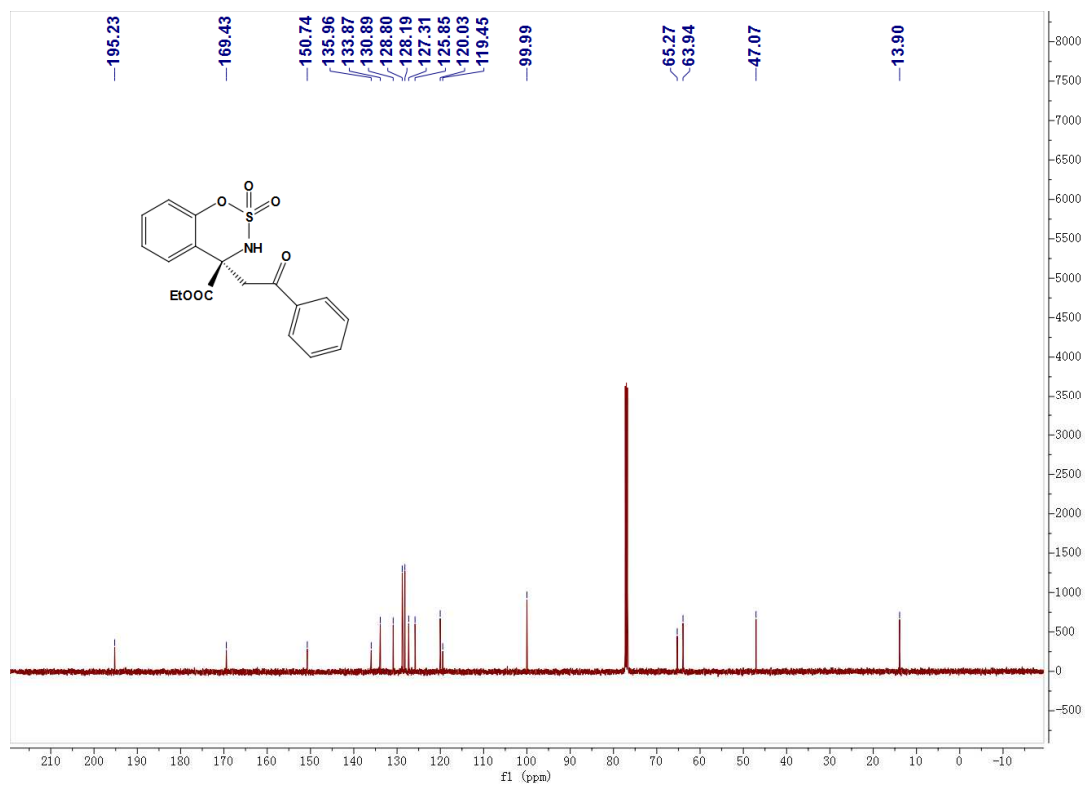

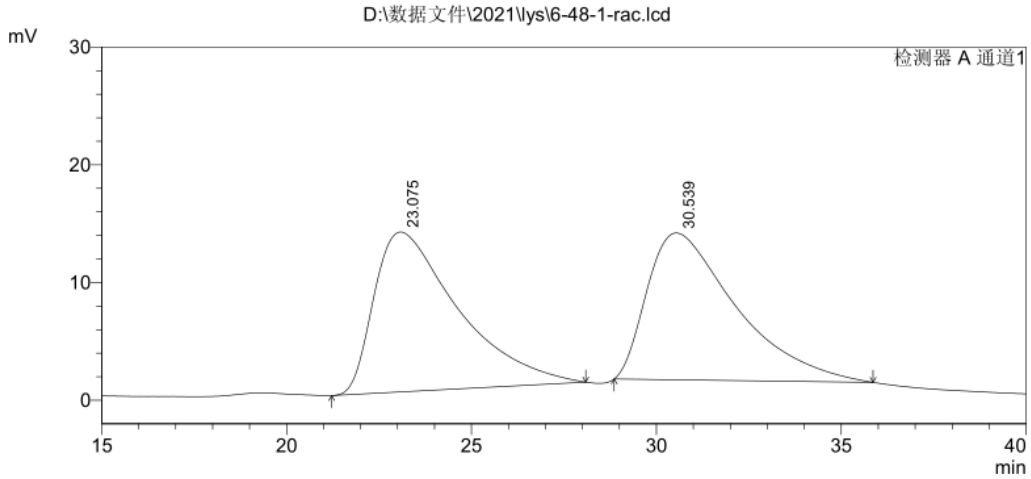

峰表

| 峰# | 保留时间   | 面积      | 高度    | 面积 %    | 高度 %    |
|----|--------|---------|-------|---------|---------|
| 1  | 23.075 | 2147179 | 13586 | 50.728  | 52.146  |
| 2  | 30.539 | 2085587 | 12468 | 49.272  | 47.854  |
| 总计 |        | 4232766 | 26054 | 100.000 | 100.000 |

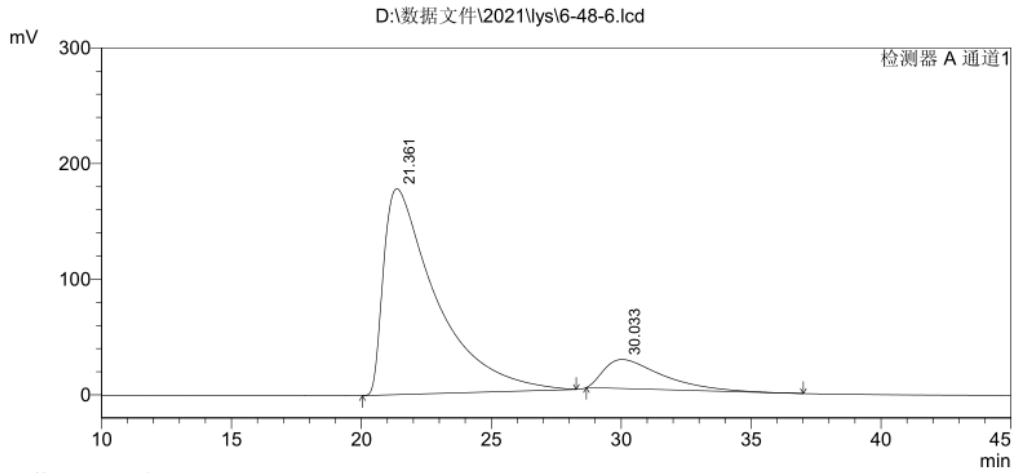

峰表

| 峰# | 保留时间   | 面积       | 高度     | 面积 %    | 高度 %    |
|----|--------|----------|--------|---------|---------|
| 1  | 21.361 | 25222970 | 178034 | 86.478  | 87.646  |
| 2  | 30.033 | 3943942  | 25094  | 13.522  | 12.354  |
| 总计 |        | 29166912 | 203129 | 100.000 | 100.000 |

# 2-(2,2-dioxido-3,4-dihydrobenzo[e][1,2,3]oxathiazin-4-yl)-1-phenylethanone

(1ha)

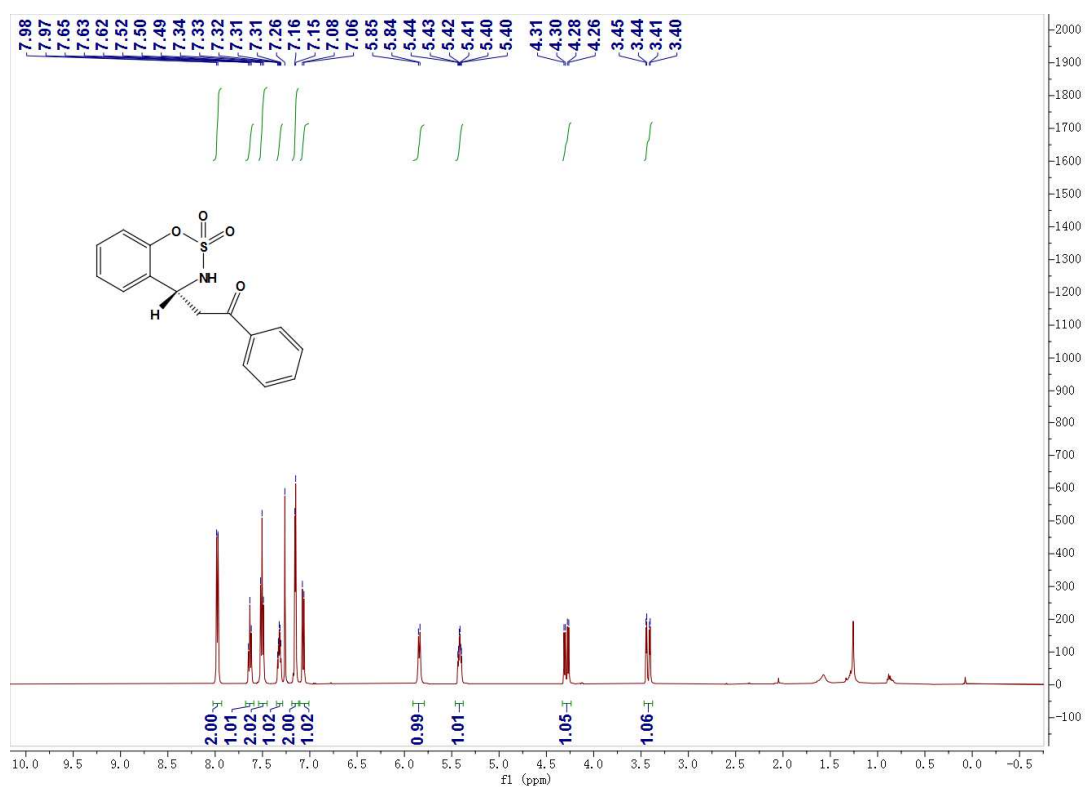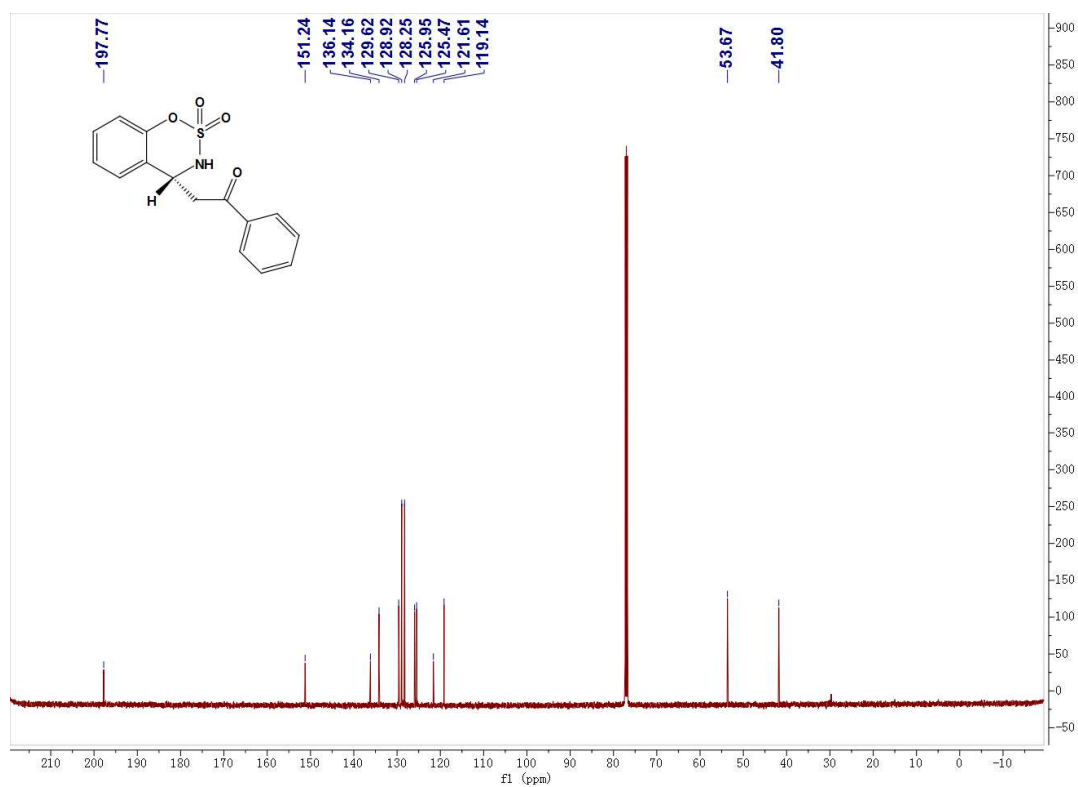



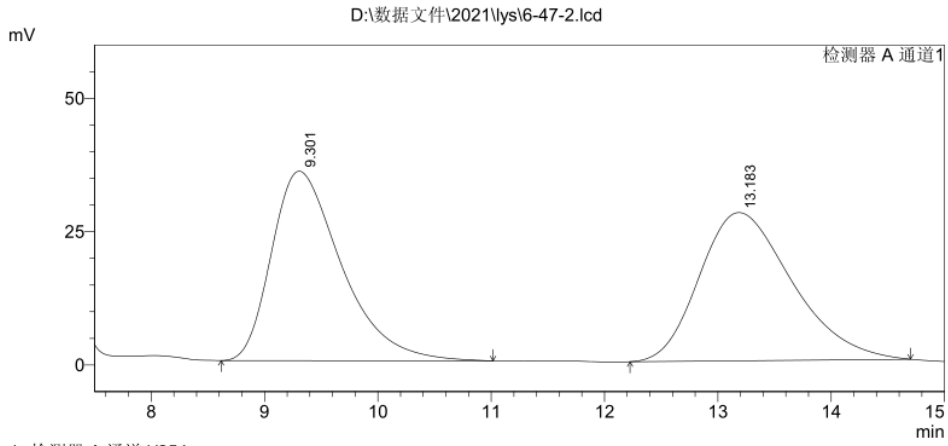

峰表

| 峰# | 保留时间   | 面积      | 高度    | 面积 %    | 高度 %    |
|----|--------|---------|-------|---------|---------|
| 1  | 9.301  | 1522530 | 35527 | 49.111  | 56.109  |
| 2  | 13.183 | 1577683 | 27791 | 50.889  | 43.891  |
| 总计 |        | 3100213 | 63318 | 100.000 | 100.000 |

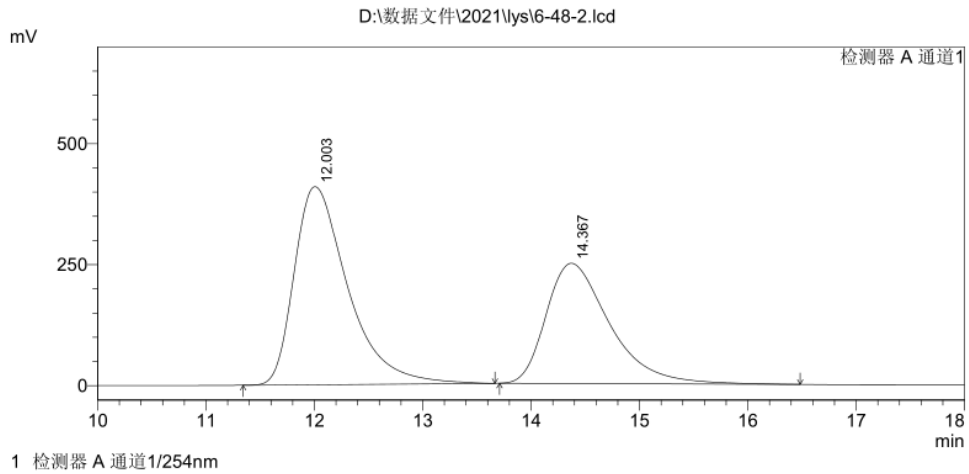

峰表

| 峰# | 保留时间   | 面积       | 高度     | 面积 %    | 高度 %    |
|----|--------|----------|--------|---------|---------|
| 1  | 12.003 | 14096828 | 409530 | 58.178  | 62.248  |
| 2  | 14.367 | 10133855 | 248368 | 41.822  | 37.752  |
| 总计 |        | 24230683 | 657898 | 100.000 | 100.000 |

**(R)-methyl 3-(2-oxo-2-phenylethyl)-2,3-dihydrobenzo[d]isothiazole-3-carboxylate**

**1,1-dioxide (1ia)**

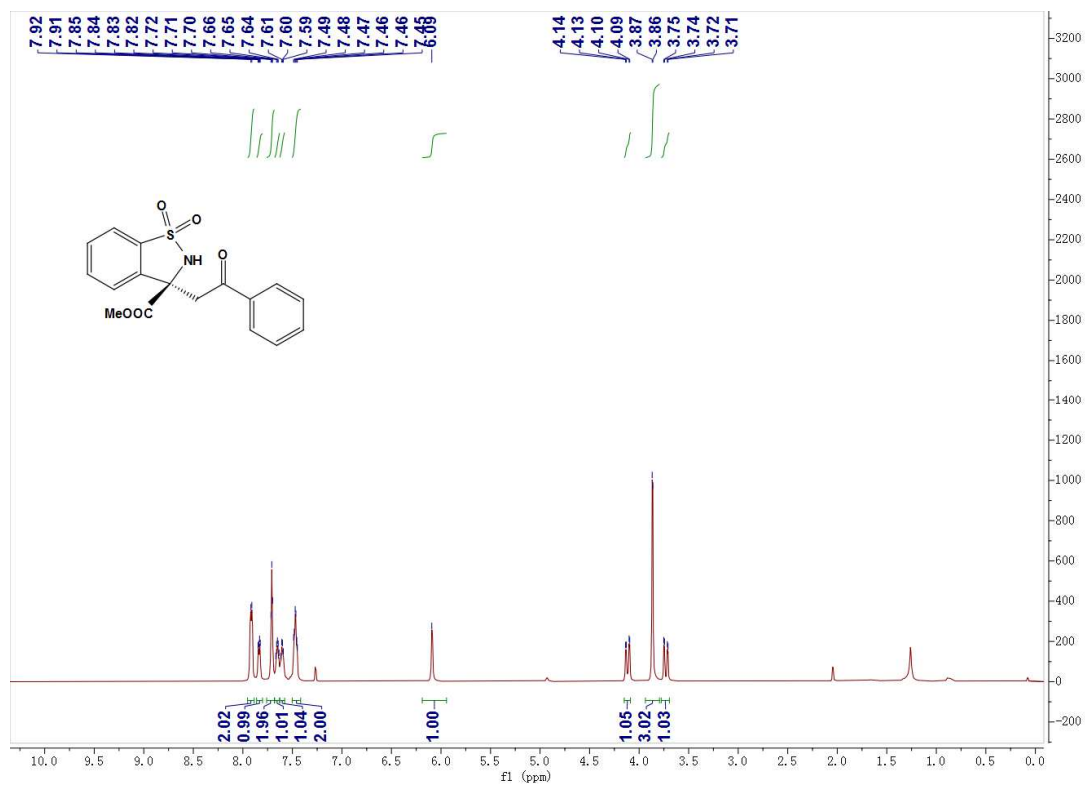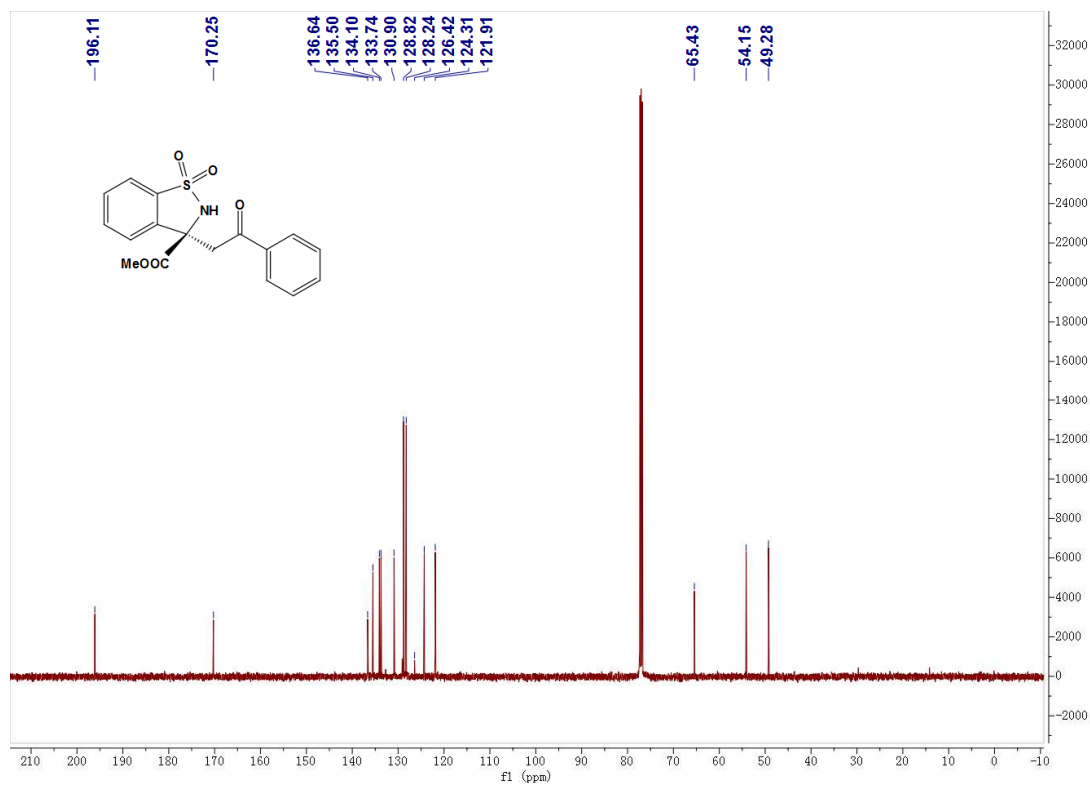

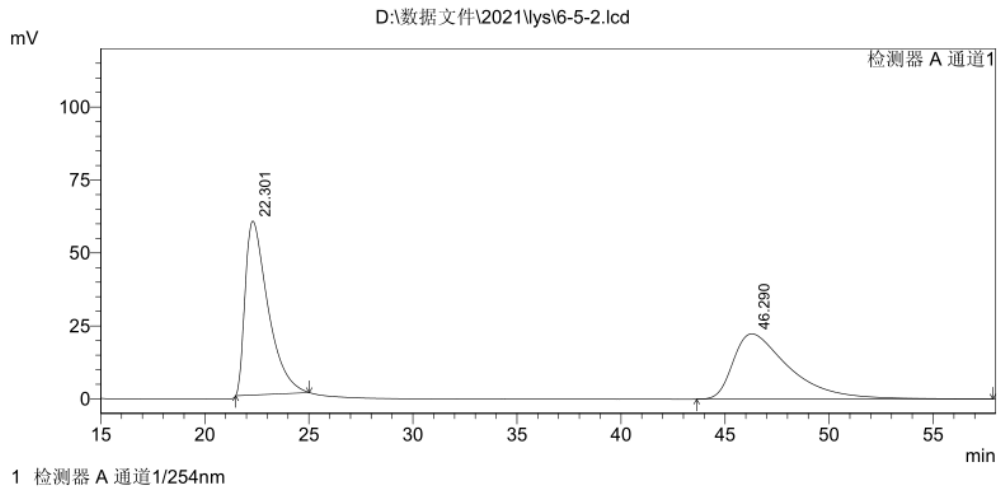

峰表

| 峰# | 保留时间   | 面积      | 高度    | 面积 %    | 高度 %    |
|----|--------|---------|-------|---------|---------|
| 1  | 22.301 | 4555618 | 59577 | 51.951  | 72.678  |
| 2  | 46.290 | 4213462 | 22397 | 48.049  | 27.322  |
| 总计 |        | 8769080 | 81974 | 100.000 | 100.000 |

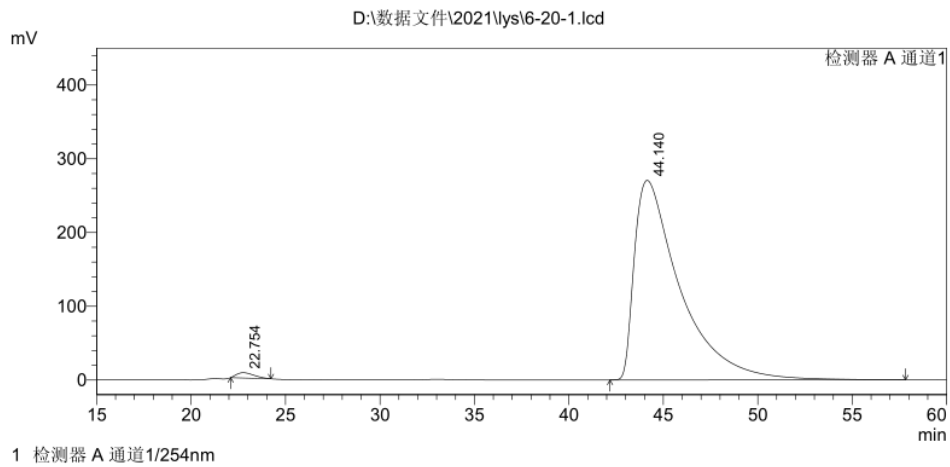

峰表

| 峰# | 保留时间   | 面积       | 高度     | 面积 %    | 高度 %    |
|----|--------|----------|--------|---------|---------|
| 1  | 22.754 | 460760   | 7140   | 0.998   | 2.568   |
| 2  | 44.140 | 45727487 | 270852 | 99.002  | 97.432  |
| 总计 |        | 46188246 | 277992 | 100.000 | 100.000 |

**(R)-2-(1,1-dioxido-2,3-dihydrobenzo[d]isothiazol-3-yl)-1-phenylethanone (1ja)**

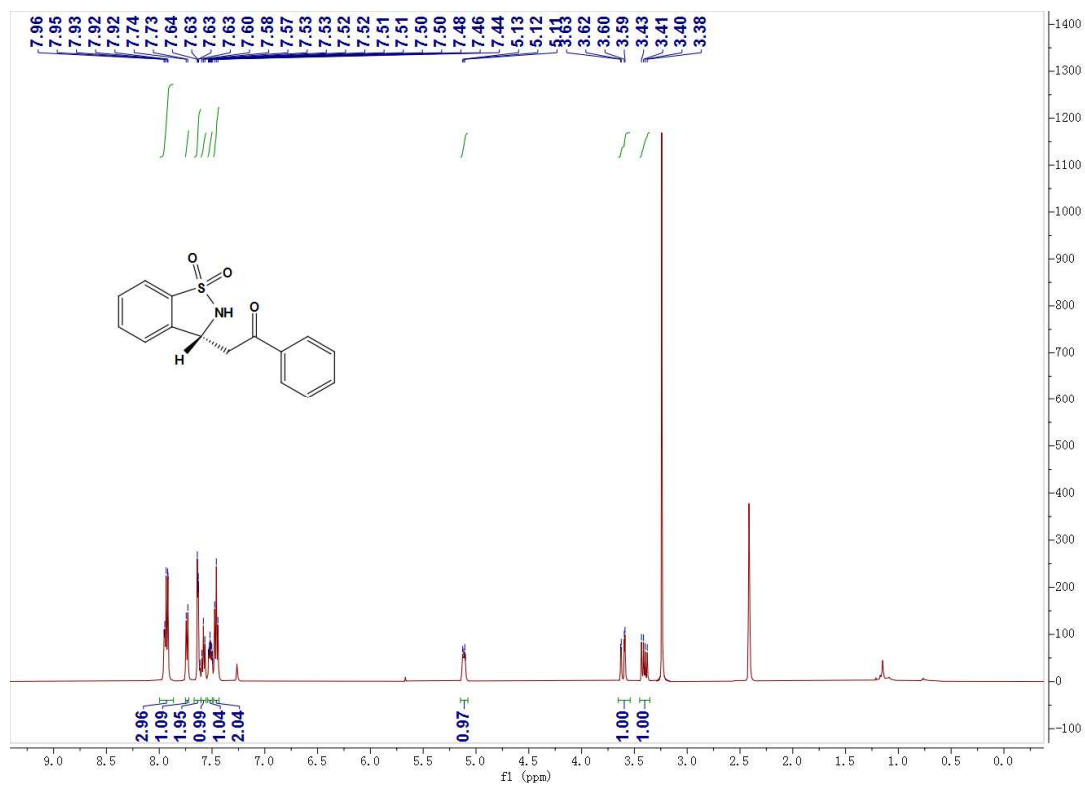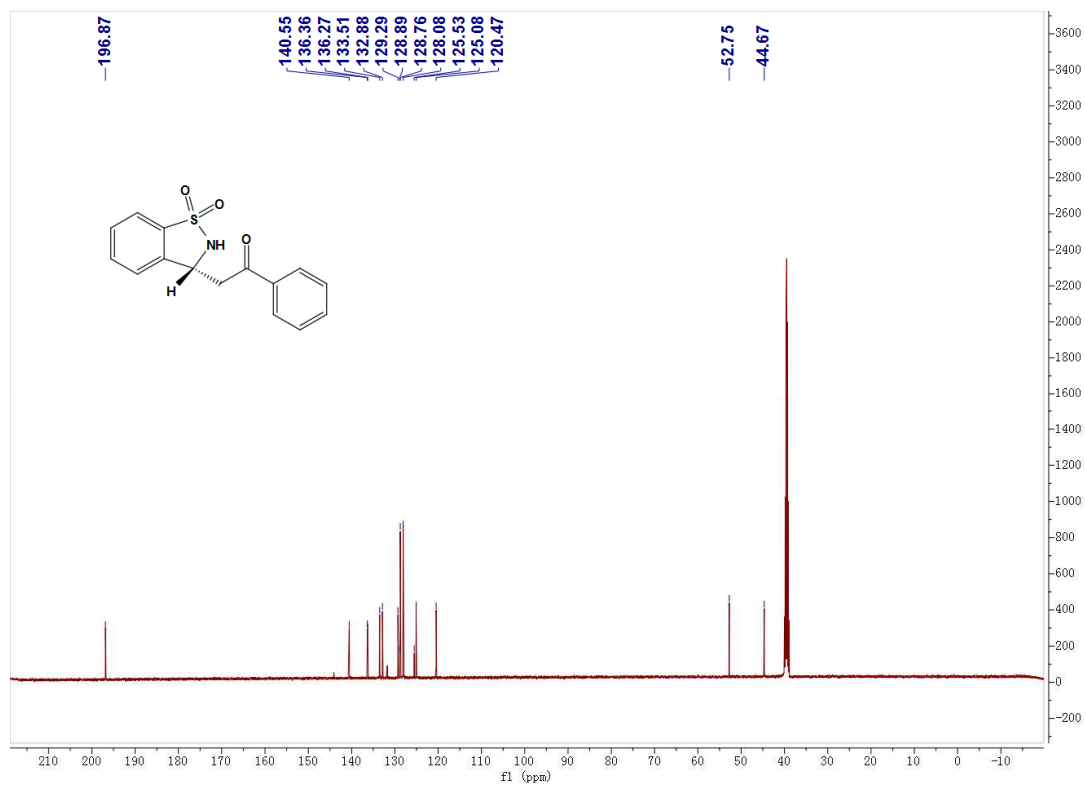

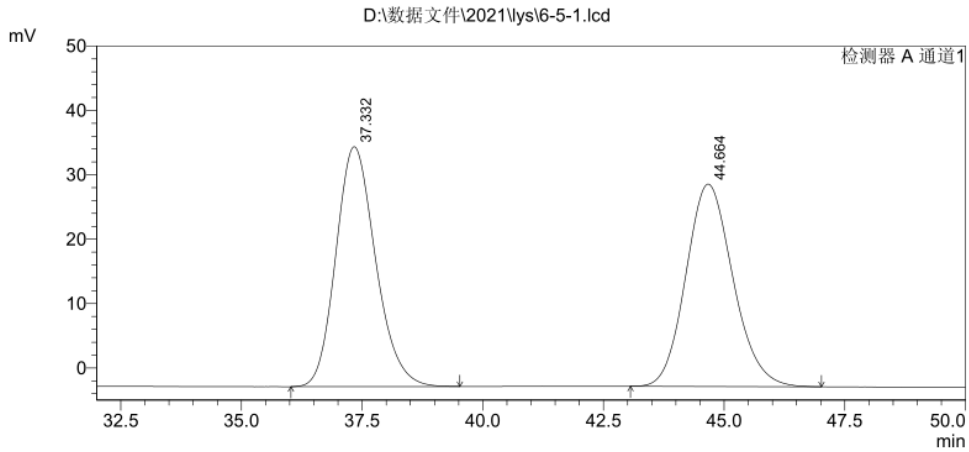

峰表

| 峰# | 保留时间   | 面积      | 高度    | 面积 %    | 高度 %    |
|----|--------|---------|-------|---------|---------|
| 1  | 37.332 | 2134060 | 37251 | 50.007  | 54.232  |
| 2  | 44.664 | 2133421 | 31437 | 49.993  | 45.768  |
| 总计 |        | 4267482 | 68688 | 100.000 | 100.000 |

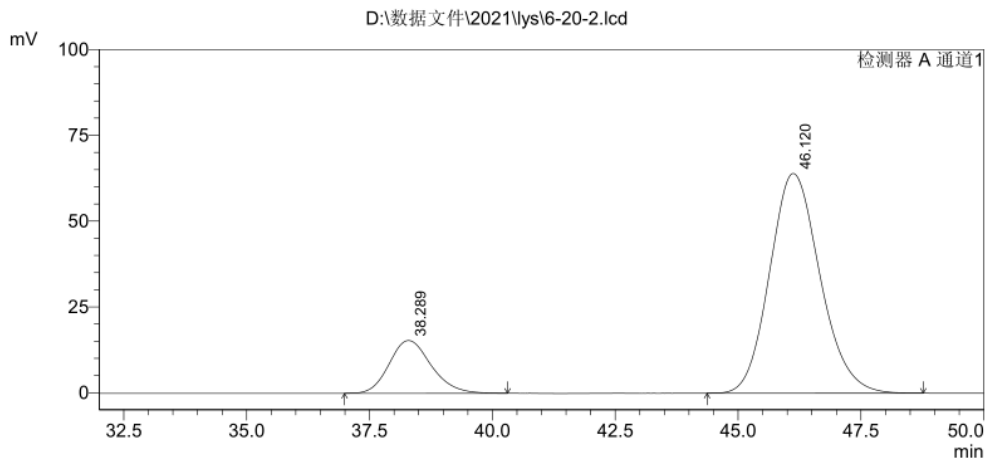

峰表

| 峰# | 保留时间   | 面积      | 高度    | 面积 %    | 高度 %    |
|----|--------|---------|-------|---------|---------|
| 1  | 38.289 | 919771  | 15445 | 16.741  | 19.417  |
| 2  | 46.120 | 4574356 | 64100 | 83.259  | 80.583  |
| 总计 |        | 5494127 | 79545 | 100.000 | 100.000 |

**(R)-ethyl 3-((S)-1-oxo-1-phenylpropan-2-yl)-2,3-dihydrobenzo[d]isothiazole**

**-3-carboxylate 1,1-dioxide (1ap)**

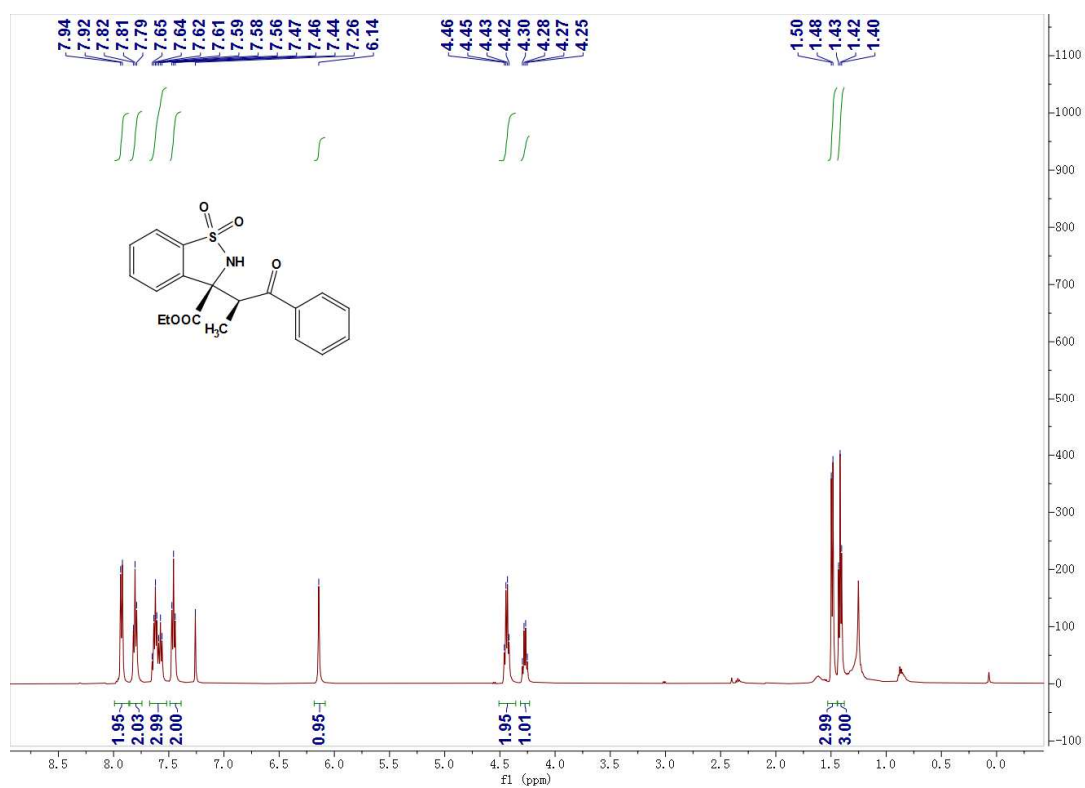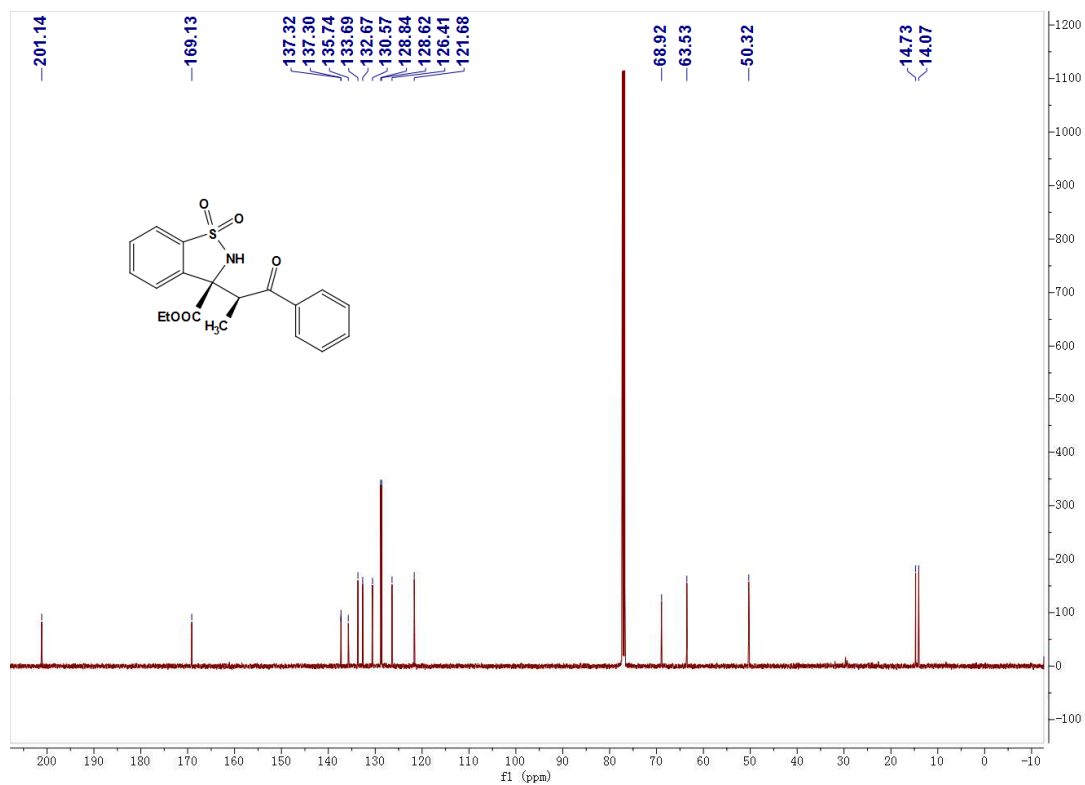

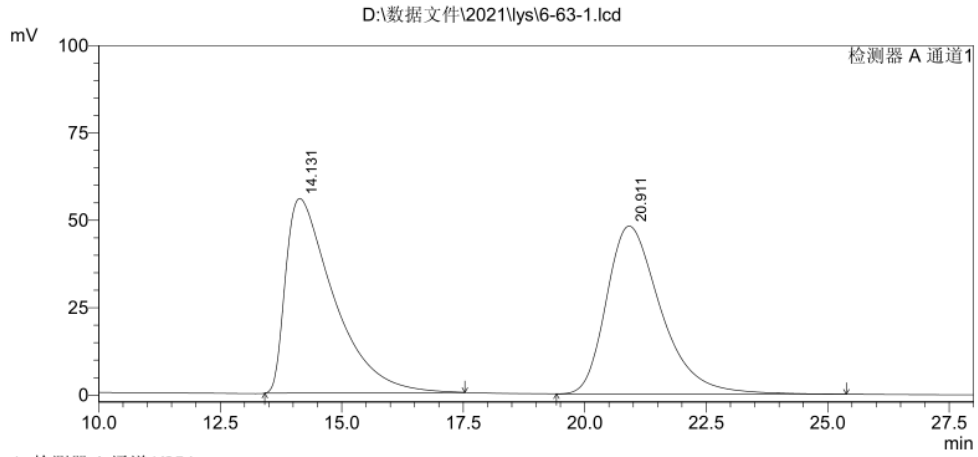

峰表

| 峰# | 保留时间   | 面积      | 高度     | 面积 %    | 高度 %    |
|----|--------|---------|--------|---------|---------|
| 1  | 14.131 | 3847105 | 55686  | 50.626  | 53.678  |
| 2  | 20.911 | 3752004 | 48055  | 49.374  | 46.322  |
| 总计 |        | 7599110 | 103741 | 100.000 | 100.000 |

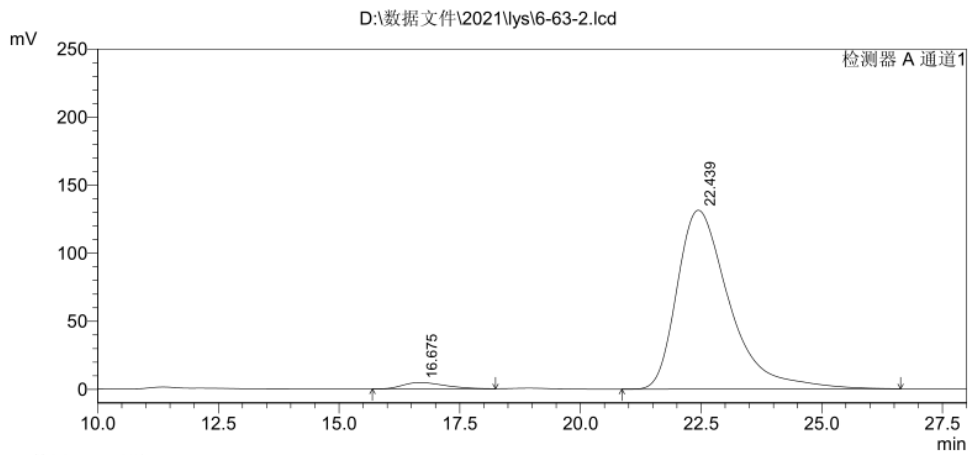

峰表

| 峰# | 保留时间   | 面积       | 高度     | 面积 %    | 高度 %    |
|----|--------|----------|--------|---------|---------|
| 1  | 16.675 | 284806   | 4696   | 2.785   | 3.448   |
| 2  | 22.439 | 9943051  | 131483 | 97.215  | 96.552  |
| 总计 |        | 10227857 | 136179 | 100.000 | 100.000 |

**(R)-ethyl 3-(1,1-difluoro-2-oxo-2-phenylethyl)-2,3-dihydrobenzo[d]isothiazole**

**-3-carboxylate 1,1-dioxide (1aq)**

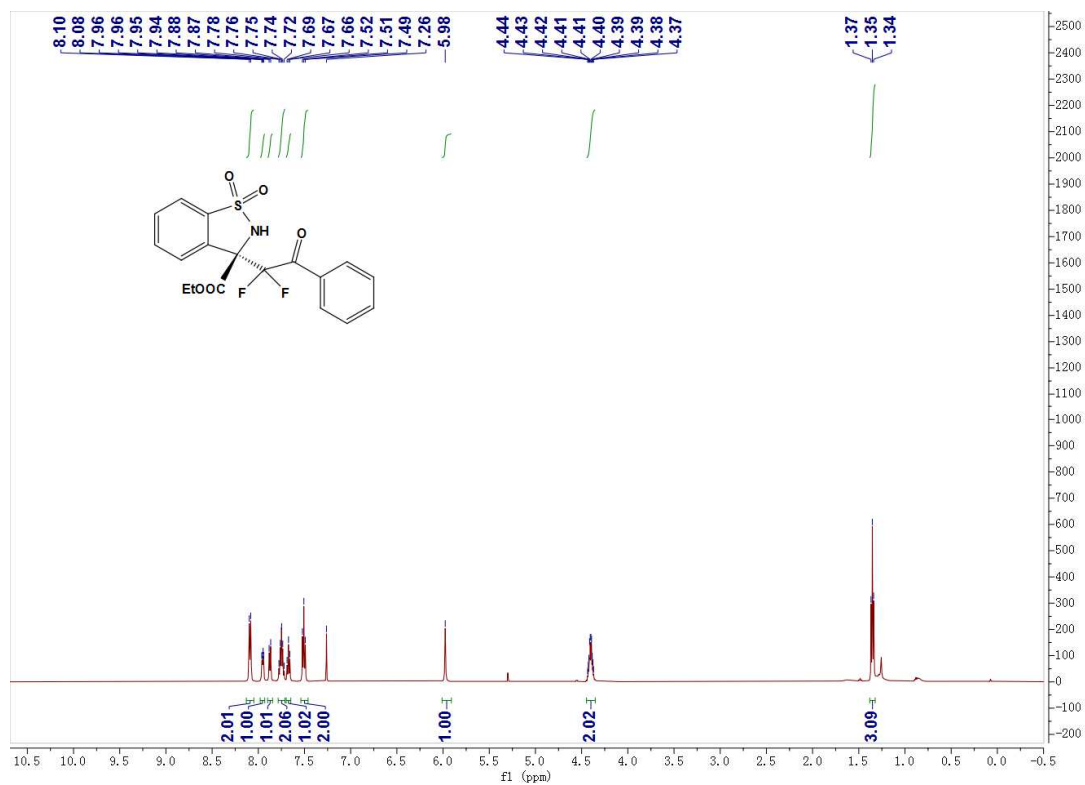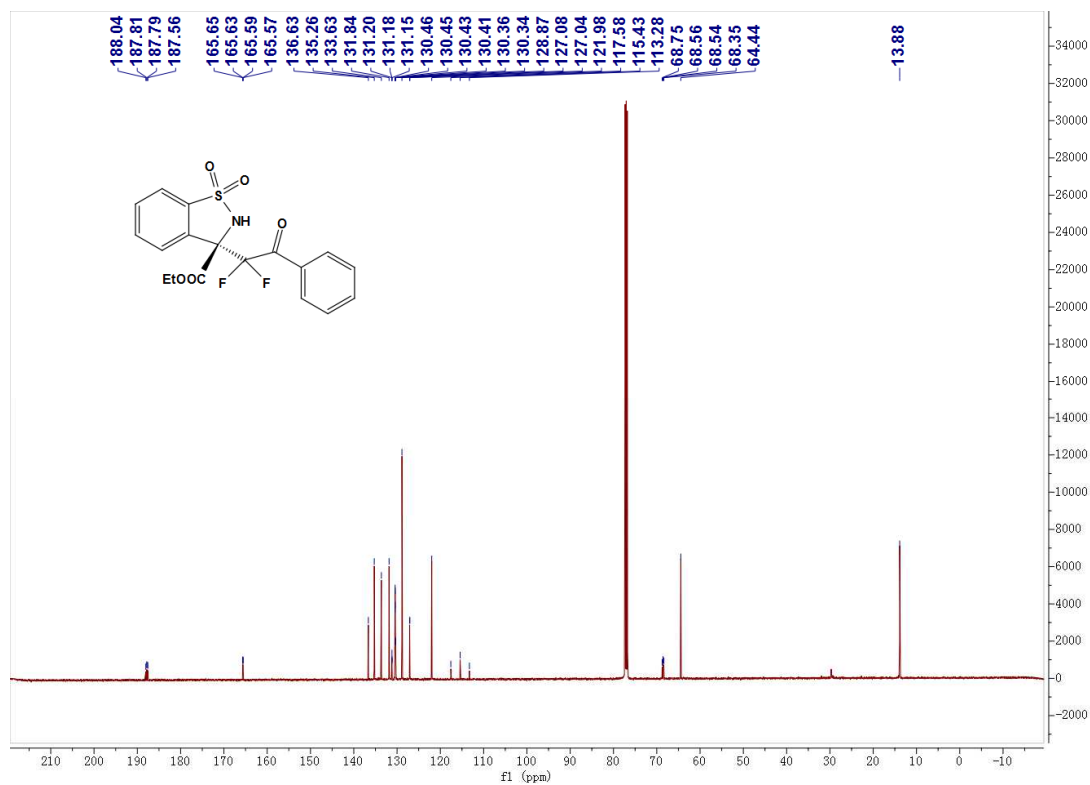



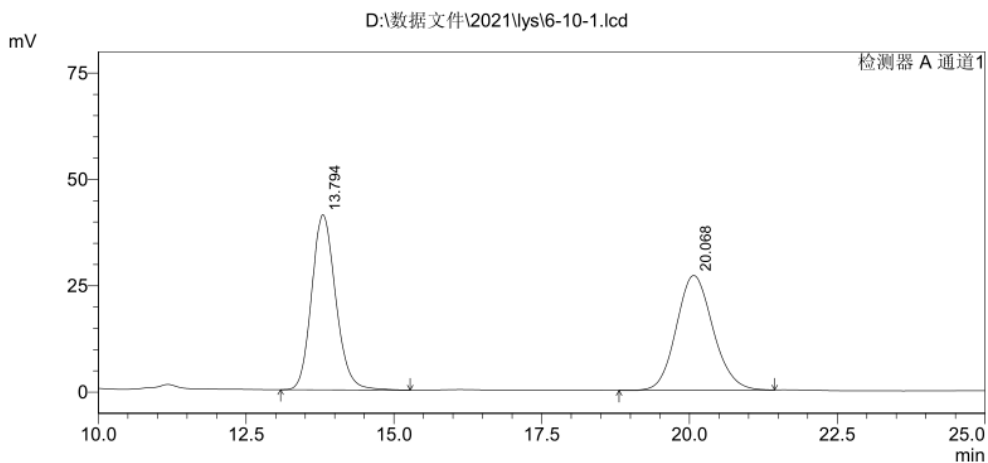

1 检测器 A 通道1/254nm

峰表

| 检测器 A Ch1 254nm |        |         |       |         |         |
|-----------------|--------|---------|-------|---------|---------|
| 峰#              | 保留时间   | 面积      | 高度    | 面积 %    | 高度 %    |
| 1               | 13.794 | 1168037 | 41162 | 50.033  | 60.387  |
| 2               | 20.068 | 1166512 | 27002 | 49.967  | 39.613  |
| 总计              |        | 2334549 | 68164 | 100.000 | 100.000 |

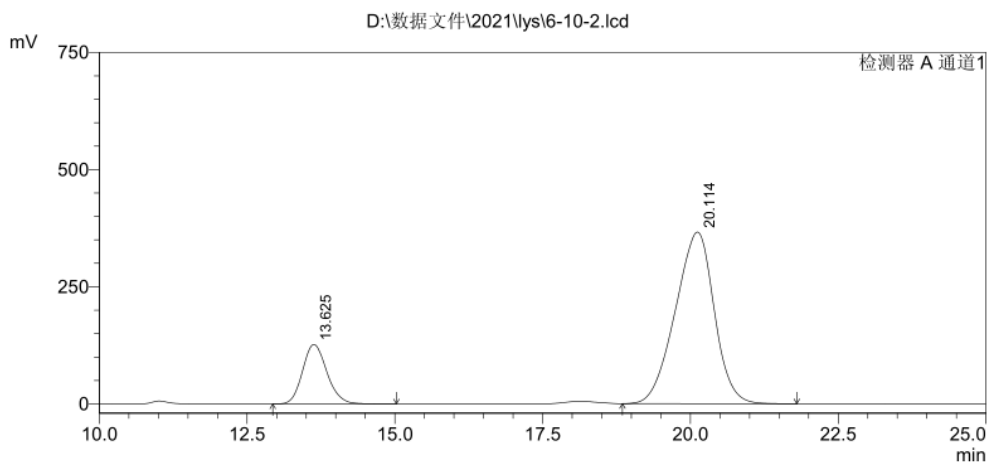

1 检测器 A 通道1/254nm

峰表

| 检测器 A Ch1 254nm |        |          |        |         |         |
|-----------------|--------|----------|--------|---------|---------|
| 峰#              | 保留时间   | 面积       | 高度     | 面积 %    | 高度 %    |
| 1               | 13.625 | 3641993  | 126843 | 17.869  | 25.734  |
| 2               | 20.114 | 16739240 | 366066 | 82.131  | 74.266  |
| 总计              |        | 20381233 | 492909 | 100.000 | 100.000 |

**(R)-ethyl 3-phenethyl-2,3-dihydrobenzo[d]isothiazole-3-carboxylate 1,1-dioxide**

**(4)**

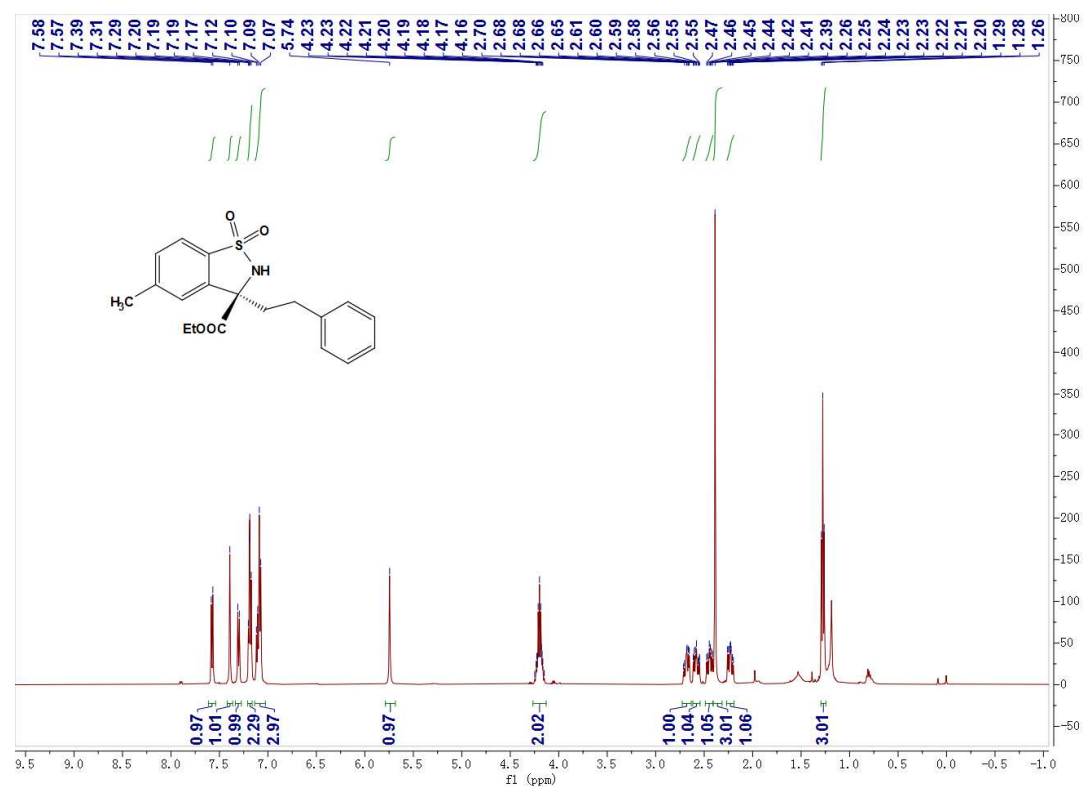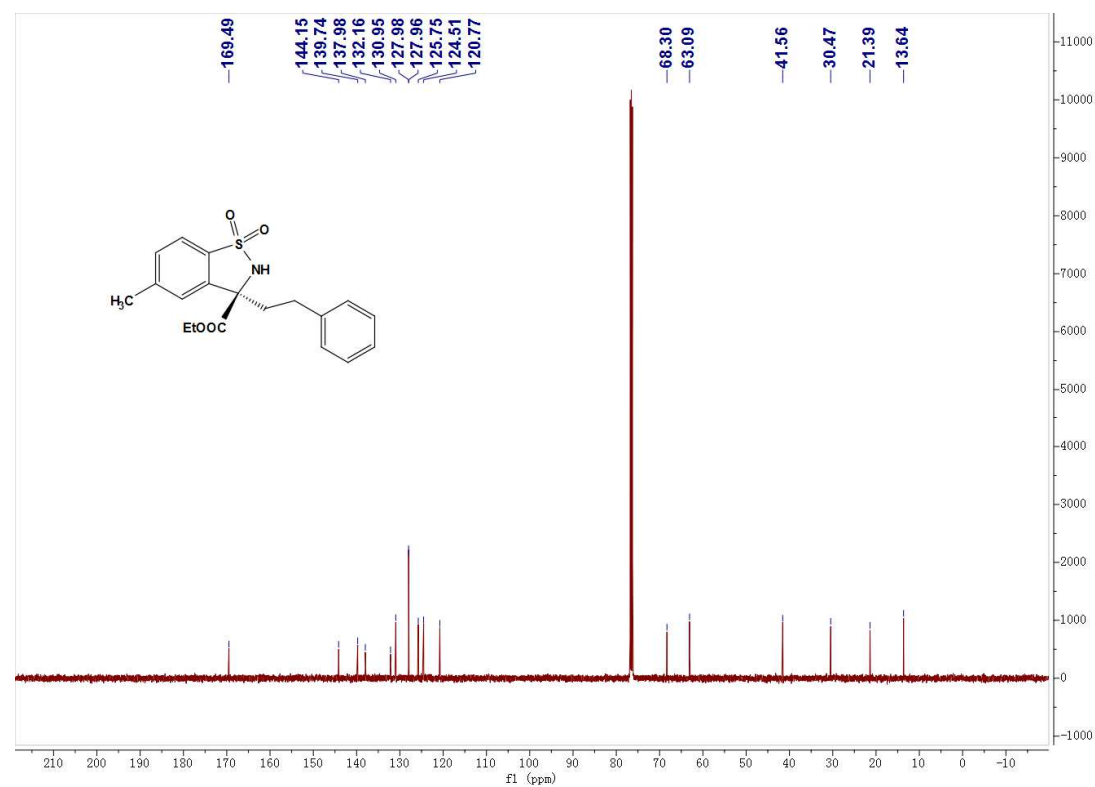

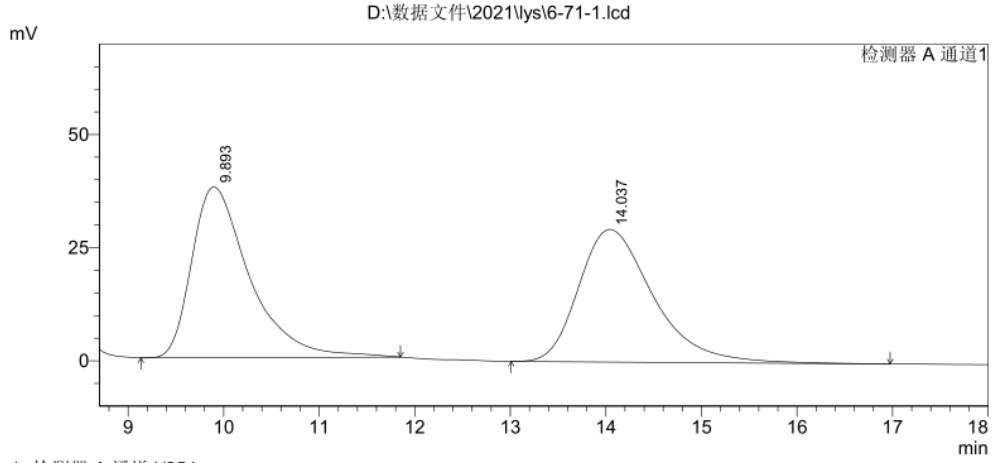

峰表

| 峰# | 保留时间   | 面积      | 高度    | 面积 %    | 高度 %    |
|----|--------|---------|-------|---------|---------|
| 1  | 9.893  | 1585621 | 37703 | 49.958  | 56.274  |
| 2  | 14.037 | 1588287 | 29296 | 50.042  | 43.726  |
| 总计 |        | 3173908 | 67000 | 100.000 | 100.000 |

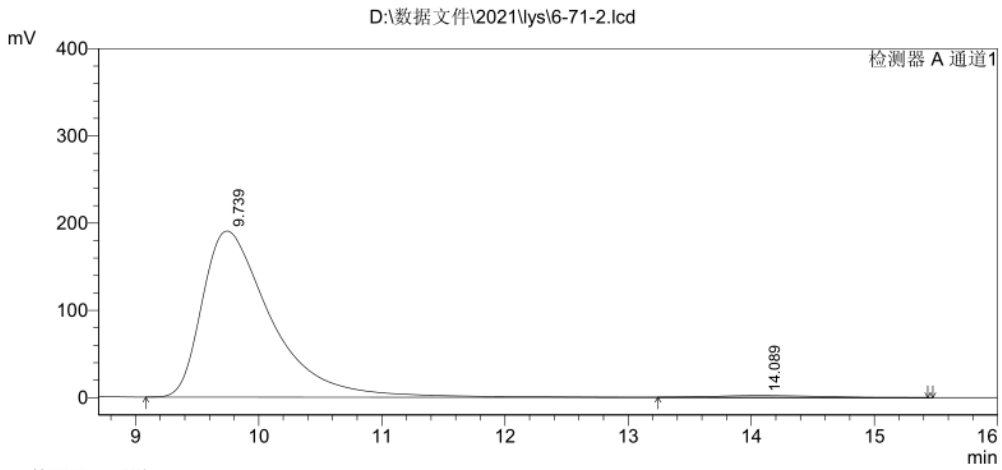

峰表

| 峰# | 保留时间   | 面积      | 高度     | 面积 %    | 高度 %    |
|----|--------|---------|--------|---------|---------|
| 1  | 9.739  | 7470785 | 190500 | 98.566  | 98.902  |
| 2  | 14.089 | 108690  | 2115   | 1.434   | 1.098   |
| 总计 |        | 7579476 | 192614 | 100.000 | 100.000 |

## 5. References

- [1] D. Connors, N. Goroff, *Org. Lett.* **2016**, 18, 4262.
- [2] Q. H. Shao, L. Wu, J. Z. Chen, I. D. Gridnev, G. Q. Yang, F. Xie, W. B. Zhang, *Adv. Synth. Catal.* **2018**, 360, 4625.
- [3] R. Warmuth, T. E. Munsch, R. A. Stalker, B. Li, A. Beatty, *Tetrahedron* **2001**, 57, 6383.
- [4] (a) Y. F. Gao, Z. X. Qiu, R. Sun, N. X. Gao, G. R. Cao, D. W. Teng, *Tetrahedron Lett.* **2018**, 59, 3938.
- (b) N. X. Gao, Y. S. Li, G. R. Cao, D. W. Teng, *New J. Chem.* **2021**, 45, 16477.
